# Supplementary material for: Rice Chalky Grain 5 regulates natural variation for grain quality under heat stress
Source: Front Plant Sci. 2022 Oct 11;13:1026472. doi: 10.3389/fpls.2022.1026472 (PMC9593041; doi:10.3389/fpls.2022.1026472)
Supplement: Supplementary Table S1 — Details of rice diversity panel 1 accessions used in the study. [file Table_1.xlsx]

## Sheet: Sheet1
Table S1. Rice diversity panel 1 accessions selected for the genome-wide association study.
GSOR_Id	NSFTV_Id	Sub-species
301079	NSFTV_87	admixed-japonica
301296	NSFTV_306	temperate-japonica
301038	NSFTV_40	admixed-japonica
301160	NSFTV_169	temperate-japonica
301329	NSFTV_339	indica
301058	NSFTV_65	tropical-japonica
301068	NSFTV_75	tropical-japonica
301138	NSFTV_147	tropical-japonica
301337	NSFTV_347	tropical-japonica
301232	NSFTV_242	tropical-japonica
301144	NSFTV_153	aus
301261	NSFTV_271	temperate-japonica
301093	NSFTV_101	tropical-japonica
301155	NSFTV_164	tropical-japonica
301162	NSFTV_171	indica
301174	NSFTV_183	tropical-japonica
301263	NSFTV_273	tropical-japonica
301325	NSFTV_335	admixed-japonica
301170	NSFTV_179	temperate-japonica
301062	NSFTV_69	tropical-japonica
301362	NSFTV_377	tropical-japonica
301024	NSFTV_26	tropical-japonica
301344	NSFTV_356	indica
301076	NSFTV_84	tropical-japonica
301031	NSFTV_33	aus
301156	NSFTV_165	tropical-japonica
301171	NSFTV_180	temperate-japonica
301226	NSFTV_236	admixed-japonica
301192	NSFTV_201	tropical-japonica
301019	NSFTV_21	indica
301084	NSFTV_92	tropical-japonica
301145	NSFTV_154	temperate-japonica
301043	NSFTV_46	tropical-japonica
301042	NSFTV_45	aromatic
301184	NSFTV_193	tropical-japonica
301235	NSFTV_245	temperate-japonica
301182	NSFTV_191	aromatic
301231	NSFTV_241	indica
301338	NSFTV_348	indica
301233	NSFTV_243	temperate-japonica
301224	NSFTV_234	indica
301151	NSFTV_160	aromatic
301374	NSFTV_391	tropical-japonica
301158	NSFTV_167	tropical-japonica
301209	NSFTV_218	admixed-japonica
301378	NSFTV_395	tropical-japonica
301238	NSFTV_248	temperate-japonica
301369	NSFTV_386	tropical-japonica
301112	NSFTV_120	tropical-japonica
301063	NSFTV_70	tropical-japonica
301130	NSFTV_139	tropical-japonica
301061	NSFTV_68	NA
301025	NSFTV_27	tropical-japonica
301040	NSFTV_43	indica
301051	NSFTV_55	admixed-japonica
301005	NSFTV_5	aromatic
301213	NSFTV_222	indica
301143	NSFTV_152	aus
301075	NSFTV_83	temperate-japonica
301110	NSFTV_118	temperate-japonica
301089	NSFTV_97	NA
301098	NSFTV_106	indica
301214	NSFTV_223	tropical-japonica
301081	NSFTV_89	tropical-japonica
301122	NSFTV_131	aus
301316	NSFTV_326	aus
301190	NSFTV_199	tropical-japonica
301255	NSFTV_265	admixed-japonica
301223	NSFTV_233	temperate-japonica
301020	NSFTV_22	tropical-japonica
301106	NSFTV_114	admixed-japonica
301405	NSFTV_619	tropical-japonica
301210	NSFTV_219	temperate-japonica
301311	NSFTV_321	aus
301090	NSFTV_98	tropical-japonica
301066	NSFTV_73	tropical-japonica
301358	NSFTV_371	aus
301168	NSFTV_177	temperate-japonica
301312	NSFTV_322	aus
301126	NSFTV_135	NA
301003	NSFTV_3	indica
301023	NSFTV_25	tropical-japonica
301254	NSFTV_264	admixed-japonica
301001	NSFTV_1	temperate-japonica
301052	NSFTV_56	temperate-japonica
301177	NSFTV_186	temperate-japonica
301197	NSFTV_206	admixed-indica
301407	NSFTV_623	NA
301163	NSFTV_172	indica
301113	NSFTV_121	admixed-japonica
301217	NSFTV_226	tropical-japonica
301069	NSFTV_76	indica
301006	NSFTV_6	aus
301256	NSFTV_266	admixed-japonica
301189	NSFTV_198	tropical-japonica
301364	NSFTV_379	tropical-japonica
301301	NSFTV_311	temperate-japonica
301148	NSFTV_157	temperate-japonica
301208	NSFTV_217	admixed-japonica
301380	NSFTV_397	tropical-japonica
301067	NSFTV_74	indica
301222	NSFTV_232	temperate-japonica
301027	NSFTV_29	indica
301105	NSFTV_113	temperate-japonica
301055	NSFTV_59	tropical-japonica
301230	NSFTV_240	tropical-japonica
301253	NSFTV_263	temperate-japonica
301195	NSFTV_204	temperate-japonica
301216	NSFTV_225	temperate-japonica
301004	NSFTV_4	aus
301303	NSFTV_313	indica
301012	NSFTV_13	aus
301274	NSFTV_284	indica
301096	NSFTV_104	temperate-japonica
301085	NSFTV_93	aromatic
301247	NSFTV_257	temperate-japonica
301221	NSFTV_231	indica
301109	NSFTV_117	indica
301237	NSFTV_247	temperate-japonica
301271	NSFTV_281	admixed-japonica
301285	NSFTV_295	temperate-japonica
301282	NSFTV_292	temperate-japonica
301141	NSFTV_150	tropical-japonica
301227	NSFTV_237	admixed-japonica
301010	NSFTV_10	temperate-japonica
301157	NSFTV_166	admixed-indica
301343	NSFTV_355	temperate-japonica
301279	NSFTV_289	temperate-japonica
301306	NSFTV_316	aus
301327	NSFTV_337	indica
301094	NSFTV_102	indica
301291	NSFTV_301	temperate-japonica
301146	NSFTV_155	temperate-japonica
301225	NSFTV_235	indica
301406	NSFTV_620	indica
301351	NSFTV_364	admixed-japonica
301125	NSFTV_134	temperate-japonica
301220	NSFTV_229	NA
301092	NSFTV_100	admixed-japonica
301367	NSFTV_384	tropical-japonica
301009	NSFTV_9	temperate-japonica
301053	NSFTV_57	indica
301095	NSFTV_103	temperate-japonica
301244	NSFTV_254	NA
301269	NSFTV_279	admixed
301014	NSFTV_16	aromatic
301200	NSFTV_209	indica
301183	NSFTV_192	temperate-japonica
301202	NSFTV_211	admixed-japonica
301015	NSFTV_17	indica
301287	NSFTV_297	temperate-japonica
301295	NSFTV_305	admixed-japonica
301147	NSFTV_156	indica
301278	NSFTV_288	temperate-japonica
301196	NSFTV_205	temperate-japonica
301072	NSFTV_79	temperate-japonica
301273	NSFTV_283	temperate-japonica
301339	NSFTV_349	indica
301265	NSFTV_275	temperate-japonica
301323	NSFTV_333	temperate-japonica
301082	NSFTV_90	indica
301054	NSFTV_58	aus
301205	NSFTV_214	tropical-japonica
301324	NSFTV_334	temperate-japonica
301057	NSFTV_61	NA
301240	NSFTV_250	temperate-japonica
301357	NSFTV_370	aus
301292	NSFTV_302	temperate-japonica
301115	NSFTV_123	indica
301366	NSFTV_381	tropical-japonica
301071	NSFTV_78	aus
301121	NSFTV_130	indica
301116	NSFTV_125	indica
301229	NSFTV_239	tropical-japonica
301280	NSFTV_290	temperate-japonica
301120	NSFTV_129	indica
301251	NSFTV_261	aus
301074	NSFTV_81	aus
301152	NSFTV_161	indica
301336	NSFTV_346	aus
301331	NSFTV_341	aus
301041	NSFTV_44	aus
301252	NSFTV_262	aus
301356	NSFTV_369	aus
301048	NSFTV_52	temperate-japonica
301219	NSFTV_228	aus
301204	NSFTV_213	tropical-japonica
301363	NSFTV_378	aus
301037	NSFTV_39	aus
301046	NSFTV_50	NA
301017	NSFTV_19	aus
301249	NSFTV_259	admixed-indica
301245	NSFTV_255	indica
301305	NSFTV_315	indica
301326	NSFTV_336	aus
301321	NSFTV_331	aus
301264	NSFTV_274	tropical-japonica
301307	NSFTV_317	aus
301308	NSFTV_318	aus
301322	NSFTV_332	admixed-indica
301335	NSFTV_345	aus
301341	NSFTV_353	aus
301302	NSFTV_312	NA
301317	NSFTV_327	aus
301320	NSFTV_330	aus
301348	NSFTV_360	aus
301288	NSFTV_298	NA
301215	NSFTV_224	temperate-japonica
301310	NSFTV_320	aus
301294	NSFTV_304	indica
301045	NSFTV_49	aus
301159	NSFTV_168	NA
301410	NSFTV_629	admixed-japonica
301236	NSFTV_246	aus
301049	NSFTV_53	aromatic
301080	NSFTV_88	NA
301119	NSFTV_128	admixed-japonica
301416	NSFTV_616	indica
301091	NSFTV_99	tropical-japonica
301099	NSFTV_107	tropical-japonica
301153	NSFTV_162	indica
301035	NSFTV_37	tropical-japonica
301297	NSFTV_307	temperate-japonica
301368	NSFTV_385	indica
301352	NSFTV_365	temperate-japonica
301175	NSFTV_184	temperate-japonica
301127	NSFTV_136	indica
301347	NSFTV_359	aus
301207	NSFTV_216	temperate-japonica
