# Supplementary material for: Rice Chalky Grain 5 regulates natural variation for grain quality under heat stress
Source: Front Plant Sci. 2022 Oct 11;13:1026472. doi: 10.3389/fpls.2022.1026472 (PMC9593041; doi:10.3389/fpls.2022.1026472)
Supplement: Supplementary Table S2 — List of all primers used in the study. [file Table_2.xlsx]

## Sheet: Sheet1
Table S2. List of primers used in this study
Primer name	Locus	Primer use	Forward/Reverse	Sequence
JS_L_97[F]	LOC_Os05g40850	Knockout	F	GTGTGATAACCCTAAAAGTCCACCA
JS_L_98[R]	LOC_Os05g40850	Knockout	R	AAACTGGTGGACTTTTAGGGTTATC
JS_L_120 [F]	LOC_Os05g40850	Overxpression	F	CACCAACTAGCTAGCATGTAGTTCTGC
JS_L_100[R]	LOC_Os05g40850	Overxpression	R	GCAGCTTGATTGATTTCATTCTCTCC
JS_L_107 [F]	LOC_Os05g40850	RT-PCR	F	ACAGCAACACCTGTCGTCTC
JS_L_108 [R]	LOC_Os05g40850	RT-PCR	R	CCACATTATTCGTTGCCGCC
JS_L_109 [F]	LOC_Os05g40850	RT-PCR	F	TGAGGTCTCGTGATCTCGTCG
JS_L_110 [R]	LOC_Os05g40850	RT-PCR	R	ACAGGTGTTGCTGTTGGCT
JS_L_120 [F]	LOC_Os05g40850	Promoter GUS	F	CACCAACTAGCTAGCATGTAGTTCTGC
JS_L_121 [R]	LOC_Os05g40850	Promoter GUS	R	TACGCGGCGCATCAGGGGTAGC
