# Supplementary material for: Rice Chalky Grain 5 regulates natural variation for grain quality under heat stress
Source: Front Plant Sci. 2022 Oct 11;13:1026472. doi: 10.3389/fpls.2022.1026472 (PMC9593041; doi:10.3389/fpls.2022.1026472)
Supplement: Supplementary Table S3 — The number of grains used for each transgenic line for the phenotypic evaluation. [file Table_3.xlsx]

## Sheet: Sheet1
Table S3. Number of grains used for each transgenic lines for the phenotypic evaluation.
Names	Genotype	Replicates	Genotype	Treatment	Number of marked grains
E1_9_C	OE#1	Rep_1	Overexpression	Control	86
E1_10_C	OE#1	Rep_2	Overexpression	Control	42
E1_14_C	OE#1	Rep_4	Overexpression	Control	46
E1_15_C	OE#1	Rep_5	Overexpression	Control	78
E1_6_C	OE#1	Rep_6	Overexpression	Control	43
E1_8_C	OE#1	Rep_7	Overexpression	Control	44
E1_12_S	OE#1	Rep_1	Overexpression	Heat stress	44
E1_13_S	OE#1	Rep_2	Overexpression	Heat stress	122
E1_4_S	OE#1	Rep_3	Overexpression	Heat stress	70
E1_1_S	OE#1	Rep_4	Overexpression	Heat stress	59
E1_16_S	OE#1	Rep_5	Overexpression	Heat stress	51
E1_2_S	OE#1	Rep_6	Overexpression	Heat stress	94
E1_7_S	OE#1	Rep_8	Overexpression	Heat stress	52
E2_1_C	OE#2	Rep_1	Overexpression	Control	44
E2_11_C	OE#2	Rep_2	Overexpression	Control	121
E2_14_C	OE#2	Rep_4	Overexpression	Control	62
E2_16_C	OE#2	Rep_5	Overexpression	Control	43
E2_4_C	OE#2	Rep_6	Overexpression	Control	38
E2_6_C	OE#2	Rep_7	Overexpression	Control	65
E2_10_S	OE#2	Rep_1	Overexpression	Heat stress	31
E2_3_S	OE#2	Rep_2	Overexpression	Heat stress	37
E2_5_S	OE#2	Rep_3	Overexpression	Heat stress	62
E2_7_S	OE#2	Rep_4	Overexpression	Heat stress	77
E2_8_S	OE#2	Rep_6	Overexpression	Heat stress	53
E2_9_S	OE#2	Rep_7	Overexpression	Heat stress	78
E5_12_C	OE#5	Rep_1	Overexpression	Control	53
E5_15_C	KO#5	Rep_2	CRISPR-Cas9 mutant	Control	49
E5_2_C	KO#5	Rep_3	CRISPR-Cas9 mutant	Control	46
E5_3_C	KO#5	Rep_4	CRISPR-Cas9 mutant	Control	37
E5_7_C	KO#5	Rep_6	CRISPR-Cas9 mutant	Control	34
E5_X_C	KO#5	Rep_7	CRISPR-Cas9 mutant	Control	56
E5_1_S	KO#5	Rep_1	CRISPR-Cas9 mutant	Heat stress	65
E5_14_S	KO#5	Rep_2	CRISPR-Cas9 mutant	Heat stress	59
E5_16_S	KO#5	Rep_3	CRISPR-Cas9 mutant	Heat stress	70
E5_6_S	KO#5	Rep_5	CRISPR-Cas9 mutant	Heat stress	37
E5_10_S	KO#5	Rep_7	CRISPR-Cas9 mutant	Heat stress	56
E6_11_C	KO#6	Rep_1	CRISPR-Cas9 mutant	Control	92
E6_14_C	KO#6	Rep_3	CRISPR-Cas9 mutant	Control	69
E6_15_C	KO#6	Rep_4	CRISPR-Cas9 mutant	Control	59
E6_2_C	KO#6	Rep_5	CRISPR-Cas9 mutant	Control	81
E6_4_C	KO#6	Rep_6	CRISPR-Cas9 mutant	Control	68
E6_5_C	KO#6	Rep_7	CRISPR-Cas9 mutant	Control	51
E6_9_C	KO#6	Rep_8	CRISPR-Cas9 mutant	Control	67
E6_1_S	KO#6	Rep_1	CRISPR-Cas9 mutant	Heat stress	67
E6_13_S	KO#6	Rep_2	CRISPR-Cas9 mutant	Heat stress	63
E6_3_S	KO#6	Rep_3	CRISPR-Cas9 mutant	Heat stress	46
E6_6_S	KO#6	Rep_4	CRISPR-Cas9 mutant	Heat stress	96
E6_7_S	KO#6	Rep_5	CRISPR-Cas9 mutant	Heat stress	56
E6_10_S	KO#6	Rep_6	CRISPR-Cas9 mutant	Heat stress	77
E6_16_S	KO#6	Rep_7	CRISPR-Cas9 mutant	Heat stress	74
K10_C	Kit	Rep_1	Wild-type	Control	71
K15_C	Kit	Rep_2	Wild-type	Control	77
K3_C	Kit	Rep_3	Wild-type	Control	56
K4_C	Kit	Rep_4	Wild-type	Control	93
K6_C	Kit	Rep_6	Wild-type	Control	50
K8_C	Kit	Rep_7	Wild-type	Control	52
K9_C	Kit	Rep_8	Wild-type	Control	68
K1_S	Kit	Rep_1	Wild-type	Heat stress	22
K11_S	Kit	Rep_2	Wild-type	Heat stress	66
K12_S	Kit	Rep_3	Wild-type	Heat stress	81
K13_S	Kit	Rep_4	Wild-type	Heat stress	67
K14_S	Kit	Rep_5	Wild-type	Heat stress	71
K16_S	Kit	Rep_7	Wild-type	Heat stress	60
K2_S	Kit	Rep_8	Wild-type	Heat stress	84
					Total: 3988
