# Supplementary material for: Rice Chalky Grain 5 regulates natural variation for grain quality under heat stress
Source: Front Plant Sci. 2022 Oct 11;13:1026472. doi: 10.3389/fpls.2022.1026472 (PMC9593041; doi:10.3389/fpls.2022.1026472)
Supplement: Supplementary Table S4 — Distribution of the ratio of red to green pixels (RG) under control and heat stress (HS) along with their percentage change (HS/Control) among the selected accessions from rice diversity panel 1. [file Table_4.xlsx]

## Sheet: Sheet1
Table S4. Distribution of Red to Green (RG) values under control and heat stress (HS) along with their ratio (RG HS/Control) and percentage change among the selected accessions in rice diversity panel 1
GSOR_Id	NSFTV_Id	RGcontrol	RGHS	RGHS/control	% change
301317	NSFTV_327	1.42771	1.24724	0.873593	-12.6407
301037	NSFTV_39	1.24705	1.11107	0.89096	-10.904
301041	NSFTV_44	1.1717	1.06148	0.905928	-9.40718
301336	NSFTV_346	1.1599	1.06651	0.919478	-8.05217
301074	NSFTV_81	1.14367	1.05431	0.921865	-7.8135
301294	NSFTV_304	1.49572	1.38479	0.92583	-7.41697
301252	NSFTV_262	1.18102	1.09748	0.929266	-7.07341
301331	NSFTV_341	1.16498	1.08442	0.930845	-6.91553
301302	NSFTV_312	1.41995	1.32217	0.931138	-6.88624
301054	NSFTV_58	1.11867	1.06158	0.948962	-5.1038
301215	NSFTV_224	1.46883	1.4033	0.955384	-4.46157
301366	NSFTV_381	1.1293	1.08258	0.958628	-4.13719
301014	NSFTV_16	1.10886	1.06527	0.960687	-3.93129
301204	NSFTV_213	1.23223	1.18569	0.962234	-3.77662
301219	NSFTV_228	1.22656	1.18077	0.962665	-3.73352
301295	NSFTV_305	1.1108	1.06962	0.962929	-3.70711
301356	NSFTV_369	1.19488	1.15149	0.963686	-3.63136
301071	NSFTV_78	1.13232	1.09205	0.964436	-3.55636
301197	NSFTV_206	1.08526	1.04774	0.965424	-3.45763
301057	NSFTV_61	1.12068	1.08367	0.96697	-3.30297
301003	NSFTV_3	1.08356	1.04864	0.967773	-3.22273
301364	NSFTV_379	1.08843	1.05368	0.968078	-3.19224
301200	NSFTV_209	1.10901	1.07623	0.970443	-2.95572
301015	NSFTV_17	1.11015	1.0783	0.971312	-2.86876
301190	NSFTV_199	1.08017	1.05145	0.97341	-2.659
301081	NSFTV_89	1.0789	1.05086	0.974009	-2.59913
301213	NSFTV_222	1.07782	1.04981	0.974018	-2.59824
301112	NSFTV_120	1.07624	1.04911	0.974787	-2.52127
301147	NSFTV_156	1.11121	1.0834	0.974972	-2.50279
301009	NSFTV_9	1.10533	1.07945	0.976579	-2.34212
301208	NSFTV_217	1.08884	1.06376	0.976965	-2.30353
301357	NSFTV_370	1.12161	1.09602	0.977188	-2.28124
301141	NSFTV_150	1.10073	1.07566	0.977223	-2.27766
301189	NSFTV_198	1.08765	1.063	0.977344	-2.26558
301152	NSFTV_161	1.15252	1.12739	0.978198	-2.18019
301012	NSFTV_13	1.0951	1.07126	0.978232	-2.17677
301306	NSFTV_316	1.10153	1.07759	0.978265	-2.17347
301339	NSFTV_349	1.11417	1.09024	0.978524	-2.14759
301004	NSFTV_4	1.0936	1.07139	0.979689	-2.03109
301146	NSFTV_155	1.10304	1.08154	0.980509	-1.9491
301067	NSFTV_74	1.09011	1.06931	0.980918	-1.90817
301023	NSFTV_25	1.08399	1.06515	0.982615	-1.73847
301116	NSFTV_125	1.13321	1.11401	0.983063	-1.69367
301230	NSFTV_240	1.09276	1.07444	0.983235	-1.67647
301051	NSFTV_55	1.0777	1.05977	0.983364	-1.66357
301085	NSFTV_93	1.09582	1.07767	0.983433	-1.6567
301045	NSFTV_49	1.52915	1.50402	0.983564	-1.64358
301156	NSFTV_165	1.06801	1.05078	0.983865	-1.61349
301244	NSFTV_254	1.10823	1.09058	0.98407	-1.59304
301069	NSFTV_76	1.08659	1.06936	0.984141	-1.58593
301144	NSFTV_153	1.06253	1.04589	0.984341	-1.56594
301151	NSFTV_160	1.07499	1.05827	0.984446	-1.55535
301232	NSFTV_242	1.06184	1.04556	0.984669	-1.53308
301307	NSFTV_317	1.38147	1.3603	0.984674	-1.53256
301195	NSFTV_204	1.09295	1.0763	0.984771	-1.52286
301182	NSFTV_191	1.07266	1.05729	0.985666	-1.43339
301358	NSFTV_371	1.08309	1.06762	0.985713	-1.42868
301251	NSFTV_261	1.13976	1.12385	0.986044	-1.39558
301024	NSFTV_26	1.06659	1.05178	0.986119	-1.38815
301084	NSFTV_92	1.06941	1.05522	0.986731	-1.32692
301287	NSFTV_297	1.11026	1.09563	0.98682	-1.31802
301271	NSFTV_281	1.09958	1.08517	0.986897	-1.31032
301337	NSFTV_347	1.06134	1.04799	0.987429	-1.25706
301196	NSFTV_205	1.11307	1.09923	0.987567	-1.24334
301407	NSFTV_623	1.08527	1.07251	0.988239	-1.17607
301092	NSFTV_100	1.10484	1.09196	0.988343	-1.16573
301068	NSFTV_75	1.05963	1.04728	0.988346	-1.16536
301145	NSFTV_154	1.07095	1.0587	0.988563	-1.14369
301010	NSFTV_10	1.10096	1.08843	0.988623	-1.13766
301158	NSFTV_167	1.07519	1.06296	0.988629	-1.13713
301155	NSFTV_164	1.06302	1.05095	0.988644	-1.13558
301031	NSFTV_33	1.06747	1.05555	0.988833	-1.11673
301076	NSFTV_84	1.06715	1.05544	0.989022	-1.09782
301184	NSFTV_193	1.07257	1.06096	0.989179	-1.08212
301005	NSFTV_5	1.07781	1.06684	0.989827	-1.01731
301042	NSFTV_45	1.07135	1.06073	0.990086	-0.991425
301143	NSFTV_152	1.07798	1.06741	0.990189	-0.981124
301183	NSFTV_192	1.10986	1.09898	0.990199	-0.98008
301125	NSFTV_134	1.10436	1.09371	0.990348	-0.965177
301043	NSFTV_46	1.07119	1.06144	0.990901	-0.909893
301374	NSFTV_391	1.07514	1.06543	0.99097	-0.902952
301157	NSFTV_166	1.101	1.09127	0.991156	-0.884372
301025	NSFTV_27	1.07745	1.06812	0.991338	-0.866244
301224	NSFTV_234	1.0749	1.06561	0.991356	-0.864438
301338	NSFTV_348	1.07438	1.06522	0.991475	-0.852543
301072	NSFTV_79	1.11354	1.10433	0.991729	-0.827103
301120	NSFTV_129	1.136	1.12666	0.991778	-0.822236
301324	NSFTV_334	1.11961	1.11042	0.991798	-0.820165
301019	NSFTV_21	1.0693	1.06079	0.992042	-0.795777
301192	NSFTV_201	1.06925	1.06075	0.992049	-0.79512
301274	NSFTV_284	1.0954	1.08718	0.992496	-0.750401
301209	NSFTV_218	1.0752	1.06786	0.993176	-0.682379
301106	NSFTV_114	1.08128	1.07404	0.993301	-0.669897
301177	NSFTV_186	1.08472	1.07758	0.99342	-0.658034
301058	NSFTV_65	1.05444	1.04756	0.993479	-0.652062
301163	NSFTV_172	1.08539	1.07848	0.993626	-0.637429
301217	NSFTV_226	1.08628	1.07984	0.994072	-0.592833
301066	NSFTV_73	1.08305	1.07682	0.994253	-0.574657
301001	NSFTV_1	1.08437	1.07851	0.994601	-0.539875
301027	NSFTV_29	1.09073	1.08529	0.995013	-0.498672
301121	NSFTV_130	1.13311	1.12786	0.995364	-0.463639
301096	NSFTV_104	1.09582	1.091	0.995605	-0.439495
301174	NSFTV_183	1.0634	1.05895	0.995811	-0.418869
301168	NSFTV_177	1.08313	1.0787	0.995911	-0.408876
301130	NSFTV_139	1.07696	1.07262	0.995969	-0.403093
301040	NSFTV_43	1.07757	1.07364	0.996357	-0.36429
301238	NSFTV_248	1.07586	1.07214	0.996543	-0.345703
301348	NSFTV_360	1.43483	1.43036	0.996885	-0.311537
301292	NSFTV_302	1.12402	1.12076	0.997092	-0.29075
301216	NSFTV_225	1.09343	1.09032	0.997152	-0.284754
301311	NSFTV_321	1.08272	1.07967	0.997175	-0.282466
301369	NSFTV_386	1.076	1.07311	0.997312	-0.268753
301273	NSFTV_283	1.1137	1.11071	0.997313	-0.268653
301378	NSFTV_395	1.07573	1.07291	0.997383	-0.261743
301406	NSFTV_620	1.10354	1.10111	0.997796	-0.220446
301226	NSFTV_236	1.06904	1.06685	0.997951	-0.204888
301235	NSFTV_245	1.07265	1.07063	0.998119	-0.188143
301115	NSFTV_123	1.12755	1.12574	0.998402	-0.159788
301263	NSFTV_273	1.06422	1.06265	0.998522	-0.147786
301082	NSFTV_90	1.11725	1.11727	1.00002	0.00211878
301148	NSFTV_157	1.08857	1.08865	1.00007	0.00717546
301222	NSFTV_232	1.09051	1.09066	1.00014	0.0138189
301303	NSFTV_313	1.09422	1.09454	1.00029	0.0291777
301343	NSFTV_355	1.10114	1.10162	1.00043	0.0434774
301052	NSFTV_56	1.08461	1.08541	1.00074	0.0738228
301282	NSFTV_292	1.09992	1.10083	1.00082	0.0818413
301405	NSFTV_619	1.08203	1.08342	1.00128	0.128426
301316	NSFTV_326	1.07965	1.0811	1.00135	0.134716
301323	NSFTV_333	1.11685	1.11897	1.0019	0.189758
301329	NSFTV_339	1.05125	1.05334	1.00198	0.198072
301055	NSFTV_59	1.09134	1.0944	1.00281	0.280692
301095	NSFTV_103	1.10818	1.11135	1.00286	0.28604
301075	NSFTV_83	1.07814	1.08132	1.00295	0.294947
301380	NSFTV_397	1.08909	1.09267	1.00328	0.328156
301062	NSFTV_69	1.06556	1.06973	1.00392	0.392038
301089	NSFTV_97	1.07835	1.08305	1.00435	0.435392
301105	NSFTV_113	1.09103	1.09589	1.00446	0.445752
301231	NSFTV_241	1.07311	1.07816	1.00471	0.470712
301098	NSFTV_106	1.07854	1.08406	1.00512	0.512177
301229	NSFTV_239	1.1337	1.1396	1.0052	0.519917
301351	NSFTV_364	1.10431	1.11011	1.00525	0.525401
301122	NSFTV_131	1.07905	1.08495	1.00547	0.546846
301162	NSFTV_171	1.06339	1.06944	1.00569	0.568775
301301	NSFTV_311	1.08852	1.09475	1.00572	0.571648
301240	NSFTV_250	1.1209	1.12752	1.0059	0.590357
301053	NSFTV_57	1.10804	1.11475	1.00606	0.605551
301285	NSFTV_295	1.09982	1.10684	1.00638	0.637826
301261	NSFTV_271	1.06284	1.0701	1.00683	0.683023
301038	NSFTV_40	1.04359	1.05099	1.00709	0.709469
301255	NSFTV_265	1.08056	1.08833	1.00719	0.718673
301233	NSFTV_243	1.07463	1.08277	1.00757	0.757219
301171	NSFTV_180	1.0684	1.07785	1.00884	0.883978
301093	NSFTV_101	1.0629	1.07238	1.00892	0.892074
301312	NSFTV_322	1.0833	1.09381	1.0097	0.96986
301291	NSFTV_301	1.10256	1.11403	1.0104	1.04014
301113	NSFTV_121	1.08622	1.09797	1.01081	1.08149
301020	NSFTV_22	1.08104	1.09338	1.01142	1.14221
301278	NSFTV_288	1.11236	1.1252	1.01154	1.15395
301247	NSFTV_257	1.09689	1.11148	1.0133	1.32971
301327	NSFTV_337	1.10218	1.11732	1.01373	1.37331
301109	NSFTV_117	1.09756	1.11365	1.01466	1.46584
301079	NSFTV_87	1.03603	1.05163	1.01506	1.506
301253	NSFTV_263	1.09279	1.10931	1.01512	1.5117
301214	NSFTV_223	1.07855	1.09566	1.01587	1.58702
301279	NSFTV_289	1.10148	1.11973	1.01656	1.65644
301269	NSFTV_279	1.10841	1.12689	1.01668	1.66797
301225	NSFTV_235	1.1034	1.12203	1.01689	1.68878
301220	NSFTV_229	1.10462	1.12378	1.01734	1.73446
301308	NSFTV_318	1.38415	1.40823	1.0174	1.73988
301227	NSFTV_237	1.10091	1.12129	1.01851	1.85133
301210	NSFTV_219	1.08261	1.10325	1.01906	1.9062
301256	NSFTV_266	1.0876	1.10889	1.01957	1.95737
301170	NSFTV_179	1.06722	1.08971	1.02107	2.10748
301254	NSFTV_264	1.08421	1.10924	1.02309	2.30927
301265	NSFTV_275	1.11585	1.14226	1.02367	2.36702
301223	NSFTV_233	1.08103	1.10703	1.02405	2.40497
301325	NSFTV_335	1.06495	1.0927	1.02605	2.60549
301221	NSFTV_231	1.09697	1.13041	1.03048	3.04817
301310	NSFTV_320	1.48892	1.55373	1.04353	4.35281
301296	NSFTV_306	1.04315	1.09133	1.04619	4.61877
301322	NSFTV_332	1.39226	1.46097	1.04935	4.93538
301288	NSFTV_298	1.44731	1.52192	1.05155	5.15521
301344	NSFTV_356	1.06691	1.12751	1.0568	5.68012
301264	NSFTV_274	1.37686	1.4555	1.05712	5.71178
301341	NSFTV_353	1.40753	1.49112	1.05939	5.93882
301363	NSFTV_378	1.24515	1.32606	1.06498	6.49794
301321	NSFTV_331	1.3487	1.43646	1.06507	6.50719
301046	NSFTV_50	1.25982	1.34418	1.06697	6.69669
301245	NSFTV_255	1.29486	1.41342	1.09156	9.15624
301160	NSFTV_169	1.04402	1.14502	1.09674	9.67409
301320	NSFTV_330	1.43124	1.5702	1.09709	9.70928
301335	NSFTV_345	1.39781	1.55611	1.11325	11.3247
301017	NSFTV_19	1.2673	1.47452	1.16352	16.3519
