# Supplementary material for: Rice Chalky Grain 5 regulates natural variation for grain quality under heat stress
Source: Front Plant Sci. 2022 Oct 11;13:1026472. doi: 10.3389/fpls.2022.1026472 (PMC9593041; doi:10.3389/fpls.2022.1026472)
Supplement: Supplementary Table S5 — Details of significant SNPs and their associated locus (10kb upstream and downstream) under control and heat stress. [file Table_5.xlsx]

## Sheet: Sheet1
Table S5. Details of significant SNPs and their associated locus (10kb upstream and downstream) under control and heat stress.
Category	SNP id	Position	–log10 (p-value)	Major	Minor	Type	R2 Value	Locus	Chromosome	Featured expression
SNP-11.21577974.	RG Control	22044104	10.9664	C	A	C/A	0.00565957	LOC_Os11g37300	Chr11
SNP-11.21577974.	RG Control	22044104	10.9664	C	A	C/A	0.00565957	LOC_Os11g37310	Chr11
SNP-11.21577974.	RG Control	22044104	10.9664	C	A	C/A	0.00565957	LOC_Os11g37320	Chr11
SNP-11.21577974.	RG Control	22044104	10.9664	C	A	C/A	0.00565957	LOC_Os11g37330	Chr11	Heat stress induced
SNP-11.21577974.	RG Control	22044104	10.9664	C	A	C/A	0.00565957	LOC_Os11g37330	Chr11	Heat stress induced
SNP-11.21577974.	RG Control	22044104	10.9664	C	A	C/A	0.00565957	LOC_Os11g37340	Chr11
SNP-11.21577974.	RG Control	22044104	10.9664	C	A	C/A	0.00565957	LOC_Os11g37350	Chr11
SNP-11.21577974.	RG Control	22044104	10.9664	C	A	C/A	0.00565957	LOC_Os11g37360	Chr11
SNP-11.21577974.	RG Control	22044104	10.9664	C	A	C/A	0.00565957	LOC_Os11g37370	Chr11
SNP-11.21577974.	RG Control	22044104	10.9664	C	A	C/A	0.00565957	LOC_Os11g37380	Chr11
SNP-5.22138301.	RG Control	22200861	9.40222	G	A	G/A	0.0107421	LOC_Os05g37870	Chr5
SNP-5.22138301.	RG Control	22200861	9.40222	G	A	G/A	0.0107421	LOC_Os05g37880	Chr5
SNP-5.22138301.	RG Control	22200861	9.40222	G	A	G/A	0.0107421	LOC_Os05g37884	Chr5
SNP-5.22138301.	RG Control	22200861	9.40222	G	A	G/A	0.0107421	LOC_Os05g37890	Chr5
SNP-5.22138301.	RG Control	22200861	9.40222	G	A	G/A	0.0107421	LOC_Os05g37900	Chr5
SNP-5.22138301.	RG Control	22200861	9.40222	G	A	G/A	0.0107421	LOC_Os05g37910	Chr5
SNP-5.22138301.	RG Control	22200861	9.40222	G	A	G/A	0.0107421	LOC_Os05g37910	Chr5
SNP-5.12302463.	RG Control	12302534	9.0115	G	A	G/A	0.00358498	LOC_Os05g20914	Chr5
SNP-5.12302463.	RG Control	12302534	9.0115	G	A	G/A	0.00358498	LOC_Os05g20914	Chr5
SNP-5.12302463.	RG Control	12302534	9.0115	G	A	G/A	0.00358498	LOC_Os05g20914	Chr5
SNP-5.12302463.	RG Control	12302534	9.0115	G	A	G/A	0.00358498	LOC_Os05g20920	Chr5
SNP-5.12302463.	RG Control	12302534	9.0115	G	A	G/A	0.00358498	LOC_Os05g20930	Chr5
SNP-5.12302463.	RG Control	12302534	9.0115	G	A	G/A	0.00358498	LOC_Os05g20940	Chr5
SNP-5.12302463.	RG Control	12302534	9.0115	G	A	G/A	0.00358498	LOC_Os05g20950	Chr5
SNP-1.42949271.	RG Control	42950316	8.62185	C	T	C/T	0.00805479	LOC_Os01g74130	Chr1
SNP-1.42949271.	RG Control	42950316	8.62185	C	T	C/T	0.00805479	LOC_Os01g74140	Chr1	Developing grain
SNP-1.42949271.	RG Control	42950316	8.62185	C	T	C/T	0.00805479	LOC_Os01g74146	Chr1	Heat stress induced
SNP-1.42949271.	RG Control	42950316	8.62185	C	T	C/T	0.00805479	LOC_Os01g74152	Chr1
SNP-1.42949271.	RG Control	42950316	8.62185	C	T	C/T	0.00805479	LOC_Os01g74160	Chr1
SNP-1.42949271.	RG Control	42950316	8.62185	C	T	C/T	0.00805479	LOC_Os01g74170	Chr1
SNP-12.26533846.	RG Control	26567452	8.49856	C	T	C/T	0.00215387	LOC_Os12g42720	Chr12
SNP-12.26533846.	RG Control	26567452	8.49856	C	T	C/T	0.00215387	LOC_Os12g42730	Chr12
SNP-12.26533846.	RG Control	26567452	8.49856	C	T	C/T	0.00215387	LOC_Os12g42730	Chr12
SNP-12.26533846.	RG Control	26567452	8.49856	C	T	C/T	0.00215387	LOC_Os12g42730	Chr12
SNP-12.26533846.	RG Control	26567452	8.49856	C	T	C/T	0.00215387	LOC_Os12g42730	Chr12
SNP-12.26533846.	RG Control	26567452	8.49856	C	T	C/T	0.00215387	LOC_Os12g42739	Chr12
SNP-12.26533846.	RG Control	26567452	8.49856	C	T	C/T	0.00215387	LOC_Os12g42750	Chr12
SNP-12.26533846.	RG Control	26567452	8.49856	C	T	C/T	0.00215387	LOC_Os12g42760	Chr12
SNP-12.26533846.	RG Control	26567452	8.49856	C	T	C/T	0.00215387	LOC_Os12g42770	Chr12
SNP-12.26533846.	RG Control	26567452	8.49856	C	T	C/T	0.00215387	LOC_Os12g42780	Chr12
SNP-1.33799706.	RG Control	33800751	8.23479	G	A	G/A	0.00715034	LOC_Os01g58444	Chr1
SNP-1.33799706.	RG Control	33800751	8.23479	G	A	G/A	0.00715034	LOC_Os01g58450	Chr1
SNP-1.33799706.	RG Control	33800751	8.23479	G	A	G/A	0.00715034	LOC_Os01g58459	Chr1
SNP-1.33799706.	RG Control	33800751	8.23479	G	A	G/A	0.00715034	LOC_Os01g58459	Chr1
SNP-1.33799706.	RG Control	33800751	8.23479	G	A	G/A	0.00715034	LOC_Os01g58470	Chr1	Developing grain
SNP-1.33799706.	RG Control	33800751	8.23479	G	A	G/A	0.00715034	LOC_Os01g58480	Chr1
SNP-1.33799706.	RG Control	33800751	8.23479	G	A	G/A	0.00715034	LOC_Os01g58490	Chr1
SNP-1.33799706.	RG Control	33800751	8.23479	G	A	G/A	0.00715034	LOC_Os01g58500	Chr1	Developing grain
SNP-1.33799706.	RG Control	33800751	8.23479	G	A	G/A	0.00715034	LOC_Os01g58510	Chr1
SNP-1.33799706.	RG Control	33800751	8.23479	G	A	G/A	0.00715034	LOC_Os01g58520	Chr1
SNP-4.4329086.	RG Control	4333482	8.08522	C	T	C/T	0.00405842	LOC_Os04g08080	Chr4
SNP-4.4329086.	RG Control	4333482	8.08522	C	T	C/T	0.00405842	LOC_Os04g08110	Chr4
SNP-4.4329086.	RG Control	4333482	8.08522	C	T	C/T	0.00405842	LOC_Os04g08120	Chr4
SNP-4.4329086.	RG Control	4333482	8.08522	C	T	C/T	0.00405842	LOC_Os04g08130	Chr4
SNP-4.4329086.	RG Control	4333482	8.08522	C	T	C/T	0.00405842	LOC_Os04g08150	Chr4
SNP-4.4329086.	RG Control	4333482	8.08522	C	T	C/T	0.00405842	LOC_Os04g08160	Chr4
SNP-4.4329086.	RG Control	4333482	8.08522	C	T	C/T	0.00405842	LOC_Os04g08170	Chr4
SNP-4.4329086.	RG Control	4333482	8.08522	C	T	C/T	0.00405842	LOC_Os04g08180	Chr4
SNP-4.4329086.	RG Control	4333482	8.08522	C	T	C/T	0.00405842	LOC_Os04g08190	Chr4
SNP-7.3771779.	RG Control	3772779	8.00668	G	A	G/A	0.00706873	LOC_Os07g07530	Chr7
SNP-7.3771779.	RG Control	3772779	8.00668	G	A	G/A	0.00706873	LOC_Os07g07540	Chr7
SNP-7.3771779.	RG Control	3772779	8.00668	G	A	G/A	0.00706873	LOC_Os07g07550	Chr7
SNP-7.3771779.	RG Control	3772779	8.00668	G	A	G/A	0.00706873	LOC_Os07g07560	Chr7
SNP-7.3771779.	RG Control	3772779	8.00668	G	A	G/A	0.00706873	LOC_Os07g07560	Chr7
SNP-7.3771779.	RG Control	3772779	8.00668	G	A	G/A	0.00706873	LOC_Os07g07570	Chr7
SNP-7.10254777.	RG Control	10255772	7.86858	C	T	C/T	0.000393393	LOC_Os07g17340	Chr7
SNP-7.10254777.	RG Control	10255772	7.86858	C	T	C/T	0.000393393	LOC_Os07g17350	Chr7
SNP-7.10254777.	RG Control	10255772	7.86858	C	T	C/T	0.000393393	LOC_Os07g17360	Chr7
SNP-7.10254777.	RG Control	10255772	7.86858	C	T	C/T	0.000393393	LOC_Os07g17360	Chr7
SNP-7.10254777.	RG Control	10255772	7.86858	C	T	C/T	0.000393393	LOC_Os07g17370	Chr7
SNP-7.10254777.	RG Control	10255772	7.86858	C	T	C/T	0.000393393	LOC_Os07g17380	Chr7
SNP-7.10254777.	RG Control	10255772	7.86858	C	T	C/T	0.000393393	LOC_Os07g17390	Chr7
SNP-7.10254777.	RG Control	10255772	7.86858	C	T	C/T	0.000393393	LOC_Os07g17400	Chr7
SNP-7.10254777.	RG Control	10255772	7.86858	C	T	C/T	0.000393393	LOC_Os07g17400	Chr7
SNP-8.11503138.	RG Control	11504134	7.81277	T	C	T/C	0.00181864	LOC_Os08g19210	Chr8	Heat stress induced
SNP-8.11503138.	RG Control	11504134	7.81277	T	C	T/C	0.00181864	LOC_Os08g19210	Chr8	Heat stress induced
SNP-8.11503138.	RG Control	11504134	7.81277	T	C	T/C	0.00181864	LOC_Os08g19220	Chr8
SNP-8.11503138.	RG Control	11504134	7.81277	T	C	T/C	0.00181864	LOC_Os08g19230	Chr8
SNP-8.11503138.	RG Control	11504134	7.81277	T	C	T/C	0.00181864	LOC_Os08g19240	Chr8
SNP-8.11503138.	RG Control	11504134	7.81277	T	C	T/C	0.00181864	LOC_Os08g19250	Chr8
SNP-8.11503138.	RG Control	11504134	7.81277	T	C	T/C	0.00181864	LOC_Os08g19260	Chr8
SNP-5.5183454.	RG Control	5183477	7.65557	C	T	C/T	0.00617585	LOC_Os05g09250	Chr5
SNP-5.5183454.	RG Control	5183477	7.65557	C	T	C/T	0.00617585	LOC_Os05g09260	Chr5
SNP-5.5183454.	RG Control	5183477	7.65557	C	T	C/T	0.00617585	LOC_Os05g09270	Chr5
SNP-5.5183454.	RG Control	5183477	7.65557	C	T	C/T	0.00617585	LOC_Os05g09280	Chr5
SNP-5.5183454.	RG Control	5183477	7.65557	C	T	C/T	0.00617585	LOC_Os05g09290	Chr5
SNP-5.5183454.	RG Control	5183477	7.65557	C	T	C/T	0.00617585	LOC_Os05g09300	Chr5
SNP-5.5183454.	RG Control	5183477	7.65557	C	T	C/T	0.00617585	LOC_Os05g09310	Chr5
SNP-11.17404960.	RG Control	17871105	7.65486	T	A	T/A	0.00556491	LOC_Os11g30660	Chr11
SNP-11.17404960.	RG Control	17871105	7.65486	T	A	T/A	0.00556491	LOC_Os11g30670	Chr11
SNP-11.17404960.	RG Control	17871105	7.65486	T	A	T/A	0.00556491	LOC_Os11g30690	Chr11
SNP-11.17404960.	RG Control	17871105	7.65486	T	A	T/A	0.00556491	LOC_Os11g30700	Chr11
SNP-11.17404960.	RG Control	17871105	7.65486	T	A	T/A	0.00556491	LOC_Os11g30720	Chr11
SNP-12.9855272.	RG Control	9857863	7.57952	A	T	A/T	0.00351925	LOC_Os12g17180	Chr12
SNP-12.9855272.	RG Control	9857863	7.57952	A	T	A/T	0.00351925	LOC_Os12g17190	Chr12
SNP-12.9855272.	RG Control	9857863	7.57952	A	T	A/T	0.00351925	LOC_Os12g17200	Chr12
SNP-12.9855272.	RG Control	9857863	7.57952	A	T	A/T	0.00351925	LOC_Os12g17210	Chr12
SNP-12.9855272.	RG Control	9857863	7.57952	A	T	A/T	0.00351925	LOC_Os12g17220	Chr12
SNP-12.9855272.	RG Control	9857863	7.57952	A	T	A/T	0.00351925	LOC_Os12g17230	Chr12
SNP-12.9855272.	RG Control	9857863	7.57952	A	T	A/T	0.00351925	LOC_Os12g17240	Chr12
SNP-12.9855272.	RG Control	9857863	7.57952	A	T	A/T	0.00351925	LOC_Os12g17250	Chr12
SNP-7.11306434.	RG Control	11307429	7.52755	C	T	C/T	0.00206559	LOC_Os07g19070	Chr7
SNP-7.11306434.	RG Control	11307429	7.52755	C	T	C/T	0.00206559	LOC_Os07g19070	Chr7
SNP-7.11306434.	RG Control	11307429	7.52755	C	T	C/T	0.00206559	LOC_Os07g19080	Chr7
SNP-7.11306434.	RG Control	11307429	7.52755	C	T	C/T	0.00206559	LOC_Os07g19090	Chr7
SNP-7.11306434.	RG Control	11307429	7.52755	C	T	C/T	0.00206559	LOC_Os07g19110	Chr7
SNP-7.11306434.	RG Control	11307429	7.52755	C	T	C/T	0.00206559	LOC_Os07g19120	Chr7
SNP-7.11306434.	RG Control	11307429	7.52755	C	T	C/T	0.00206559	LOC_Os07g19130	Chr7
SNP-11.20814554.	RG Control	21280677	7.44385	C	T	C/T	0.00489692	LOC_Os11g36160	Chr11
SNP-11.20814554.	RG Control	21280677	7.44385	C	T	C/T	0.00489692	LOC_Os11g36160	Chr11
SNP-11.20814554.	RG Control	21280677	7.44385	C	T	C/T	0.00489692	LOC_Os11g36170	Chr11
SNP-11.20814554.	RG Control	21280677	7.44385	C	T	C/T	0.00489692	LOC_Os11g36180	Chr11
SNP-11.20814554.	RG Control	21280677	7.44385	C	T	C/T	0.00489692	LOC_Os11g36190	Chr11
SNP-11.20814554.	RG Control	21280677	7.44385	C	T	C/T	0.00489692	LOC_Os11g36190	Chr11
SNP-11.20814554.	RG Control	21280677	7.44385	C	T	C/T	0.00489692	LOC_Os11g36200	Chr11
SNP-11.20814554.	RG Control	21280677	7.44385	C	T	C/T	0.00489692	LOC_Os11g36200	Chr11
SNP-5.7720608.	RG Control	7720668	7.38154	G	C	G/C	0.00134754	LOC_Os05g13860	Chr5
SNP-5.7720608.	RG Control	7720668	7.38154	G	C	G/C	0.00134754	LOC_Os05g13870	Chr5
SNP-5.7720608.	RG Control	7720668	7.38154	G	C	G/C	0.00134754	LOC_Os05g13880	Chr5
SNP-5.7720608.	RG Control	7720668	7.38154	G	C	G/C	0.00134754	LOC_Os05g13890	Chr5
SNP-5.7720608.	RG Control	7720668	7.38154	G	C	G/C	0.00134754	LOC_Os05g13900	Chr5
SNP-5.7720608.	RG Control	7720668	7.38154	G	C	G/C	0.00134754	LOC_Os05g13904	Chr5
SNP-5.7720608.	RG Control	7720668	7.38154	G	C	G/C	0.00134754	LOC_Os05g13910	Chr5
SNP-5.7720608.	RG Control	7720668	7.38154	G	C	G/C	0.00134754	LOC_Os05g13920	Chr5
SNP-8.4046739.	RG Control	4047737	7.35599	T	C	T/C	0.00138285	LOC_Os08g07220	Chr8
SNP-8.4046739.	RG Control	4047737	7.35599	T	C	T/C	0.00138285	LOC_Os08g07230	Chr8
SNP-8.4046739.	RG Control	4047737	7.35599	T	C	T/C	0.00138285	LOC_Os08g07240	Chr8
SNP-8.4046739.	RG Control	4047737	7.35599	T	C	T/C	0.00138285	LOC_Os08g07260	Chr8
SNP-8.4046739.	RG Control	4047737	7.35599	T	C	T/C	0.00138285	LOC_Os08g07270	Chr8
SNP-8.4046739.	RG Control	4047737	7.35599	T	C	T/C	0.00138285	LOC_Os08g07280	Chr8
SNP-1.32160021.	RG Control	32161066	7.27665	G	T	G/T	0.0125818	LOC_Os01g55795	Chr1
SNP-1.32160021.	RG Control	32161066	7.27665	G	T	G/T	0.0125818	LOC_Os01g55799	Chr1
SNP-1.32160021.	RG Control	32161066	7.27665	G	T	G/T	0.0125818	LOC_Os01g55799	Chr1
SNP-1.32160021.	RG Control	32161066	7.27665	G	T	G/T	0.0125818	LOC_Os01g55799	Chr1
SNP-1.32160021.	RG Control	32161066	7.27665	G	T	G/T	0.0125818	LOC_Os01g55820	Chr1
SNP-1.32160021.	RG Control	32161066	7.27665	G	T	G/T	0.0125818	LOC_Os01g55830	Chr1
SNP-1.32160021.	RG Control	32161066	7.27665	G	T	G/T	0.0125818	LOC_Os01g55840	Chr1
SNP-1.32160021.	RG Control	32161066	7.27665	G	T	G/T	0.0125818	LOC_Os01g55850	Chr1
SNP-1.32160021.	RG Control	32161066	7.27665	G	T	G/T	0.0125818	LOC_Os01g55860	Chr1
SNP-1.32160021.	RG Control	32161066	7.27665	G	T	G/T	0.0125818	LOC_Os01g55870	Chr1
SNP-1.32160021.	RG Control	32161066	7.27665	G	T	G/T	0.0125818	LOC_Os01g55880	Chr1
SNP-4.22656836.	RG Control	22841954	7.03332	G	T	G/T	0.00775902	LOC_Os04g38370	Chr4
SNP-4.22656836.	RG Control	22841954	7.03332	G	T	G/T	0.00775902	LOC_Os04g38380	Chr4
SNP-4.22656836.	RG Control	22841954	7.03332	G	T	G/T	0.00775902	LOC_Os04g38390	Chr4
SNP-4.22656836.	RG Control	22841954	7.03332	G	T	G/T	0.00775902	LOC_Os04g38400	Chr4
SNP-4.22656836.	RG Control	22841954	7.03332	G	T	G/T	0.00775902	LOC_Os04g38410	Chr4
SNP-4.22656836.	RG Control	22841954	7.03332	G	T	G/T	0.00775902	LOC_Os04g38420	Chr4
SNP-4.22656836.	RG Control	22841954	7.03332	G	T	G/T	0.00775902	LOC_Os04g38430	Chr4
SNP-4.22656836.	RG Control	22841954	7.03332	G	T	G/T	0.00775902	LOC_Os04g38430	Chr4
SNP-4.22656836.	RG Control	22841954	7.03332	G	T	G/T	0.00775902	LOC_Os04g38450	Chr4
SNP-7.12379205.	RG Control	12380199	6.97201	C	T	C/T	0.0087329	LOC_Os07g22120	Chr7
SNP-7.12379205.	RG Control	12380199	6.97201	C	T	C/T	0.0087329	LOC_Os07g22129	Chr7
SNP-7.12379205.	RG Control	12380199	6.97201	C	T	C/T	0.0087329	LOC_Os07g22140	Chr7
SNP-7.12379205.	RG Control	12380199	6.97201	C	T	C/T	0.0087329	LOC_Os07g22150	Chr7
SNP-7.12379205.	RG Control	12380199	6.97201	C	T	C/T	0.0087329	LOC_Os07g22160	Chr7
SNP-7.12379205.	RG Control	12380199	6.97201	C	T	C/T	0.0087329	LOC_Os07g22170	Chr7
SNP-7.12379205.	RG Control	12380199	6.97201	C	T	C/T	0.0087329	LOC_Os07g22180	Chr7
SNP-7.12379205.	RG Control	12380199	6.97201	C	T	C/T	0.0087329	LOC_Os07g22190	Chr7
SNP-7.12379205.	RG Control	12380199	6.97201	C	T	C/T	0.0087329	LOC_Os07g22200	Chr7
SNP-7.12379205.	RG Control	12380199	6.97201	C	T	C/T	0.0087329	LOC_Os07g22210	Chr7
SNP-10.5742955.	RG Control	5726418	6.96916	G	C	G/C	0.00364219	LOC_Os10g10380	Chr10
SNP-10.5742955.	RG Control	5726418	6.96916	G	C	G/C	0.00364219	LOC_Os10g10390	Chr10
SNP-10.5742955.	RG Control	5726418	6.96916	G	C	G/C	0.00364219	LOC_Os10g10400	Chr10
SNP-10.5742955.	RG Control	5726418	6.96916	G	C	G/C	0.00364219	LOC_Os10g10410	Chr10
SNP-10.5742955.	RG Control	5726418	6.96916	G	C	G/C	0.00364219	LOC_Os10g10420	Chr10
SNP-10.5742955.	RG Control	5726418	6.96916	G	C	G/C	0.00364219	LOC_Os10g10434	Chr10
SNP-10.5742955.	RG Control	5726418	6.96916	G	C	G/C	0.00364219	LOC_Os10g10450	Chr10
SNP-10.5742955.	RG Control	5726418	6.96916	G	C	G/C	0.00364219	LOC_Os10g10460	Chr10
SNP-1.42077801.	RG Control	42078845	6.95653	A	G	A/G	0.000731451	LOC_Os01g72510	Chr1
SNP-1.42077801.	RG Control	42078845	6.95653	A	G	A/G	0.000731451	LOC_Os01g72520	Chr1
SNP-1.42077801.	RG Control	42078845	6.95653	A	G	A/G	0.000731451	LOC_Os01g72530	Chr1
SNP-1.42077801.	RG Control	42078845	6.95653	A	G	A/G	0.000731451	LOC_Os01g72540	Chr1
SNP-1.42077801.	RG Control	42078845	6.95653	A	G	A/G	0.000731451	LOC_Os01g72550	Chr1
SNP-1.42077801.	RG Control	42078845	6.95653	A	G	A/G	0.000731451	LOC_Os01g72560	Chr1
SNP-1.42077801.	RG Control	42078845	6.95653	A	G	A/G	0.000731451	LOC_Os01g72570	Chr1
SNP-1.42077801.	RG Control	42078845	6.95653	A	G	A/G	0.000731451	LOC_Os01g72570	Chr1
SNP-1.42077801.	RG Control	42078845	6.95653	A	G	A/G	0.000731451	LOC_Os01g72570	Chr1
SNP-8.6918780.	RG Control	6919776	6.94336	C	A	C/A	0.00785546	LOC_Os08g11780	Chr8
SNP-8.6918780.	RG Control	6919776	6.94336	C	A	C/A	0.00785546	LOC_Os08g11790	Chr8
SNP-8.6918780.	RG Control	6919776	6.94336	C	A	C/A	0.00785546	LOC_Os08g11800	Chr8
SNP-8.6918780.	RG Control	6919776	6.94336	C	A	C/A	0.00785546	LOC_Os08g11810	Chr8
SNP-8.6918780.	RG Control	6919776	6.94336	C	A	C/A	0.00785546	LOC_Os08g11820	Chr8
SNP-8.6918780.	RG Control	6919776	6.94336	C	A	C/A	0.00785546	LOC_Os08g11830	Chr8
SNP-4.21197815.	RG Control	21369763	6.93792	A	G	A/G	0.00473726	LOC_Os04g35130	Chr4
SNP-4.21197815.	RG Control	21369763	6.93792	A	G	A/G	0.00473726	LOC_Os04g35140	Chr4
SNP-4.21197815.	RG Control	21369763	6.93792	A	G	A/G	0.00473726	LOC_Os04g35160	Chr4
SNP-4.21197815.	RG Control	21369763	6.93792	A	G	A/G	0.00473726	LOC_Os04g35170	Chr4
SNP-4.21197815.	RG Control	21369763	6.93792	A	G	A/G	0.00473726	LOC_Os04g35180	Chr4
SNP-4.21197815.	RG Control	21369763	6.93792	A	G	A/G	0.00473726	LOC_Os04g35180	Chr4
SNP-4.21197815.	RG Control	21369763	6.93792	A	G	A/G	0.00473726	LOC_Os04g35190	Chr4
SNP-4.21197815.	RG Control	21369763	6.93792	A	G	A/G	0.00473726	LOC_Os04g35200	Chr4
SNP-4.21197815.	RG Control	21369763	6.93792	A	G	A/G	0.00473726	LOC_Os04g36640	Chr4
SNP-1.33625548.	RG Control	33626593	6.91578	T	A	T/A	0.00531912	LOC_Os01g58114	Chr1
SNP-1.33625548.	RG Control	33626593	6.91578	T	A	T/A	0.00531912	LOC_Os01g58114	Chr1
SNP-1.33625548.	RG Control	33626593	6.91578	T	A	T/A	0.00531912	LOC_Os01g58130	Chr1
SNP-1.33625548.	RG Control	33626593	6.91578	T	A	T/A	0.00531912	LOC_Os01g58140	Chr1
SNP-1.33625548.	RG Control	33626593	6.91578	T	A	T/A	0.00531912	LOC_Os01g58150	Chr1
SNP-1.33625548.	RG Control	33626593	6.91578	T	A	T/A	0.00531912	LOC_Os01g58160	Chr1
SNP-1.33625548.	RG Control	33626593	6.91578	T	A	T/A	0.00531912	LOC_Os01g58170	Chr1
SNP-1.33625548.	RG Control	33626593	6.91578	T	A	T/A	0.00531912	LOC_Os01g58194	Chr1
SNP-10.464664.	RG Control	465689	6.84609	A	G	A/G	0.00394358	LOC_Os10g01680	Chr10
SNP-10.464664.	RG Control	465689	6.84609	A	G	A/G	0.00394358	LOC_Os10g01690	Chr10
SNP-10.464664.	RG Control	465689	6.84609	A	G	A/G	0.00394358	LOC_Os10g01700	Chr10
SNP-10.464664.	RG Control	465689	6.84609	A	G	A/G	0.00394358	LOC_Os10g01710	Chr10
SNP-10.464664.	RG Control	465689	6.84609	A	G	A/G	0.00394358	LOC_Os10g01720	Chr10
SNP-10.464664.	RG Control	465689	6.84609	A	G	A/G	0.00394358	LOC_Os10g01730	Chr10
SNP-10.464664.	RG Control	465689	6.84609	A	G	A/G	0.00394358	LOC_Os10g01740	Chr10
SNP-10.464664.	RG Control	465689	6.84609	A	G	A/G	0.00394358	LOC_Os10g01750	Chr10
SNP-11.8570036.	RG Control	8575427	6.78144	G	A	G/A	0.00165137	LOC_Os11g15180	Chr11
SNP-11.8570036.	RG Control	8575427	6.78144	G	A	G/A	0.00165137	LOC_Os11g15190	Chr11
SNP-11.8570036.	RG Control	8575427	6.78144	G	A	G/A	0.00165137	LOC_Os11g15200	Chr11
SNP-11.8570036.	RG Control	8575427	6.78144	G	A	G/A	0.00165137	LOC_Os11g15210	Chr11
SNP-11.8570036.	RG Control	8575427	6.78144	G	A	G/A	0.00165137	LOC_Os11g15220	Chr11
SNP-3.25070033.	RG Control	25071953	6.68181	T	G	T/G	0.00311917	LOC_Os03g44510	Chr3
SNP-3.25070033.	RG Control	25071953	6.68181	T	G	T/G	0.00311917	LOC_Os03g44520	Chr3
SNP-3.25070033.	RG Control	25071953	6.68181	T	G	T/G	0.00311917	LOC_Os03g44530	Chr3
SNP-3.25070033.	RG Control	25071953	6.68181	T	G	T/G	0.00311917	LOC_Os03g44530	Chr3
SNP-3.25070033.	RG Control	25071953	6.68181	T	G	T/G	0.00311917	LOC_Os03g44540	Chr3
SNP-3.25070033.	RG Control	25071953	6.68181	T	G	T/G	0.00311917	LOC_Os03g44544	Chr3
SNP-3.25070033.	RG Control	25071953	6.68181	T	G	T/G	0.00311917	LOC_Os03g44550	Chr3
SNP-7.26085829.	RG Control	26086824	6.56143	T	C	T/C	0.00183903	LOC_Os07g43580	Chr7
SNP-7.26085829.	RG Control	26086824	6.56143	T	C	T/C	0.00183903	LOC_Os07g43600	Chr7
SNP-7.26085829.	RG Control	26086824	6.56143	T	C	T/C	0.00183903	LOC_Os07g43604	Chr7	Heat stress induced
SNP-7.26085829.	RG Control	26086824	6.56143	T	C	T/C	0.00183903	LOC_Os07g43610	Chr7
SNP-2.22261085.	RG Control	22266955	6.50579	G	T	G/T	0.00193573	LOC_Os02g36870	Chr2
SNP-2.22261085.	RG Control	22266955	6.50579	G	T	G/T	0.00193573	LOC_Os02g36880	Chr2
SNP-2.22261085.	RG Control	22266955	6.50579	G	T	G/T	0.00193573	LOC_Os02g36880	Chr2
SNP-2.22261085.	RG Control	22266955	6.50579	G	T	G/T	0.00193573	LOC_Os02g36880	Chr2
SNP-2.22261085.	RG Control	22266955	6.50579	G	T	G/T	0.00193573	LOC_Os02g36880	Chr2
SNP-2.22261085.	RG Control	22266955	6.50579	G	T	G/T	0.00193573	LOC_Os02g36890	Chr2
SNP-5.22423360.	RG HS	22485919	11.2671	G	A	G/A	0.0276381	LOC_Os05g38320	Chr5
SNP-5.22423360.	RG HS	22485919	11.2671	G	A	G/A	0.0276381	LOC_Os05g38330	Chr5
SNP-5.22423360.	RG HS	22485919	11.2671	G	A	G/A	0.0276381	LOC_Os05g38330	Chr5
SNP-5.22423360.	RG HS	22485919	11.2671	G	A	G/A	0.0276381	LOC_Os05g38340	Chr5
SNP-5.22423360.	RG HS	22485919	11.2671	G	A	G/A	0.0276381	LOC_Os05g38350	Chr5
SNP-5.22423360.	RG HS	22485919	11.2671	G	A	G/A	0.0276381	LOC_Os05g38360	Chr5
SNP-5.22423360.	RG HS	22485919	11.2671	G	A	G/A	0.0276381	LOC_Os05g38360	Chr5
SNP-5.22423360.	RG HS	22485919	11.2671	G	A	G/A	0.0276381	LOC_Os05g38360	Chr5
SNP-5.22423360.	RG HS	22485919	11.2671	G	A	G/A	0.0276381	LOC_Os05g38370	Chr5
SNP-5.22423360.	RG HS	22485919	11.2671	G	A	G/A	0.0276381	LOC_Os05g38370	Chr5
SNP-5.22423360.	RG HS	22485919	11.2671	G	A	G/A	0.0276381	LOC_Os05g38370	Chr5
SNP-5.22423360.	RG HS	22485919	11.2671	G	A	G/A	0.0276381	LOC_Os05g38380	Chr5
SNP-5.22423360.	RG HS	22485919	11.2671	G	A	G/A	0.0276381	LOC_Os05g38390	Chr5
SNP-5.22443176.	RG HS	22505735	10.3274	C	A	C/A	0.0255984	LOC_Os05g38360	Chr5
SNP-5.22443176.	RG HS	22505735	10.3274	C	A	C/A	0.0255984	LOC_Os05g38360	Chr5
SNP-5.22443176.	RG HS	22505735	10.3274	C	A	C/A	0.0255984	LOC_Os05g38360	Chr5
SNP-5.22443176.	RG HS	22505735	10.3274	C	A	C/A	0.0255984	LOC_Os05g38370	Chr5
SNP-5.22443176.	RG HS	22505735	10.3274	C	A	C/A	0.0255984	LOC_Os05g38370	Chr5
SNP-5.22443176.	RG HS	22505735	10.3274	C	A	C/A	0.0255984	LOC_Os05g38370	Chr5
SNP-5.22443176.	RG HS	22505735	10.3274	C	A	C/A	0.0255984	LOC_Os05g38380	Chr5
SNP-5.22443176.	RG HS	22505735	10.3274	C	A	C/A	0.0255984	LOC_Os05g38390	Chr5
SNP-5.22443176.	RG HS	22505735	10.3274	C	A	C/A	0.0255984	LOC_Os05g38400	Chr5
SNP-5.22443176.	RG HS	22505735	10.3274	C	A	C/A	0.0255984	LOC_Os05g38400	Chr5
SNP-5.22443176.	RG HS	22505735	10.3274	C	A	C/A	0.0255984	LOC_Os05g38400	Chr5
SNP-5.22385644.	RG HS	22448204	9.64978	T	C	T/C	0.0264057	LOC_Os05g38260	Chr5
SNP-5.22385644.	RG HS	22448204	9.64978	T	C	T/C	0.0264057	LOC_Os05g38264	Chr5
SNP-5.22385644.	RG HS	22448204	9.64978	T	C	T/C	0.0264057	LOC_Os05g38270	Chr5
SNP-5.22385644.	RG HS	22448204	9.64978	T	C	T/C	0.0264057	LOC_Os05g38270	Chr5
SNP-5.22385644.	RG HS	22448204	9.64978	T	C	T/C	0.0264057	LOC_Os05g38280	Chr5
SNP-5.22385644.	RG HS	22448204	9.64978	T	C	T/C	0.0264057	LOC_Os05g38290	Chr5
SNP-5.22385644.	RG HS	22448204	9.64978	T	C	T/C	0.0264057	LOC_Os05g38290	Chr5
SNP-5.22385644.	RG HS	22448204	9.64978	T	C	T/C	0.0264057	LOC_Os05g38300	Chr5
SNP-5.22385644.	RG HS	22448204	9.64978	T	C	T/C	0.0264057	LOC_Os05g38310	Chr5
SNP-5.22385644.	RG HS	22448204	9.64978	T	C	T/C	0.0264057	LOC_Os05g38320	Chr5
SNP-5.22385644.	RG HS	22448204	9.64978	T	C	T/C	0.0264057	LOC_Os05g38330	Chr5
SNP-5.22385644.	RG HS	22448204	9.64978	T	C	T/C	0.0264057	LOC_Os05g38330	Chr5
SNP-5.22138301.	RG HS	22200861	9.52708	G	A	G/A	0.0156402	LOC_Os05g37870	Chr5
SNP-5.22138301.	RG HS	22200861	9.52708	G	A	G/A	0.0156402	LOC_Os05g37880	Chr5
SNP-5.22138301.	RG HS	22200861	9.52708	G	A	G/A	0.0156402	LOC_Os05g37884	Chr5
SNP-5.22138301.	RG HS	22200861	9.52708	G	A	G/A	0.0156402	LOC_Os05g37890	Chr5
SNP-5.22138301.	RG HS	22200861	9.52708	G	A	G/A	0.0156402	LOC_Os05g37900	Chr5
SNP-5.22138301.	RG HS	22200861	9.52708	G	A	G/A	0.0156402	LOC_Os05g37910	Chr5
SNP-5.22138301.	RG HS	22200861	9.52708	G	A	G/A	0.0156402	LOC_Os05g37910	Chr5
SNP-11.17404960.	RG HS	17871105	9.47545	T	A	T/A	0.00818144	LOC_Os11g30660	Chr11
SNP-11.17404960.	RG HS	17871105	9.47545	T	A	T/A	0.00818144	LOC_Os11g30670	Chr11
SNP-11.17404960.	RG HS	17871105	9.47545	T	A	T/A	0.00818144	LOC_Os11g30690	Chr11
SNP-11.17404960.	RG HS	17871105	9.47545	T	A	T/A	0.00818144	LOC_Os11g30700	Chr11
SNP-11.17404960.	RG HS	17871105	9.47545	T	A	T/A	0.00818144	LOC_Os11g30720	Chr11
SNP-5.22178759.	RG HS	22241319	9.28745	C	T	C/T	0.0262646	LOC_Os05g37920	Chr5
SNP-5.22178759.	RG HS	22241319	9.28745	C	T	C/T	0.0262646	LOC_Os05g37930	Chr5
SNP-5.22178759.	RG HS	22241319	9.28745	C	T	C/T	0.0262646	LOC_Os05g37930	Chr5
SNP-5.22178759.	RG HS	22241319	9.28745	C	T	C/T	0.0262646	LOC_Os05g37930	Chr5
SNP-5.22178759.	RG HS	22241319	9.28745	C	T	C/T	0.0262646	LOC_Os05g37940	Chr5
SNP-1.42949271.	RG HS	42950316	8.60869	C	T	C/T	0.0101965	LOC_Os01g74130	Chr1
SNP-1.42949271.	RG HS	42950316	8.60869	C	T	C/T	0.0101965	LOC_Os01g74140	Chr1	Developing grain
SNP-1.42949271.	RG HS	42950316	8.60869	C	T	C/T	0.0101965	LOC_Os01g74146	Chr1	Heat stress induced
SNP-1.42949271.	RG HS	42950316	8.60869	C	T	C/T	0.0101965	LOC_Os01g74152	Chr1
SNP-1.42949271.	RG HS	42950316	8.60869	C	T	C/T	0.0101965	LOC_Os01g74160	Chr1
SNP-1.42949271.	RG HS	42950316	8.60869	C	T	C/T	0.0101965	LOC_Os01g74170	Chr1
SNP-5.22431567.	RG HS	22494126	8.49068	C	A	C/A	0.0250591	LOC_Os05g38340	Chr5
SNP-5.22431567.	RG HS	22494126	8.49068	C	A	C/A	0.0250591	LOC_Os05g38350	Chr5
SNP-5.22431567.	RG HS	22494126	8.49068	C	A	C/A	0.0250591	LOC_Os05g38360	Chr5
SNP-5.22431567.	RG HS	22494126	8.49068	C	A	C/A	0.0250591	LOC_Os05g38360	Chr5
SNP-5.22431567.	RG HS	22494126	8.49068	C	A	C/A	0.0250591	LOC_Os05g38360	Chr5
SNP-5.22431567.	RG HS	22494126	8.49068	C	A	C/A	0.0250591	LOC_Os05g38370	Chr5
SNP-5.22431567.	RG HS	22494126	8.49068	C	A	C/A	0.0250591	LOC_Os05g38370	Chr5
SNP-5.22431567.	RG HS	22494126	8.49068	C	A	C/A	0.0250591	LOC_Os05g38370	Chr5
SNP-5.22431567.	RG HS	22494126	8.49068	C	A	C/A	0.0250591	LOC_Os05g38380	Chr5
SNP-5.22431567.	RG HS	22494126	8.49068	C	A	C/A	0.0250591	LOC_Os05g38390	Chr5
SNP-7.19623366.	RG HS	19624360	8.3149	G	A	G/A	1.09503e-11	LOC_Os07g32774	Chr7
SNP-7.19623366.	RG HS	19624360	8.3149	G	A	G/A	1.09503e-11	LOC_Os07g32790	Chr7
SNP-7.19623366.	RG HS	19624360	8.3149	G	A	G/A	1.09503e-11	LOC_Os07g32800	Chr7
SNP-7.19623366.	RG HS	19624360	8.3149	G	A	G/A	1.09503e-11	LOC_Os07g32800	Chr7
SNP-7.19623366.	RG HS	19624360	8.3149	G	A	G/A	1.09503e-11	LOC_Os07g32810	Chr7
SNP-7.19623366.	RG HS	19624360	8.3149	G	A	G/A	1.09503e-11	LOC_Os07g32820	Chr7
SNP-7.19623366.	RG HS	19624360	8.3149	G	A	G/A	1.09503e-11	LOC_Os07g32830	Chr7
SNP-11.21577974.	RG HS	22044104	8.28579	C	A	C/A	0.00500544	LOC_Os11g37300	Chr11
SNP-11.21577974.	RG HS	22044104	8.28579	C	A	C/A	0.00500544	LOC_Os11g37310	Chr11
SNP-11.21577974.	RG HS	22044104	8.28579	C	A	C/A	0.00500544	LOC_Os11g37320	Chr11
SNP-11.21577974.	RG HS	22044104	8.28579	C	A	C/A	0.00500544	LOC_Os11g37330	Chr11	Heat stress induced
SNP-11.21577974.	RG HS	22044104	8.28579	C	A	C/A	0.00500544	LOC_Os11g37330	Chr11	Heat stress induced
SNP-11.21577974.	RG HS	22044104	8.28579	C	A	C/A	0.00500544	LOC_Os11g37340	Chr11
SNP-11.21577974.	RG HS	22044104	8.28579	C	A	C/A	0.00500544	LOC_Os11g37350	Chr11
SNP-11.21577974.	RG HS	22044104	8.28579	C	A	C/A	0.00500544	LOC_Os11g37360	Chr11
SNP-11.21577974.	RG HS	22044104	8.28579	C	A	C/A	0.00500544	LOC_Os11g37370	Chr11
SNP-11.21577974.	RG HS	22044104	8.28579	C	A	C/A	0.00500544	LOC_Os11g37380	Chr11
SNP-5.22441253.	RG HS	22503812	8.21969	A	T	A/T	0.023499	LOC_Os05g38350	Chr5
SNP-5.22441253.	RG HS	22503812	8.21969	A	T	A/T	0.023499	LOC_Os05g38360	Chr5
SNP-5.22441253.	RG HS	22503812	8.21969	A	T	A/T	0.023499	LOC_Os05g38360	Chr5
SNP-5.22441253.	RG HS	22503812	8.21969	A	T	A/T	0.023499	LOC_Os05g38360	Chr5
SNP-5.22441253.	RG HS	22503812	8.21969	A	T	A/T	0.023499	LOC_Os05g38370	Chr5
SNP-5.22441253.	RG HS	22503812	8.21969	A	T	A/T	0.023499	LOC_Os05g38370	Chr5
SNP-5.22441253.	RG HS	22503812	8.21969	A	T	A/T	0.023499	LOC_Os05g38370	Chr5
SNP-5.22441253.	RG HS	22503812	8.21969	A	T	A/T	0.023499	LOC_Os05g38380	Chr5
SNP-5.22441253.	RG HS	22503812	8.21969	A	T	A/T	0.023499	LOC_Os05g38390	Chr5
SNP-5.22441253.	RG HS	22503812	8.21969	A	T	A/T	0.023499	LOC_Os05g38400	Chr5
SNP-5.22441253.	RG HS	22503812	8.21969	A	T	A/T	0.023499	LOC_Os05g38400	Chr5
SNP-5.22441253.	RG HS	22503812	8.21969	A	T	A/T	0.023499	LOC_Os05g38400	Chr5
SNP-8.11503138.	RG HS	11504134	8.0022	T	C	T/C	0.00155013	LOC_Os08g19210	Chr8	Heat stress induced
SNP-8.11503138.	RG HS	11504134	8.0022	T	C	T/C	0.00155013	LOC_Os08g19210	Chr8	Heat stress induced
SNP-8.11503138.	RG HS	11504134	8.0022	T	C	T/C	0.00155013	LOC_Os08g19220	Chr8
SNP-8.11503138.	RG HS	11504134	8.0022	T	C	T/C	0.00155013	LOC_Os08g19230	Chr8
SNP-8.11503138.	RG HS	11504134	8.0022	T	C	T/C	0.00155013	LOC_Os08g19240	Chr8
SNP-8.11503138.	RG HS	11504134	8.0022	T	C	T/C	0.00155013	LOC_Os08g19250	Chr8
SNP-8.11503138.	RG HS	11504134	8.0022	T	C	T/C	0.00155013	LOC_Os08g19260	Chr8
SNP-5.23765889.	RG HS	23828469	7.78841	C	A	C/A	0.00903094	LOC_Os05g40580	Chr5
SNP-5.23765889.	RG HS	23828469	7.78841	C	A	C/A	0.00903094	LOC_Os05g40590	Chr5
SNP-5.23765889.	RG HS	23828469	7.78841	C	A	C/A	0.00903094	LOC_Os05g40600	Chr5
SNP-5.23765889.	RG HS	23828469	7.78841	C	A	C/A	0.00903094	LOC_Os05g40610	Chr5
SNP-5.23765889.	RG HS	23828469	7.78841	C	A	C/A	0.00903094	LOC_Os05g40620	Chr5
SNP-5.23765889.	RG HS	23828469	7.78841	C	A	C/A	0.00903094	LOC_Os05g40630	Chr5
SNP-5.23765889.	RG HS	23828469	7.78841	C	A	C/A	0.00903094	LOC_Os05g40640	Chr5
SNP-5.23765889.	RG HS	23828469	7.78841	C	A	C/A	0.00903094	LOC_Os05g40650	Chr5
SNP-5.23765889.	RG HS	23828469	7.78841	C	A	C/A	0.00903094	LOC_Os05g40660	Chr5
SNP-11.3829919.	RG HS	3834018	7.56341	A	T	A/T	0.013508	LOC_Os11g07510	Chr11
SNP-11.3829919.	RG HS	3834018	7.56341	A	T	A/T	0.013508	LOC_Os11g07530	Chr11
SNP-11.3829919.	RG HS	3834018	7.56341	A	T	A/T	0.013508	LOC_Os11g07540	Chr11
SNP-11.3829919.	RG HS	3834018	7.56341	A	T	A/T	0.013508	LOC_Os11g07550	Chr11
SNP-11.3829919.	RG HS	3834018	7.56341	A	T	A/T	0.013508	LOC_Os11g07560	Chr11
SNP-11.3829919.	RG HS	3834018	7.56341	A	T	A/T	0.013508	LOC_Os11g07570	Chr11
SNP-11.3829919.	RG HS	3834018	7.56341	A	T	A/T	0.013508	LOC_Os11g07580	Chr11
SNP-11.3829919.	RG HS	3834018	7.56341	A	T	A/T	0.013508	LOC_Os11g07590	Chr11
SNP-11.3829919.	RG HS	3834018	7.56341	A	T	A/T	0.013508	LOC_Os11g07600	Chr11
SNP-4.23303276.	RG HS	23488421	7.44929	G	A	G/A	0.000198428	LOC_Os04g39430	Chr4
SNP-4.23303276.	RG HS	23488421	7.44929	G	A	G/A	0.000198428	LOC_Os04g39430	Chr4
SNP-4.23303276.	RG HS	23488421	7.44929	G	A	G/A	0.000198428	LOC_Os04g39440	Chr4
SNP-4.23303276.	RG HS	23488421	7.44929	G	A	G/A	0.000198428	LOC_Os04g39440	Chr4
SNP-4.23303276.	RG HS	23488421	7.44929	G	A	G/A	0.000198428	LOC_Os04g39440	Chr4
SNP-4.23303276.	RG HS	23488421	7.44929	G	A	G/A	0.000198428	LOC_Os04g39440	Chr4
SNP-4.23303276.	RG HS	23488421	7.44929	G	A	G/A	0.000198428	LOC_Os04g39444	Chr4
SNP-4.23303276.	RG HS	23488421	7.44929	G	A	G/A	0.000198428	LOC_Os04g39450	Chr4
SNP-4.23303276.	RG HS	23488421	7.44929	G	A	G/A	0.000198428	LOC_Os04g39450	Chr4
SNP-4.23303276.	RG HS	23488421	7.44929	G	A	G/A	0.000198428	LOC_Os04g39460	Chr4
SNP-5.23791451.	RG HS	23854031	7.37654	C	T	C/T	0.00829531	LOC_Os05g40650	Chr5
SNP-5.23791451.	RG HS	23854031	7.37654	C	T	C/T	0.00829531	LOC_Os05g40660	Chr5
SNP-5.23791451.	RG HS	23854031	7.37654	C	T	C/T	0.00829531	LOC_Os05g40670	Chr5
SNP-5.23791451.	RG HS	23854031	7.37654	C	T	C/T	0.00829531	LOC_Os05g40680	Chr5
SNP-5.23791451.	RG HS	23854031	7.37654	C	T	C/T	0.00829531	LOC_Os05g40700	Chr5
SNP-5.23791451.	RG HS	23854031	7.37654	C	T	C/T	0.00829531	LOC_Os05g40710	Chr5
SNP-4.21197815.	RG HS	21369763	7.36347	A	G	A/G	0.00700198	LOC_Os04g35130	Chr4
SNP-4.21197815.	RG HS	21369763	7.36347	A	G	A/G	0.00700198	LOC_Os04g35140	Chr4
SNP-4.21197815.	RG HS	21369763	7.36347	A	G	A/G	0.00700198	LOC_Os04g35160	Chr4
SNP-4.21197815.	RG HS	21369763	7.36347	A	G	A/G	0.00700198	LOC_Os04g35170	Chr4
SNP-4.21197815.	RG HS	21369763	7.36347	A	G	A/G	0.00700198	LOC_Os04g35180	Chr4
SNP-4.21197815.	RG HS	21369763	7.36347	A	G	A/G	0.00700198	LOC_Os04g35180	Chr4
SNP-4.21197815.	RG HS	21369763	7.36347	A	G	A/G	0.00700198	LOC_Os04g35190	Chr4
SNP-4.21197815.	RG HS	21369763	7.36347	A	G	A/G	0.00700198	LOC_Os04g35200	Chr4
SNP-4.21197815.	RG HS	21369763	7.36347	A	G	A/G	0.00700198	LOC_Os04g36640	Chr4
SNP-5.23564097.	RG HS	23626677	7.34837	C	T	C/T	0.00768254	LOC_Os05g40200	Chr5
SNP-5.23564097.	RG HS	23626677	7.34837	C	T	C/T	0.00768254	LOC_Os05g40212	Chr5
SNP-5.23564097.	RG HS	23626677	7.34837	C	T	C/T	0.00768254	LOC_Os05g40220	Chr5
SNP-5.23564097.	RG HS	23626677	7.34837	C	T	C/T	0.00768254	LOC_Os05g40220	Chr5
SNP-5.23564097.	RG HS	23626677	7.34837	C	T	C/T	0.00768254	LOC_Os05g40230	Chr5
SNP-5.23564097.	RG HS	23626677	7.34837	C	T	C/T	0.00768254	LOC_Os05g40240	Chr5
SNP-5.23564097.	RG HS	23626677	7.34837	C	T	C/T	0.00768254	LOC_Os05g40250	Chr5
SNP-5.23564097.	RG HS	23626677	7.34837	C	T	C/T	0.00768254	LOC_Os05g40260	Chr5
SNP-5.23596862.	RG HS	23659442	7.34837	C	G	C/G	0.00768254	LOC_Os05g40250	Chr5
SNP-5.23596862.	RG HS	23659442	7.34837	C	G	C/G	0.00768254	LOC_Os05g40260	Chr5
SNP-5.23596862.	RG HS	23659442	7.34837	C	G	C/G	0.00768254	LOC_Os05g40270	Chr5
SNP-5.23596862.	RG HS	23659442	7.34837	C	G	C/G	0.00768254	LOC_Os05g40270	Chr5
SNP-5.23596862.	RG HS	23659442	7.34837	C	G	C/G	0.00768254	LOC_Os05g40270	Chr5
SNP-5.23596862.	RG HS	23659442	7.34837	C	G	C/G	0.00768254	LOC_Os05g40270	Chr5
SNP-5.23596862.	RG HS	23659442	7.34837	C	G	C/G	0.00768254	LOC_Os05g40270	Chr5
SNP-5.23596862.	RG HS	23659442	7.34837	C	G	C/G	0.00768254	LOC_Os05g40270	Chr5
SNP-5.23596862.	RG HS	23659442	7.34837	C	G	C/G	0.00768254	LOC_Os05g40270	Chr5
SNP-5.23596862.	RG HS	23659442	7.34837	C	G	C/G	0.00768254	LOC_Os05g40270	Chr5
SNP-5.23596862.	RG HS	23659442	7.34837	C	G	C/G	0.00768254	LOC_Os05g40270	Chr5
SNP-5.23596862.	RG HS	23659442	7.34837	C	G	C/G	0.00768254	LOC_Os05g40270	Chr5
SNP-5.23596862.	RG HS	23659442	7.34837	C	G	C/G	0.00768254	LOC_Os05g40270	Chr5
SNP-5.23596862.	RG HS	23659442	7.34837	C	G	C/G	0.00768254	LOC_Os05g40280	Chr5
SNP-5.23596862.	RG HS	23659442	7.34837	C	G	C/G	0.00768254	LOC_Os05g40285	Chr5
SNP-5.23596862.	RG HS	23659442	7.34837	C	G	C/G	0.00768254	LOC_Os05g40290	Chr5	Heat stress induced
SNP-5.23596862.	RG HS	23659442	7.34837	C	G	C/G	0.00768254	LOC_Os05g40290	Chr5	Heat stress induced
SNP-5.23596862.	RG HS	23659442	7.34837	C	G	C/G	0.00768254	LOC_Os05g40290	Chr5	Heat stress induced
SNP-5.23680433.	RG HS	23743013	7.34837	T	C	T/C	0.00768254	LOC_Os05g40370	Chr5
SNP-5.23680433.	RG HS	23743013	7.34837	T	C	T/C	0.00768254	LOC_Os05g40384	Chr5	Heat stress induced
SNP-5.23680433.	RG HS	23743013	7.34837	T	C	T/C	0.00768254	LOC_Os05g40400	Chr5
SNP-5.23680433.	RG HS	23743013	7.34837	T	C	T/C	0.00768254	LOC_Os05g40410	Chr5
SNP-5.23680433.	RG HS	23743013	7.34837	T	C	T/C	0.00768254	LOC_Os05g40420	Chr5
SNP-5.23680433.	RG HS	23743013	7.34837	T	C	T/C	0.00768254	LOC_Os05g40420	Chr5
SNP-5.23680433.	RG HS	23743013	7.34837	T	C	T/C	0.00768254	LOC_Os05g40420	Chr5
SNP-5.23680433.	RG HS	23743013	7.34837	T	C	T/C	0.00768254	LOC_Os05g40430	Chr5
SNP-5.23680433.	RG HS	23743013	7.34837	T	C	T/C	0.00768254	LOC_Os05g40440	Chr5
SNP-5.23680433.	RG HS	23743013	7.34837	T	C	T/C	0.00768254	LOC_Os05g40450	Chr5
SNP-5.23882246.	RG HS	23944826	7.34837	C	T	C/T	0.00768254	LOC_Os05g40800	Chr5
SNP-5.23882246.	RG HS	23944826	7.34837	C	T	C/T	0.00768254	LOC_Os05g40810	Chr5
SNP-5.23882246.	RG HS	23944826	7.34837	C	T	C/T	0.00768254	LOC_Os05g40820	Chr5
SNP-5.23882246.	RG HS	23944826	7.34837	C	T	C/T	0.00768254	LOC_Os05g40820	Chr5
SNP-5.23882246.	RG HS	23944826	7.34837	C	T	C/T	0.00768254	LOC_Os05g40820	Chr5
SNP-5.23882246.	RG HS	23944826	7.34837	C	T	C/T	0.00768254	LOC_Os05g40830	Chr5
SNP-5.23882246.	RG HS	23944826	7.34837	C	T	C/T	0.00768254	LOC_Os05g40840	Chr5
SNP-5.23882246.	RG HS	23944826	7.34837	C	T	C/T	0.00768254	LOC_Os05g40850	Chr5	Developing grain and Heat stress induced
SNP-5.23882246.	RG HS	23944826	7.34837	C	T	C/T	0.00768254	LOC_Os05g40860	Chr5
SNP-5.23976283.	RG HS	24038864	7.34837	C	T	C/T	0.00768254	LOC_Os05g40970	Chr5	Heat stress induced
SNP-5.23976283.	RG HS	24038864	7.34837	C	T	C/T	0.00768254	LOC_Os05g40980	Chr5
SNP-5.23976283.	RG HS	24038864	7.34837	C	T	C/T	0.00768254	LOC_Os05g40980	Chr5
SNP-5.23976283.	RG HS	24038864	7.34837	C	T	C/T	0.00768254	LOC_Os05g40990	Chr5
SNP-5.23976283.	RG HS	24038864	7.34837	C	T	C/T	0.00768254	LOC_Os05g41000	Chr5	Heat stress induced
SNP-5.23976283.	RG HS	24038864	7.34837	C	T	C/T	0.00768254	LOC_Os05g41010	Chr5
SNP-5.23976283.	RG HS	24038864	7.34837	C	T	C/T	0.00768254	LOC_Os05g41030	Chr5
SNP-5.23976283.	RG HS	24038864	7.34837	C	T	C/T	0.00768254	LOC_Os05g41040	Chr5
SNP-5.23976283.	RG HS	24038864	7.34837	C	T	C/T	0.00768254	LOC_Os05g41050	Chr5	Developing grain
SNP-5.23976283.	RG HS	24038864	7.34837	C	T	C/T	0.00768254	LOC_Os05g41060	Chr5
SNP-5.23994687.	RG HS	24057268	7.33891	A	G	A/G	0.00770726	LOC_Os05g41000	Chr5	Heat stress induced
SNP-5.23994687.	RG HS	24057268	7.33891	A	G	A/G	0.00770726	LOC_Os05g41010	Chr5
SNP-5.23994687.	RG HS	24057268	7.33891	A	G	A/G	0.00770726	LOC_Os05g41030	Chr5
SNP-5.23994687.	RG HS	24057268	7.33891	A	G	A/G	0.00770726	LOC_Os05g41040	Chr5
SNP-5.23994687.	RG HS	24057268	7.33891	A	G	A/G	0.00770726	LOC_Os05g41050	Chr5	Developing grain
SNP-5.23994687.	RG HS	24057268	7.33891	A	G	A/G	0.00770726	LOC_Os05g41060	Chr5
SNP-5.23994687.	RG HS	24057268	7.33891	A	G	A/G	0.00770726	LOC_Os05g41070	Chr5
SNP-5.23994687.	RG HS	24057268	7.33891	A	G	A/G	0.00770726	LOC_Os05g41080	Chr5	Heat stress induced
SNP-5.23994687.	RG HS	24057268	7.33891	A	G	A/G	0.00770726	LOC_Os05g41080	Chr5	Heat stress induced
SNP-5.23994687.	RG HS	24057268	7.33891	A	G	A/G	0.00770726	LOC_Os05g41090	Chr5
SNP-5.23994687.	RG HS	24057268	7.33891	A	G	A/G	0.00770726	LOC_Os05g41100	Chr5
SNP-5.23626855.	RG HS	23689435	7.32129	C	T	C/T	0.0076758	LOC_Os05g40285	Chr5
SNP-5.23626855.	RG HS	23689435	7.32129	C	T	C/T	0.0076758	LOC_Os05g40290	Chr5	Heat stress induced
SNP-5.23626855.	RG HS	23689435	7.32129	C	T	C/T	0.0076758	LOC_Os05g40290	Chr5	Heat stress induced
SNP-5.23626855.	RG HS	23689435	7.32129	C	T	C/T	0.0076758	LOC_Os05g40290	Chr5	Heat stress induced
SNP-5.23626855.	RG HS	23689435	7.32129	C	T	C/T	0.0076758	LOC_Os05g40300	Chr5
SNP-5.23626855.	RG HS	23689435	7.32129	C	T	C/T	0.0076758	LOC_Os05g40300	Chr5
SNP-5.23626855.	RG HS	23689435	7.32129	C	T	C/T	0.0076758	LOC_Os05g40310	Chr5
SNP-5.23626855.	RG HS	23689435	7.32129	C	T	C/T	0.0076758	LOC_Os05g40320	Chr5
SNP-5.23626855.	RG HS	23689435	7.32129	C	T	C/T	0.0076758	LOC_Os05g40330	Chr5
SNP-5.23626855.	RG HS	23689435	7.32129	C	T	C/T	0.0076758	LOC_Os05g40340	Chr5
SNP-5.23626855.	RG HS	23689435	7.32129	C	T	C/T	0.0076758	LOC_Os05g40350	Chr5
SNP-5.23765927.	RG HS	23828507	7.3143	A	G	A/G	0.00768177	LOC_Os05g40580	Chr5
SNP-5.23765927.	RG HS	23828507	7.3143	A	G	A/G	0.00768177	LOC_Os05g40590	Chr5
SNP-5.23765927.	RG HS	23828507	7.3143	A	G	A/G	0.00768177	LOC_Os05g40600	Chr5
SNP-5.23765927.	RG HS	23828507	7.3143	A	G	A/G	0.00768177	LOC_Os05g40610	Chr5
SNP-5.23765927.	RG HS	23828507	7.3143	A	G	A/G	0.00768177	LOC_Os05g40620	Chr5
SNP-5.23765927.	RG HS	23828507	7.3143	A	G	A/G	0.00768177	LOC_Os05g40630	Chr5
SNP-5.23765927.	RG HS	23828507	7.3143	A	G	A/G	0.00768177	LOC_Os05g40640	Chr5
SNP-5.23765927.	RG HS	23828507	7.3143	A	G	A/G	0.00768177	LOC_Os05g40650	Chr5
SNP-5.23765927.	RG HS	23828507	7.3143	A	G	A/G	0.00768177	LOC_Os05g40660	Chr5
SNP-11.14502081.	RG HS	14965768	7.25714	A	C	A/C	0.01376	LOC_Os11g26120	Chr11
SNP-11.14502081.	RG HS	14965768	7.25714	A	C	A/C	0.01376	LOC_Os11g26130	Chr11
SNP-11.14502081.	RG HS	14965768	7.25714	A	C	A/C	0.01376	LOC_Os11g26140	Chr11
SNP-11.14502081.	RG HS	14965768	7.25714	A	C	A/C	0.01376	LOC_Os11g26150	Chr11
SNP-11.14502081.	RG HS	14965768	7.25714	A	C	A/C	0.01376	LOC_Os11g26160	Chr11
SNP-1.32673060.	RG HS	32674105	7.24212	G	A	G/A	0.0121579	LOC_Os01g56600	Chr1
SNP-1.32673060.	RG HS	32674105	7.24212	G	A	G/A	0.0121579	LOC_Os01g56610	Chr1	Developing grain
SNP-1.32673060.	RG HS	32674105	7.24212	G	A	G/A	0.0121579	LOC_Os01g56620	Chr1
SNP-1.32673060.	RG HS	32674105	7.24212	G	A	G/A	0.0121579	LOC_Os01g56630	Chr1
SNP-1.32673060.	RG HS	32674105	7.24212	G	A	G/A	0.0121579	LOC_Os01g56630	Chr1
SNP-1.32673060.	RG HS	32674105	7.24212	G	A	G/A	0.0121579	LOC_Os01g56640	Chr1
SNP-1.32673060.	RG HS	32674105	7.24212	G	A	G/A	0.0121579	LOC_Os01g56640	Chr1
SNP-1.32673060.	RG HS	32674105	7.24212	G	A	G/A	0.0121579	LOC_Os01g56640	Chr1
SNP-1.32673060.	RG HS	32674105	7.24212	G	A	G/A	0.0121579	LOC_Os01g56650	Chr1
SNP-1.32673060.	RG HS	32674105	7.24212	G	A	G/A	0.0121579	LOC_Os01g56660	Chr1
SNP-5.23621583.	RG HS	23684163	7.23474	T	C	T/C	0.00767276	LOC_Os05g40280	Chr5
SNP-5.23621583.	RG HS	23684163	7.23474	T	C	T/C	0.00767276	LOC_Os05g40285	Chr5
SNP-5.23621583.	RG HS	23684163	7.23474	T	C	T/C	0.00767276	LOC_Os05g40290	Chr5	Heat stress induced
SNP-5.23621583.	RG HS	23684163	7.23474	T	C	T/C	0.00767276	LOC_Os05g40290	Chr5	Heat stress induced
SNP-5.23621583.	RG HS	23684163	7.23474	T	C	T/C	0.00767276	LOC_Os05g40290	Chr5	Heat stress induced
SNP-5.23621583.	RG HS	23684163	7.23474	T	C	T/C	0.00767276	LOC_Os05g40300	Chr5
SNP-5.23621583.	RG HS	23684163	7.23474	T	C	T/C	0.00767276	LOC_Os05g40300	Chr5
SNP-5.23621583.	RG HS	23684163	7.23474	T	C	T/C	0.00767276	LOC_Os05g40310	Chr5
SNP-5.23621583.	RG HS	23684163	7.23474	T	C	T/C	0.00767276	LOC_Os05g40320	Chr5
SNP-5.23621583.	RG HS	23684163	7.23474	T	C	T/C	0.00767276	LOC_Os05g40330	Chr5
SNP-5.23515750.	RG HS	23578330	7.11325	G	T	G/T	0.00699583	LOC_Os05g40100	Chr5
SNP-5.23515750.	RG HS	23578330	7.11325	G	T	G/T	0.00699583	LOC_Os05g40110	Chr5
SNP-5.23515750.	RG HS	23578330	7.11325	G	T	G/T	0.00699583	LOC_Os05g40120	Chr5
SNP-5.23515750.	RG HS	23578330	7.11325	G	T	G/T	0.00699583	LOC_Os05g40130	Chr5
SNP-5.23515750.	RG HS	23578330	7.11325	G	T	G/T	0.00699583	LOC_Os05g40140	Chr5
SNP-5.23515750.	RG HS	23578330	7.11325	G	T	G/T	0.00699583	LOC_Os05g40150	Chr5
SNP-5.23515750.	RG HS	23578330	7.11325	G	T	G/T	0.00699583	LOC_Os05g40160	Chr5
SNP-5.23515750.	RG HS	23578330	7.11325	G	T	G/T	0.00699583	LOC_Os05g40170	Chr5
SNP-5.23515750.	RG HS	23578330	7.11325	G	T	G/T	0.00699583	LOC_Os05g40180	Chr5	Heat stress induced
SNP-5.23631622.	RG HS	23694202	7.10838	T	G	T/G	0.00749726	LOC_Os05g40290	Chr5	Heat stress induced
SNP-5.23631622.	RG HS	23694202	7.10838	T	G	T/G	0.00749726	LOC_Os05g40290	Chr5	Heat stress induced
SNP-5.23631622.	RG HS	23694202	7.10838	T	G	T/G	0.00749726	LOC_Os05g40290	Chr5	Heat stress induced
SNP-5.23631622.	RG HS	23694202	7.10838	T	G	T/G	0.00749726	LOC_Os05g40300	Chr5
SNP-5.23631622.	RG HS	23694202	7.10838	T	G	T/G	0.00749726	LOC_Os05g40300	Chr5
SNP-5.23631622.	RG HS	23694202	7.10838	T	G	T/G	0.00749726	LOC_Os05g40310	Chr5
SNP-5.23631622.	RG HS	23694202	7.10838	T	G	T/G	0.00749726	LOC_Os05g40320	Chr5
SNP-5.23631622.	RG HS	23694202	7.10838	T	G	T/G	0.00749726	LOC_Os05g40330	Chr5
SNP-5.23631622.	RG HS	23694202	7.10838	T	G	T/G	0.00749726	LOC_Os05g40340	Chr5
SNP-5.23631622.	RG HS	23694202	7.10838	T	G	T/G	0.00749726	LOC_Os05g40350	Chr5
SNP-5.23631622.	RG HS	23694202	7.10838	T	G	T/G	0.00749726	LOC_Os05g40360	Chr5
SNP-5.22581810.	RG HS	22644368	7.09897	C	A	C/A	1.09503e-11	LOC_Os05g38560	Chr5
SNP-5.22581810.	RG HS	22644368	7.09897	C	A	C/A	1.09503e-11	LOC_Os05g38570	Chr5
SNP-5.22581810.	RG HS	22644368	7.09897	C	A	C/A	1.09503e-11	LOC_Os05g38580	Chr5
SNP-5.22581810.	RG HS	22644368	7.09897	C	A	C/A	1.09503e-11	LOC_Os05g38580	Chr5
SNP-5.22581810.	RG HS	22644368	7.09897	C	A	C/A	1.09503e-11	LOC_Os05g38590	Chr5
SNP-5.22581810.	RG HS	22644368	7.09897	C	A	C/A	1.09503e-11	LOC_Os05g38590	Chr5
SNP-5.22581810.	RG HS	22644368	7.09897	C	A	C/A	1.09503e-11	LOC_Os05g38590	Chr5
SNP-5.22581810.	RG HS	22644368	7.09897	C	A	C/A	1.09503e-11	LOC_Os05g38600	Chr5	Developing grain
SNP-5.22581810.	RG HS	22644368	7.09897	C	A	C/A	1.09503e-11	LOC_Os05g38610	Chr5
SNP-5.22581810.	RG HS	22644368	7.09897	C	A	C/A	1.09503e-11	LOC_Os05g38620	Chr5
SNP-5.22581810.	RG HS	22644368	7.09897	C	A	C/A	1.09503e-11	LOC_Os05g38630	Chr5
SNP-5.22581810.	RG HS	22644368	7.09897	C	A	C/A	1.09503e-11	LOC_Os05g38630	Chr5
SNP-5.22581810.	RG HS	22644368	7.09897	C	A	C/A	1.09503e-11	LOC_Os05g38640	Chr5
SNP-5.22581810.	RG HS	22644368	7.09897	C	A	C/A	1.09503e-11	LOC_Os05g38650	Chr5
SNP-5.22532075.	RG HS	22594633	7.09605	T	C	T/C	1.09502e-11	LOC_Os05g38480	Chr5	Heat stress induced
SNP-5.22532075.	RG HS	22594633	7.09605	T	C	T/C	1.09502e-11	LOC_Os05g38490	Chr5
SNP-5.22532075.	RG HS	22594633	7.09605	T	C	T/C	1.09502e-11	LOC_Os05g38500	Chr5
SNP-5.22532075.	RG HS	22594633	7.09605	T	C	T/C	1.09502e-11	LOC_Os05g38510	Chr5
SNP-5.22532075.	RG HS	22594633	7.09605	T	C	T/C	1.09502e-11	LOC_Os05g38520	Chr5
SNP-5.22532075.	RG HS	22594633	7.09605	T	C	T/C	1.09502e-11	LOC_Os05g38520	Chr5
SNP-5.22532075.	RG HS	22594633	7.09605	T	C	T/C	1.09502e-11	LOC_Os05g38520	Chr5
SNP-5.22532075.	RG HS	22594633	7.09605	T	C	T/C	1.09502e-11	LOC_Os05g38520	Chr5
SNP-5.22532075.	RG HS	22594633	7.09605	T	C	T/C	1.09502e-11	LOC_Os05g38530	Chr5	Developing grain and Heat stress induced
SNP-5.22532075.	RG HS	22594633	7.09605	T	C	T/C	1.09502e-11	LOC_Os05g38540	Chr5
SNP-5.23923652.	RG HS	23986233	7.07234	A	G	A/G	0.00748912	LOC_Os05g40870	Chr5
SNP-5.23923652.	RG HS	23986233	7.07234	A	G	A/G	0.00748912	LOC_Os05g40880	Chr5
SNP-5.23923652.	RG HS	23986233	7.07234	A	G	A/G	0.00748912	LOC_Os05g40890	Chr5	Heat stress induced
SNP-5.23923652.	RG HS	23986233	7.07234	A	G	A/G	0.00748912	LOC_Os05g40900	Chr5
SNP-5.23923652.	RG HS	23986233	7.07234	A	G	A/G	0.00748912	LOC_Os05g40900	Chr5
SNP-5.23923652.	RG HS	23986233	7.07234	A	G	A/G	0.00748912	LOC_Os05g40910	Chr5
SNP-5.23923652.	RG HS	23986233	7.07234	A	G	A/G	0.00748912	LOC_Os05g40920	Chr5
SNP-5.23548713.	RG HS	23611293	7.06632	G	A	G/A	0.00701642	LOC_Os05g40170	Chr5
SNP-5.23548713.	RG HS	23611293	7.06632	G	A	G/A	0.00701642	LOC_Os05g40180	Chr5	Heat stress induced
SNP-5.23548713.	RG HS	23611293	7.06632	G	A	G/A	0.00701642	LOC_Os05g40190	Chr5
SNP-5.23548713.	RG HS	23611293	7.06632	G	A	G/A	0.00701642	LOC_Os05g40200	Chr5
SNP-5.23548713.	RG HS	23611293	7.06632	G	A	G/A	0.00701642	LOC_Os05g40212	Chr5
SNP-5.23548713.	RG HS	23611293	7.06632	G	A	G/A	0.00701642	LOC_Os05g40220	Chr5
SNP-5.23548713.	RG HS	23611293	7.06632	G	A	G/A	0.00701642	LOC_Os05g40220	Chr5
SNP-5.23896968.	RG HS	23959548	7.02735	G	T	G/T	0.00753377	LOC_Os05g40820	Chr5
SNP-5.23896968.	RG HS	23959548	7.02735	G	T	G/T	0.00753377	LOC_Os05g40820	Chr5
SNP-5.23896968.	RG HS	23959548	7.02735	G	T	G/T	0.00753377	LOC_Os05g40820	Chr5
SNP-5.23896968.	RG HS	23959548	7.02735	G	T	G/T	0.00753377	LOC_Os05g40830	Chr5
SNP-5.23896968.	RG HS	23959548	7.02735	G	T	G/T	0.00753377	LOC_Os05g40840	Chr5
SNP-5.23896968.	RG HS	23959548	7.02735	G	T	G/T	0.00753377	LOC_Os05g40850	Chr5	Developing grain and Heat stress induced
SNP-5.23896968.	RG HS	23959548	7.02735	G	T	G/T	0.00753377	LOC_Os05g40860	Chr5
SNP-5.23896968.	RG HS	23959548	7.02735	G	T	G/T	0.00753377	LOC_Os05g40870	Chr5
SNP-5.23896968.	RG HS	23959548	7.02735	G	T	G/T	0.00753377	LOC_Os05g40880	Chr5
SNP-5.23896968.	RG HS	23959548	7.02735	G	T	G/T	0.00753377	LOC_Os05g40890	Chr5	Heat stress induced
SNP-5.23671939.	RG HS	23734519	7.00373	C	T	C/T	0.00778209	LOC_Os05g40370	Chr5
SNP-5.23671939.	RG HS	23734519	7.00373	C	T	C/T	0.00778209	LOC_Os05g40384	Chr5	Heat stress induced
SNP-5.23671939.	RG HS	23734519	7.00373	C	T	C/T	0.00778209	LOC_Os05g40400	Chr5
SNP-5.23671939.	RG HS	23734519	7.00373	C	T	C/T	0.00778209	LOC_Os05g40410	Chr5
SNP-5.23671939.	RG HS	23734519	7.00373	C	T	C/T	0.00778209	LOC_Os05g40420	Chr5
SNP-5.23671939.	RG HS	23734519	7.00373	C	T	C/T	0.00778209	LOC_Os05g40420	Chr5
SNP-5.23671939.	RG HS	23734519	7.00373	C	T	C/T	0.00778209	LOC_Os05g40420	Chr5
SNP-5.23846480.	RG HS	23909060	7.00353	G	A	G/A	0.00750069	LOC_Os05g40750	Chr5
SNP-5.23846480.	RG HS	23909060	7.00353	G	A	G/A	0.00750069	LOC_Os05g40760	Chr5
SNP-5.23846480.	RG HS	23909060	7.00353	G	A	G/A	0.00750069	LOC_Os05g40770	Chr5
SNP-5.23846480.	RG HS	23909060	7.00353	G	A	G/A	0.00750069	LOC_Os05g40770	Chr5
SNP-5.23846480.	RG HS	23909060	7.00353	G	A	G/A	0.00750069	LOC_Os05g40780	Chr5
SNP-5.23846480.	RG HS	23909060	7.00353	G	A	G/A	0.00750069	LOC_Os05g40790	Chr5	Developing grain and Heat stress induced
SNP-5.23846480.	RG HS	23909060	7.00353	G	A	G/A	0.00750069	LOC_Os05g40790	Chr5	Developing grain and Heat stress induced
SNP-5.23846480.	RG HS	23909060	7.00353	G	A	G/A	0.00750069	LOC_Os05g40800	Chr5
SNP-5.22971665.	RG HS	23034225	6.97081	G	A	G/A	0.00656566	LOC_Os05g39250	Chr5
SNP-5.22971665.	RG HS	23034225	6.97081	G	A	G/A	0.00656566	LOC_Os05g39260	Chr5
SNP-5.22971665.	RG HS	23034225	6.97081	G	A	G/A	0.00656566	LOC_Os05g39270	Chr5
SNP-5.22971665.	RG HS	23034225	6.97081	G	A	G/A	0.00656566	LOC_Os05g39280	Chr5
SNP-5.22971665.	RG HS	23034225	6.97081	G	A	G/A	0.00656566	LOC_Os05g39290	Chr5
SNP-5.22971665.	RG HS	23034225	6.97081	G	A	G/A	0.00656566	LOC_Os05g39300	Chr5
SNP-5.23691335.	RG HS	23753915	6.96357	G	T	G/T	0.0085137	LOC_Os05g40384	Chr5	Heat stress induced
SNP-5.23691335.	RG HS	23753915	6.96357	G	T	G/T	0.0085137	LOC_Os05g40400	Chr5
SNP-5.23691335.	RG HS	23753915	6.96357	G	T	G/T	0.0085137	LOC_Os05g40410	Chr5
SNP-5.23691335.	RG HS	23753915	6.96357	G	T	G/T	0.0085137	LOC_Os05g40420	Chr5
SNP-5.23691335.	RG HS	23753915	6.96357	G	T	G/T	0.0085137	LOC_Os05g40420	Chr5
SNP-5.23691335.	RG HS	23753915	6.96357	G	T	G/T	0.0085137	LOC_Os05g40420	Chr5
SNP-5.23691335.	RG HS	23753915	6.96357	G	T	G/T	0.0085137	LOC_Os05g40430	Chr5
SNP-5.23691335.	RG HS	23753915	6.96357	G	T	G/T	0.0085137	LOC_Os05g40440	Chr5
SNP-5.23691335.	RG HS	23753915	6.96357	G	T	G/T	0.0085137	LOC_Os05g40450	Chr5
SNP-5.23691335.	RG HS	23753915	6.96357	G	T	G/T	0.0085137	LOC_Os05g40460	Chr5
SNP-5.23691335.	RG HS	23753915	6.96357	G	T	G/T	0.0085137	LOC_Os05g40470	Chr5
SNP-5.23691335.	RG HS	23753915	6.96357	G	T	G/T	0.0085137	LOC_Os05g40480	Chr5
SNP-5.23599535.	RG HS	23662115	6.93436	T	C	T/C	0.00748226	LOC_Os05g40260	Chr5
SNP-5.23599535.	RG HS	23662115	6.93436	T	C	T/C	0.00748226	LOC_Os05g40270	Chr5
SNP-5.23599535.	RG HS	23662115	6.93436	T	C	T/C	0.00748226	LOC_Os05g40270	Chr5
SNP-5.23599535.	RG HS	23662115	6.93436	T	C	T/C	0.00748226	LOC_Os05g40270	Chr5
SNP-5.23599535.	RG HS	23662115	6.93436	T	C	T/C	0.00748226	LOC_Os05g40270	Chr5
SNP-5.23599535.	RG HS	23662115	6.93436	T	C	T/C	0.00748226	LOC_Os05g40270	Chr5
SNP-5.23599535.	RG HS	23662115	6.93436	T	C	T/C	0.00748226	LOC_Os05g40270	Chr5
SNP-5.23599535.	RG HS	23662115	6.93436	T	C	T/C	0.00748226	LOC_Os05g40270	Chr5
SNP-5.23599535.	RG HS	23662115	6.93436	T	C	T/C	0.00748226	LOC_Os05g40270	Chr5
SNP-5.23599535.	RG HS	23662115	6.93436	T	C	T/C	0.00748226	LOC_Os05g40270	Chr5
SNP-5.23599535.	RG HS	23662115	6.93436	T	C	T/C	0.00748226	LOC_Os05g40270	Chr5
SNP-5.23599535.	RG HS	23662115	6.93436	T	C	T/C	0.00748226	LOC_Os05g40270	Chr5
SNP-5.23599535.	RG HS	23662115	6.93436	T	C	T/C	0.00748226	LOC_Os05g40280	Chr5
SNP-5.23599535.	RG HS	23662115	6.93436	T	C	T/C	0.00748226	LOC_Os05g40285	Chr5
SNP-5.23599535.	RG HS	23662115	6.93436	T	C	T/C	0.00748226	LOC_Os05g40290	Chr5	Heat stress induced
SNP-5.23599535.	RG HS	23662115	6.93436	T	C	T/C	0.00748226	LOC_Os05g40290	Chr5	Heat stress induced
SNP-5.23599535.	RG HS	23662115	6.93436	T	C	T/C	0.00748226	LOC_Os05g40290	Chr5	Heat stress induced
SNP-1.32598269.	RG HS	32599314	6.89396	G	A	G/A	0.0120513	LOC_Os01g56510	Chr1
SNP-1.32598269.	RG HS	32599314	6.89396	G	A	G/A	0.0120513	LOC_Os01g56510	Chr1
SNP-1.32598269.	RG HS	32599314	6.89396	G	A	G/A	0.0120513	LOC_Os01g56510	Chr1
SNP-1.32598269.	RG HS	32599314	6.89396	G	A	G/A	0.0120513	LOC_Os01g56510	Chr1
SNP-1.32598269.	RG HS	32599314	6.89396	G	A	G/A	0.0120513	LOC_Os01g56510	Chr1
SNP-1.32598269.	RG HS	32599314	6.89396	G	A	G/A	0.0120513	LOC_Os01g56520	Chr1
SNP-1.32598269.	RG HS	32599314	6.89396	G	A	G/A	0.0120513	LOC_Os01g56520	Chr1
SNP-1.32598269.	RG HS	32599314	6.89396	G	A	G/A	0.0120513	LOC_Os01g56530	Chr1
SNP-1.32598269.	RG HS	32599314	6.89396	G	A	G/A	0.0120513	LOC_Os01g56540	Chr1
SNP-1.32598269.	RG HS	32599314	6.89396	G	A	G/A	0.0120513	LOC_Os01g56550	Chr1
SNP-1.32598269.	RG HS	32599314	6.89396	G	A	G/A	0.0120513	LOC_Os01g56550	Chr1
SNP-1.32598269.	RG HS	32599314	6.89396	G	A	G/A	0.0120513	LOC_Os01g56550	Chr1
SNP-1.32598269.	RG HS	32599314	6.89396	G	A	G/A	0.0120513	LOC_Os01g56560	Chr1
SNP-1.32598269.	RG HS	32599314	6.89396	G	A	G/A	0.0120513	LOC_Os01g56570	Chr1
SNP-1.32598269.	RG HS	32599314	6.89396	G	A	G/A	0.0120513	LOC_Os01g56580	Chr1
SNP-1.32598269.	RG HS	32599314	6.89396	G	A	G/A	0.0120513	LOC_Os01g56580	Chr1
SNP-1.32605451.	RG HS	32606496	6.87235	C	T	C/T	0.0120396	LOC_Os01g56520	Chr1
SNP-1.32605451.	RG HS	32606496	6.87235	C	T	C/T	0.0120396	LOC_Os01g56520	Chr1
SNP-1.32605451.	RG HS	32606496	6.87235	C	T	C/T	0.0120396	LOC_Os01g56530	Chr1
SNP-1.32605451.	RG HS	32606496	6.87235	C	T	C/T	0.0120396	LOC_Os01g56540	Chr1
SNP-1.32605451.	RG HS	32606496	6.87235	C	T	C/T	0.0120396	LOC_Os01g56550	Chr1
SNP-1.32605451.	RG HS	32606496	6.87235	C	T	C/T	0.0120396	LOC_Os01g56550	Chr1
SNP-1.32605451.	RG HS	32606496	6.87235	C	T	C/T	0.0120396	LOC_Os01g56550	Chr1
SNP-1.32605451.	RG HS	32606496	6.87235	C	T	C/T	0.0120396	LOC_Os01g56560	Chr1
SNP-1.32605451.	RG HS	32606496	6.87235	C	T	C/T	0.0120396	LOC_Os01g56570	Chr1
SNP-1.32605451.	RG HS	32606496	6.87235	C	T	C/T	0.0120396	LOC_Os01g56580	Chr1
SNP-1.32605451.	RG HS	32606496	6.87235	C	T	C/T	0.0120396	LOC_Os01g56580	Chr1
SNP-1.32605451.	RG HS	32606496	6.87235	C	T	C/T	0.0120396	LOC_Os01g56590	Chr1
SNP-5.23837692.	RG HS	23900272	6.85154	C	T	C/T	0.0073953	LOC_Os05g40730	Chr5
SNP-5.23837692.	RG HS	23900272	6.85154	C	T	C/T	0.0073953	LOC_Os05g40740	Chr5
SNP-5.23837692.	RG HS	23900272	6.85154	C	T	C/T	0.0073953	LOC_Os05g40740	Chr5
SNP-5.23837692.	RG HS	23900272	6.85154	C	T	C/T	0.0073953	LOC_Os05g40740	Chr5
SNP-5.23837692.	RG HS	23900272	6.85154	C	T	C/T	0.0073953	LOC_Os05g40740	Chr5
SNP-5.23837692.	RG HS	23900272	6.85154	C	T	C/T	0.0073953	LOC_Os05g40750	Chr5
SNP-5.23837692.	RG HS	23900272	6.85154	C	T	C/T	0.0073953	LOC_Os05g40760	Chr5
SNP-5.23837692.	RG HS	23900272	6.85154	C	T	C/T	0.0073953	LOC_Os05g40770	Chr5
SNP-5.23837692.	RG HS	23900272	6.85154	C	T	C/T	0.0073953	LOC_Os05g40770	Chr5
SNP-5.23837692.	RG HS	23900272	6.85154	C	T	C/T	0.0073953	LOC_Os05g40780	Chr5
SNP-5.23837692.	RG HS	23900272	6.85154	C	T	C/T	0.0073953	LOC_Os05g40790	Chr5	Developing grain and Heat stress induced
SNP-5.23837692.	RG HS	23900272	6.85154	C	T	C/T	0.0073953	LOC_Os05g40790	Chr5	Developing grain and Heat stress induced
SNP-1.32160021.	RG HS	32161066	6.85011	G	T	G/T	0.0146553	LOC_Os01g55795	Chr1
SNP-1.32160021.	RG HS	32161066	6.85011	G	T	G/T	0.0146553	LOC_Os01g55799	Chr1
SNP-1.32160021.	RG HS	32161066	6.85011	G	T	G/T	0.0146553	LOC_Os01g55799	Chr1
SNP-1.32160021.	RG HS	32161066	6.85011	G	T	G/T	0.0146553	LOC_Os01g55799	Chr1
SNP-1.32160021.	RG HS	32161066	6.85011	G	T	G/T	0.0146553	LOC_Os01g55820	Chr1
SNP-1.32160021.	RG HS	32161066	6.85011	G	T	G/T	0.0146553	LOC_Os01g55830	Chr1
SNP-1.32160021.	RG HS	32161066	6.85011	G	T	G/T	0.0146553	LOC_Os01g55840	Chr1
SNP-1.32160021.	RG HS	32161066	6.85011	G	T	G/T	0.0146553	LOC_Os01g55850	Chr1
SNP-1.32160021.	RG HS	32161066	6.85011	G	T	G/T	0.0146553	LOC_Os01g55860	Chr1
SNP-1.32160021.	RG HS	32161066	6.85011	G	T	G/T	0.0146553	LOC_Os01g55870	Chr1
SNP-1.32160021.	RG HS	32161066	6.85011	G	T	G/T	0.0146553	LOC_Os01g55880	Chr1
SNP-5.23940100.	RG HS	24002681	6.83381	A	G	A/G	6.9826e-05	LOC_Os05g40900	Chr5
SNP-5.23940100.	RG HS	24002681	6.83381	A	G	A/G	6.9826e-05	LOC_Os05g40900	Chr5
SNP-5.23940100.	RG HS	24002681	6.83381	A	G	A/G	6.9826e-05	LOC_Os05g40910	Chr5
SNP-5.23940100.	RG HS	24002681	6.83381	A	G	A/G	6.9826e-05	LOC_Os05g40920	Chr5
SNP-5.23940100.	RG HS	24002681	6.83381	A	G	A/G	6.9826e-05	LOC_Os05g40930	Chr5
SNP-5.23940100.	RG HS	24002681	6.83381	A	G	A/G	6.9826e-05	LOC_Os05g40940	Chr5
SNP-5.23940100.	RG HS	24002681	6.83381	A	G	A/G	6.9826e-05	LOC_Os05g40950	Chr5
SNP-5.23940100.	RG HS	24002681	6.83381	A	G	A/G	6.9826e-05	LOC_Os05g40960	Chr5
SNP-5.23940100.	RG HS	24002681	6.83381	A	G	A/G	6.9826e-05	LOC_Os05g40970	Chr5	Heat stress induced
SNP-5.24003015.	RG HS	24065596	6.83381	C	T	C/T	6.9826e-05	LOC_Os05g41030	Chr5
SNP-5.24003015.	RG HS	24065596	6.83381	C	T	C/T	6.9826e-05	LOC_Os05g41040	Chr5
SNP-5.24003015.	RG HS	24065596	6.83381	C	T	C/T	6.9826e-05	LOC_Os05g41050	Chr5	Developing grain
SNP-5.24003015.	RG HS	24065596	6.83381	C	T	C/T	6.9826e-05	LOC_Os05g41060	Chr5
SNP-5.24003015.	RG HS	24065596	6.83381	C	T	C/T	6.9826e-05	LOC_Os05g41070	Chr5
SNP-5.24003015.	RG HS	24065596	6.83381	C	T	C/T	6.9826e-05	LOC_Os05g41080	Chr5	Heat stress induced
SNP-5.24003015.	RG HS	24065596	6.83381	C	T	C/T	6.9826e-05	LOC_Os05g41080	Chr5	Heat stress induced
SNP-5.24003015.	RG HS	24065596	6.83381	C	T	C/T	6.9826e-05	LOC_Os05g41090	Chr5
SNP-5.24003015.	RG HS	24065596	6.83381	C	T	C/T	6.9826e-05	LOC_Os05g41100	Chr5
SNP-5.24003015.	RG HS	24065596	6.83381	C	T	C/T	6.9826e-05	LOC_Os05g41110	Chr5
SNP-5.24003015.	RG HS	24065596	6.83381	C	T	C/T	6.9826e-05	LOC_Os05g41110	Chr5
SNP-5.24003015.	RG HS	24065596	6.83381	C	T	C/T	6.9826e-05	LOC_Os05g41120	Chr5
SNP-5.24003015.	RG HS	24065596	6.83381	C	T	C/T	6.9826e-05	LOC_Os05g41120	Chr5
SNP-6.16078716.	RG HS	16079715	6.81022	T	C	T/C	1.09508e-11	LOC_Os06g28260	Chr6
SNP-6.16078716.	RG HS	16079715	6.81022	T	C	T/C	1.09508e-11	LOC_Os06g28270	Chr6
SNP-6.16078716.	RG HS	16079715	6.81022	T	C	T/C	1.09508e-11	LOC_Os06g28280	Chr6
SNP-6.16078716.	RG HS	16079715	6.81022	T	C	T/C	1.09508e-11	LOC_Os06g28290	Chr6
SNP-6.16078716.	RG HS	16079715	6.81022	T	C	T/C	1.09508e-11	LOC_Os06g28300	Chr6
SNP-6.16078716.	RG HS	16079715	6.81022	T	C	T/C	1.09508e-11	LOC_Os06g28310	Chr6
SNP-6.16078716.	RG HS	16079715	6.81022	T	C	T/C	1.09508e-11	LOC_Os06g28320	Chr6
SNP-6.16078716.	RG HS	16079715	6.81022	T	C	T/C	1.09508e-11	LOC_Os06g28330	Chr6
SNP-5.23010554.	RG HS	23073114	6.80714	G	A	G/A	0.00717352	LOC_Os05g39310	Chr5
SNP-5.23010554.	RG HS	23073114	6.80714	G	A	G/A	0.00717352	LOC_Os05g39320	Chr5
SNP-5.23010554.	RG HS	23073114	6.80714	G	A	G/A	0.00717352	LOC_Os05g39330	Chr5
SNP-5.23010554.	RG HS	23073114	6.80714	G	A	G/A	0.00717352	LOC_Os05g39340	Chr5
SNP-5.23010554.	RG HS	23073114	6.80714	G	A	G/A	0.00717352	LOC_Os05g39350	Chr5
SNP-5.23010554.	RG HS	23073114	6.80714	G	A	G/A	0.00717352	LOC_Os05g39360	Chr5
SNP-5.23010554.	RG HS	23073114	6.80714	G	A	G/A	0.00717352	LOC_Os05g39370	Chr5
SNP-6.16552421.	RG HS	16553420	6.77838	G	A	G/A	1.09505e-11	LOC_Os06g29010	Chr6
SNP-6.16552421.	RG HS	16553420	6.77838	G	A	G/A	1.09505e-11	LOC_Os06g29020	Chr6
SNP-6.16552421.	RG HS	16553420	6.77838	G	A	G/A	1.09505e-11	LOC_Os06g29020	Chr6
SNP-6.16552421.	RG HS	16553420	6.77838	G	A	G/A	1.09505e-11	LOC_Os06g29020	Chr6
SNP-6.16552421.	RG HS	16553420	6.77838	G	A	G/A	1.09505e-11	LOC_Os06g29030	Chr6
SNP-6.16552421.	RG HS	16553420	6.77838	G	A	G/A	1.09505e-11	LOC_Os06g29040	Chr6
SNP-6.16552421.	RG HS	16553420	6.77838	G	A	G/A	1.09505e-11	LOC_Os06g29050	Chr6
SNP-6.16552421.	RG HS	16553420	6.77838	G	A	G/A	1.09505e-11	LOC_Os06g29060	Chr6
SNP-5.24639398.	RG HS	24701979	6.77609	G	A	G/A	0.0161561	LOC_Os05g42210	Chr5
SNP-5.24639398.	RG HS	24701979	6.77609	G	A	G/A	0.0161561	LOC_Os05g42220	Chr5
SNP-5.24639398.	RG HS	24701979	6.77609	G	A	G/A	0.0161561	LOC_Os05g42230	Chr5
SNP-5.24639398.	RG HS	24701979	6.77609	G	A	G/A	0.0161561	LOC_Os05g42240	Chr5
SNP-5.24639398.	RG HS	24701979	6.77609	G	A	G/A	0.0161561	LOC_Os05g42250	Chr5
SNP-5.24639398.	RG HS	24701979	6.77609	G	A	G/A	0.0161561	LOC_Os05g42260	Chr5
SNP-1.32387623.	RG HS	32388668	6.77043	T	C	T/C	1.09501e-11	LOC_Os01g56200	Chr1
SNP-1.32387623.	RG HS	32388668	6.77043	T	C	T/C	1.09501e-11	LOC_Os01g56200	Chr1
SNP-1.32387623.	RG HS	32388668	6.77043	T	C	T/C	1.09501e-11	LOC_Os01g56210	Chr1
SNP-1.32387623.	RG HS	32388668	6.77043	T	C	T/C	1.09501e-11	LOC_Os01g56220	Chr1
SNP-1.32387623.	RG HS	32388668	6.77043	T	C	T/C	1.09501e-11	LOC_Os01g56230	Chr1
SNP-1.32387623.	RG HS	32388668	6.77043	T	C	T/C	1.09501e-11	LOC_Os01g56230	Chr1
SNP-1.32387623.	RG HS	32388668	6.77043	T	C	T/C	1.09501e-11	LOC_Os01g56230	Chr1
SNP-1.32387623.	RG HS	32388668	6.77043	T	C	T/C	1.09501e-11	LOC_Os01g56230	Chr1
SNP-1.32387623.	RG HS	32388668	6.77043	T	C	T/C	1.09501e-11	LOC_Os01g56230	Chr1
SNP-1.32387623.	RG HS	32388668	6.77043	T	C	T/C	1.09501e-11	LOC_Os01g56235	Chr1
SNP-1.32387623.	RG HS	32388668	6.77043	T	C	T/C	1.09501e-11	LOC_Os01g56240	Chr1
SNP-1.32387623.	RG HS	32388668	6.77043	T	C	T/C	1.09501e-11	LOC_Os01g56250	Chr1
SNP-1.32387623.	RG HS	32388668	6.77043	T	C	T/C	1.09501e-11	LOC_Os01g56260	Chr1
SNP-1.32387623.	RG HS	32388668	6.77043	T	C	T/C	1.09501e-11	LOC_Os01g56270	Chr1
SNP-1.32387623.	RG HS	32388668	6.77043	T	C	T/C	1.09501e-11	LOC_Os01g56270	Chr1
SNP-5.22370762.	RG HS	22433322	6.7613	G	T	G/T	0.0216419	LOC_Os05g38230	Chr5
SNP-5.22370762.	RG HS	22433322	6.7613	G	T	G/T	0.0216419	LOC_Os05g38240	Chr5
SNP-5.22370762.	RG HS	22433322	6.7613	G	T	G/T	0.0216419	LOC_Os05g38250	Chr5
SNP-5.22370762.	RG HS	22433322	6.7613	G	T	G/T	0.0216419	LOC_Os05g38260	Chr5
SNP-5.22370762.	RG HS	22433322	6.7613	G	T	G/T	0.0216419	LOC_Os05g38264	Chr5
SNP-5.22370762.	RG HS	22433322	6.7613	G	T	G/T	0.0216419	LOC_Os05g38270	Chr5
SNP-5.22370762.	RG HS	22433322	6.7613	G	T	G/T	0.0216419	LOC_Os05g38270	Chr5
SNP-5.22370762.	RG HS	22433322	6.7613	G	T	G/T	0.0216419	LOC_Os05g38280	Chr5
SNP-5.22370762.	RG HS	22433322	6.7613	G	T	G/T	0.0216419	LOC_Os05g38290	Chr5
SNP-5.22370762.	RG HS	22433322	6.7613	G	T	G/T	0.0216419	LOC_Os05g38290	Chr5
SNP-5.23631337.	RG HS	23693917	6.75259	C	T	C/T	0.00735674	LOC_Os05g40290	Chr5	Heat stress induced
SNP-5.23631337.	RG HS	23693917	6.75259	C	T	C/T	0.00735674	LOC_Os05g40290	Chr5	Heat stress induced
SNP-5.23631337.	RG HS	23693917	6.75259	C	T	C/T	0.00735674	LOC_Os05g40290	Chr5	Heat stress induced
SNP-5.23631337.	RG HS	23693917	6.75259	C	T	C/T	0.00735674	LOC_Os05g40300	Chr5
SNP-5.23631337.	RG HS	23693917	6.75259	C	T	C/T	0.00735674	LOC_Os05g40300	Chr5
SNP-5.23631337.	RG HS	23693917	6.75259	C	T	C/T	0.00735674	LOC_Os05g40310	Chr5
SNP-5.23631337.	RG HS	23693917	6.75259	C	T	C/T	0.00735674	LOC_Os05g40320	Chr5
SNP-5.23631337.	RG HS	23693917	6.75259	C	T	C/T	0.00735674	LOC_Os05g40330	Chr5
SNP-5.23631337.	RG HS	23693917	6.75259	C	T	C/T	0.00735674	LOC_Os05g40340	Chr5
SNP-5.23631337.	RG HS	23693917	6.75259	C	T	C/T	0.00735674	LOC_Os05g40350	Chr5
SNP-5.23631337.	RG HS	23693917	6.75259	C	T	C/T	0.00735674	LOC_Os05g40360	Chr5
SNP-5.22493515.	RG HS	22556074	6.75023	T	C	T/C	1.09501e-11	LOC_Os05g38420	Chr5
SNP-5.22493515.	RG HS	22556074	6.75023	T	C	T/C	1.09501e-11	LOC_Os05g38430	Chr5
SNP-5.22493515.	RG HS	22556074	6.75023	T	C	T/C	1.09501e-11	LOC_Os05g38440	Chr5
SNP-5.22493515.	RG HS	22556074	6.75023	T	C	T/C	1.09501e-11	LOC_Os05g38450	Chr5
SNP-5.22493515.	RG HS	22556074	6.75023	T	C	T/C	1.09501e-11	LOC_Os05g38460	Chr5
SNP-5.22493515.	RG HS	22556074	6.75023	T	C	T/C	1.09501e-11	LOC_Os05g38470	Chr5
SNP-5.22493515.	RG HS	22556074	6.75023	T	C	T/C	1.09501e-11	LOC_Os05g38470	Chr5
SNP-5.22493515.	RG HS	22556074	6.75023	T	C	T/C	1.09501e-11	LOC_Os05g38480	Chr5	Heat stress induced
SNP-12.17529146.	RG HS	17535192	6.73866	A	C	A/C	0.00838447	LOC_Os12g29480	Chr12
SNP-12.17529146.	RG HS	17535192	6.73866	A	C	A/C	0.00838447	LOC_Os12g29500	Chr12
SNP-12.17529146.	RG HS	17535192	6.73866	A	C	A/C	0.00838447	LOC_Os12g29510	Chr12
SNP-11.12787735.	RG HS	13251415	6.7055	C	T	C/T	0.00989453	LOC_Os11g23010	Chr11
SNP-11.12787735.	RG HS	13251415	6.7055	C	T	C/T	0.00989453	LOC_Os11g23020	Chr11
SNP-11.12787735.	RG HS	13251415	6.7055	C	T	C/T	0.00989453	LOC_Os11g23030	Chr11
SNP-11.12787735.	RG HS	13251415	6.7055	C	T	C/T	0.00989453	LOC_Os11g23040	Chr11
SNP-11.12787735.	RG HS	13251415	6.7055	C	T	C/T	0.00989453	LOC_Os11g23050	Chr11
SNP-11.12787735.	RG HS	13251415	6.7055	C	T	C/T	0.00989453	LOC_Os11g23060	Chr11
SNP-1.31894544.	RG HS	31895589	6.68475	G	A	G/A	0.0184007	LOC_Os01g55360	Chr1
SNP-1.31894544.	RG HS	31895589	6.68475	G	A	G/A	0.0184007	LOC_Os01g55360	Chr1
SNP-1.31894544.	RG HS	31895589	6.68475	G	A	G/A	0.0184007	LOC_Os01g55360	Chr1
SNP-1.31894544.	RG HS	31895589	6.68475	G	A	G/A	0.0184007	LOC_Os01g55360	Chr1
SNP-1.31894544.	RG HS	31895589	6.68475	G	A	G/A	0.0184007	LOC_Os01g55370	Chr1
SNP-1.31894544.	RG HS	31895589	6.68475	G	A	G/A	0.0184007	LOC_Os01g55380	Chr1
SNP-1.31894544.	RG HS	31895589	6.68475	G	A	G/A	0.0184007	LOC_Os01g55390	Chr1
SNP-5.22380344.	RG HS	22442904	6.67558	T	A	T/A	1.09502e-11	LOC_Os05g38250	Chr5
SNP-5.22380344.	RG HS	22442904	6.67558	T	A	T/A	1.09502e-11	LOC_Os05g38260	Chr5
SNP-5.22380344.	RG HS	22442904	6.67558	T	A	T/A	1.09502e-11	LOC_Os05g38264	Chr5
SNP-5.22380344.	RG HS	22442904	6.67558	T	A	T/A	1.09502e-11	LOC_Os05g38270	Chr5
SNP-5.22380344.	RG HS	22442904	6.67558	T	A	T/A	1.09502e-11	LOC_Os05g38270	Chr5
SNP-5.22380344.	RG HS	22442904	6.67558	T	A	T/A	1.09502e-11	LOC_Os05g38280	Chr5
SNP-5.22380344.	RG HS	22442904	6.67558	T	A	T/A	1.09502e-11	LOC_Os05g38290	Chr5
SNP-5.22380344.	RG HS	22442904	6.67558	T	A	T/A	1.09502e-11	LOC_Os05g38290	Chr5
SNP-5.22380344.	RG HS	22442904	6.67558	T	A	T/A	1.09502e-11	LOC_Os05g38300	Chr5
SNP-5.22380344.	RG HS	22442904	6.67558	T	A	T/A	1.09502e-11	LOC_Os05g38310	Chr5
SNP-5.22574046.	RG HS	22636604	6.67558	G	T	G/T	1.09502e-11	LOC_Os05g38550	Chr5
SNP-5.22574046.	RG HS	22636604	6.67558	G	T	G/T	1.09502e-11	LOC_Os05g38550	Chr5
SNP-5.22574046.	RG HS	22636604	6.67558	G	T	G/T	1.09502e-11	LOC_Os05g38560	Chr5
SNP-5.22574046.	RG HS	22636604	6.67558	G	T	G/T	1.09502e-11	LOC_Os05g38570	Chr5
SNP-5.22574046.	RG HS	22636604	6.67558	G	T	G/T	1.09502e-11	LOC_Os05g38580	Chr5
SNP-5.22574046.	RG HS	22636604	6.67558	G	T	G/T	1.09502e-11	LOC_Os05g38580	Chr5
SNP-5.22574046.	RG HS	22636604	6.67558	G	T	G/T	1.09502e-11	LOC_Os05g38590	Chr5
SNP-5.22574046.	RG HS	22636604	6.67558	G	T	G/T	1.09502e-11	LOC_Os05g38590	Chr5
SNP-5.22574046.	RG HS	22636604	6.67558	G	T	G/T	1.09502e-11	LOC_Os05g38590	Chr5
SNP-5.22574046.	RG HS	22636604	6.67558	G	T	G/T	1.09502e-11	LOC_Os05g38600	Chr5	Developing grain
SNP-5.22574046.	RG HS	22636604	6.67558	G	T	G/T	1.09502e-11	LOC_Os05g38610	Chr5
SNP-5.22574046.	RG HS	22636604	6.67558	G	T	G/T	1.09502e-11	LOC_Os05g38620	Chr5
SNP-5.22574046.	RG HS	22636604	6.67558	G	T	G/T	1.09502e-11	LOC_Os05g38630	Chr5
SNP-5.22574046.	RG HS	22636604	6.67558	G	T	G/T	1.09502e-11	LOC_Os05g38630	Chr5
SNP-5.22608778.	RG HS	22671337	6.67558	G	T	G/T	1.09502e-11	LOC_Os05g38630	Chr5
SNP-5.22608778.	RG HS	22671337	6.67558	G	T	G/T	1.09502e-11	LOC_Os05g38630	Chr5
SNP-5.22608778.	RG HS	22671337	6.67558	G	T	G/T	1.09502e-11	LOC_Os05g38640	Chr5
SNP-5.22608778.	RG HS	22671337	6.67558	G	T	G/T	1.09502e-11	LOC_Os05g38650	Chr5
SNP-5.22608778.	RG HS	22671337	6.67558	G	T	G/T	1.09502e-11	LOC_Os05g38660	Chr5
SNP-5.22608778.	RG HS	22671337	6.67558	G	T	G/T	1.09502e-11	LOC_Os05g38670	Chr5
SNP-5.22608778.	RG HS	22671337	6.67558	G	T	G/T	1.09502e-11	LOC_Os05g38680	Chr5
SNP-1.32426808.	RG HS	32427853	6.65252	G	A	G/A	1.09501e-11	LOC_Os01g56270	Chr1
SNP-1.32426808.	RG HS	32427853	6.65252	G	A	G/A	1.09501e-11	LOC_Os01g56270	Chr1
SNP-1.32426808.	RG HS	32427853	6.65252	G	A	G/A	1.09501e-11	LOC_Os01g56280	Chr1
SNP-1.32426808.	RG HS	32427853	6.65252	G	A	G/A	1.09501e-11	LOC_Os01g56290	Chr1
SNP-1.32426808.	RG HS	32427853	6.65252	G	A	G/A	1.09501e-11	LOC_Os01g56300	Chr1
SNP-1.32426808.	RG HS	32427853	6.65252	G	A	G/A	1.09501e-11	LOC_Os01g56310	Chr1
SNP-5.22621161.	RG HS	22683720	6.63865	G	A	G/A	1.0951e-11	LOC_Os05g38660	Chr5
SNP-5.22621161.	RG HS	22683720	6.63865	G	A	G/A	1.0951e-11	LOC_Os05g38670	Chr5
SNP-5.22621161.	RG HS	22683720	6.63865	G	A	G/A	1.0951e-11	LOC_Os05g38680	Chr5
SNP-5.22621161.	RG HS	22683720	6.63865	G	A	G/A	1.0951e-11	LOC_Os05g38690	Chr5
SNP-5.22621161.	RG HS	22683720	6.63865	G	A	G/A	1.0951e-11	LOC_Os05g38700	Chr5
SNP-5.22816096.	RG HS	22878655	6.63865	G	A	G/A	1.0951e-11	LOC_Os05g38980	Chr5	Developing grain
SNP-5.22816096.	RG HS	22878655	6.63865	G	A	G/A	1.0951e-11	LOC_Os05g38984	Chr5
SNP-5.22816096.	RG HS	22878655	6.63865	G	A	G/A	1.0951e-11	LOC_Os05g38990	Chr5
SNP-5.22816096.	RG HS	22878655	6.63865	G	A	G/A	1.0951e-11	LOC_Os05g39000	Chr5
SNP-5.22816096.	RG HS	22878655	6.63865	G	A	G/A	1.0951e-11	LOC_Os05g39010	Chr5
SNP-5.22816096.	RG HS	22878655	6.63865	G	A	G/A	1.0951e-11	LOC_Os05g39020	Chr5
SNP-5.22816096.	RG HS	22878655	6.63865	G	A	G/A	1.0951e-11	LOC_Os05g39030	Chr5
SNP-5.22816096.	RG HS	22878655	6.63865	G	A	G/A	1.0951e-11	LOC_Os05g39040	Chr5
SNP-5.22817677.	RG HS	22880236	6.63865	C	T	C/T	1.0951e-11	LOC_Os05g38980	Chr5	Developing grain
SNP-5.22817677.	RG HS	22880236	6.63865	C	T	C/T	1.0951e-11	LOC_Os05g38984	Chr5
SNP-5.22817677.	RG HS	22880236	6.63865	C	T	C/T	1.0951e-11	LOC_Os05g38990	Chr5
SNP-5.22817677.	RG HS	22880236	6.63865	C	T	C/T	1.0951e-11	LOC_Os05g39000	Chr5
SNP-5.22817677.	RG HS	22880236	6.63865	C	T	C/T	1.0951e-11	LOC_Os05g39010	Chr5
SNP-5.22817677.	RG HS	22880236	6.63865	C	T	C/T	1.0951e-11	LOC_Os05g39020	Chr5
SNP-5.22817677.	RG HS	22880236	6.63865	C	T	C/T	1.0951e-11	LOC_Os05g39030	Chr5
SNP-5.22817677.	RG HS	22880236	6.63865	C	T	C/T	1.0951e-11	LOC_Os05g39040	Chr5
SNP-5.22891830.	RG HS	22954390	6.63865	G	A	G/A	1.0951e-11	LOC_Os05g39110	Chr5
SNP-5.22891830.	RG HS	22954390	6.63865	G	A	G/A	1.0951e-11	LOC_Os05g39110	Chr5
SNP-5.22891830.	RG HS	22954390	6.63865	G	A	G/A	1.0951e-11	LOC_Os05g39120	Chr5
SNP-5.22891830.	RG HS	22954390	6.63865	G	A	G/A	1.0951e-11	LOC_Os05g39130	Chr5
SNP-5.22891830.	RG HS	22954390	6.63865	G	A	G/A	1.0951e-11	LOC_Os05g39140	Chr5	Heat stress induced
SNP-5.22891830.	RG HS	22954390	6.63865	G	A	G/A	1.0951e-11	LOC_Os05g39140	Chr5	Heat stress induced
SNP-5.22891830.	RG HS	22954390	6.63865	G	A	G/A	1.0951e-11	LOC_Os05g39150	Chr5
SNP-5.22891830.	RG HS	22954390	6.63865	G	A	G/A	1.0951e-11	LOC_Os05g39160	Chr5	Heat stress induced
SNP-5.22891830.	RG HS	22954390	6.63865	G	A	G/A	1.0951e-11	LOC_Os05g39160	Chr5	Heat stress induced
SNP-5.22891830.	RG HS	22954390	6.63865	G	A	G/A	1.0951e-11	LOC_Os05g39170	Chr5
SNP-5.22892584.	RG HS	22955144	6.63865	A	G	A/G	1.0951e-11	LOC_Os05g39110	Chr5
SNP-5.22892584.	RG HS	22955144	6.63865	A	G	A/G	1.0951e-11	LOC_Os05g39110	Chr5
SNP-5.22892584.	RG HS	22955144	6.63865	A	G	A/G	1.0951e-11	LOC_Os05g39120	Chr5
SNP-5.22892584.	RG HS	22955144	6.63865	A	G	A/G	1.0951e-11	LOC_Os05g39130	Chr5
SNP-5.22892584.	RG HS	22955144	6.63865	A	G	A/G	1.0951e-11	LOC_Os05g39140	Chr5	Heat stress induced
SNP-5.22892584.	RG HS	22955144	6.63865	A	G	A/G	1.0951e-11	LOC_Os05g39140	Chr5	Heat stress induced
SNP-5.22892584.	RG HS	22955144	6.63865	A	G	A/G	1.0951e-11	LOC_Os05g39150	Chr5
SNP-5.22892584.	RG HS	22955144	6.63865	A	G	A/G	1.0951e-11	LOC_Os05g39160	Chr5	Heat stress induced
SNP-5.22892584.	RG HS	22955144	6.63865	A	G	A/G	1.0951e-11	LOC_Os05g39160	Chr5	Heat stress induced
SNP-5.22892584.	RG HS	22955144	6.63865	A	G	A/G	1.0951e-11	LOC_Os05g39170	Chr5
SNP-5.22892584.	RG HS	22955144	6.63865	A	G	A/G	1.0951e-11	LOC_Os05g39180	Chr5
SNP-1.32749350.	RG HS	32750395	6.6024	G	A	G/A	0.0114763	LOC_Os01g56730	Chr1
SNP-1.32749350.	RG HS	32750395	6.6024	G	A	G/A	0.0114763	LOC_Os01g56740	Chr1
SNP-1.32749350.	RG HS	32750395	6.6024	G	A	G/A	0.0114763	LOC_Os01g56750	Chr1
SNP-1.32749350.	RG HS	32750395	6.6024	G	A	G/A	0.0114763	LOC_Os01g56764	Chr1
SNP-1.32749350.	RG HS	32750395	6.6024	G	A	G/A	0.0114763	LOC_Os01g56780	Chr1	Heat stress induced
SNP-1.32749350.	RG HS	32750395	6.6024	G	A	G/A	0.0114763	LOC_Os01g56780	Chr1	Heat stress induced
SNP-1.32749350.	RG HS	32750395	6.6024	G	A	G/A	0.0114763	LOC_Os01g56780	Chr1	Heat stress induced
SNP-1.32749350.	RG HS	32750395	6.6024	G	A	G/A	0.0114763	LOC_Os01g56790	Chr1
SNP-5.22954334.	RG HS	23016894	6.59733	C	T	C/T	0.00603981	LOC_Os05g39230	Chr5
SNP-5.22954334.	RG HS	23016894	6.59733	C	T	C/T	0.00603981	LOC_Os05g39230	Chr5
SNP-5.22954334.	RG HS	23016894	6.59733	C	T	C/T	0.00603981	LOC_Os05g39240	Chr5
SNP-5.22954334.	RG HS	23016894	6.59733	C	T	C/T	0.00603981	LOC_Os05g39250	Chr5
SNP-5.22954334.	RG HS	23016894	6.59733	C	T	C/T	0.00603981	LOC_Os05g39260	Chr5
SNP-5.22954334.	RG HS	23016894	6.59733	C	T	C/T	0.00603981	LOC_Os05g39270	Chr5
SNP-5.22954334.	RG HS	23016894	6.59733	C	T	C/T	0.00603981	LOC_Os05g39280	Chr5
SNP-5.23464101.	RG HS	23526681	6.58388	C	T	C/T	8.0354e-05	LOC_Os05g40010	Chr5
SNP-5.23464101.	RG HS	23526681	6.58388	C	T	C/T	8.0354e-05	LOC_Os05g40020	Chr5
SNP-5.23464101.	RG HS	23526681	6.58388	C	T	C/T	8.0354e-05	LOC_Os05g40030	Chr5
SNP-5.23464101.	RG HS	23526681	6.58388	C	T	C/T	8.0354e-05	LOC_Os05g40040	Chr5
SNP-5.23464101.	RG HS	23526681	6.58388	C	T	C/T	8.0354e-05	LOC_Os05g40050	Chr5
SNP-5.23464101.	RG HS	23526681	6.58388	C	T	C/T	8.0354e-05	LOC_Os05g40050	Chr5
SNP-5.23464101.	RG HS	23526681	6.58388	C	T	C/T	8.0354e-05	LOC_Os05g40060	Chr5
SNP-5.23464101.	RG HS	23526681	6.58388	C	T	C/T	8.0354e-05	LOC_Os05g40070	Chr5
SNP-7.12835047.	RG HS	12836041	6.57152	C	A	C/A	0.0067471	LOC_Os07g22720	Chr7
SNP-7.12835047.	RG HS	12836041	6.57152	C	A	C/A	0.0067471	LOC_Os07g22720	Chr7
SNP-7.12835047.	RG HS	12836041	6.57152	C	A	C/A	0.0067471	LOC_Os07g22730	Chr7
SNP-7.12835047.	RG HS	12836041	6.57152	C	A	C/A	0.0067471	LOC_Os07g22740	Chr7
SNP-7.12835047.	RG HS	12836041	6.57152	C	A	C/A	0.0067471	LOC_Os07g22750	Chr7
SNP-7.12835047.	RG HS	12836041	6.57152	C	A	C/A	0.0067471	LOC_Os07g22760	Chr7
SNP-7.12835047.	RG HS	12836041	6.57152	C	A	C/A	0.0067471	LOC_Os07g22770	Chr7
SNP-5.23913287.	RG HS	23975867	6.53997	G	A	G/A	0.00737058	LOC_Os05g40840	Chr5
SNP-5.23913287.	RG HS	23975867	6.53997	G	A	G/A	0.00737058	LOC_Os05g40850	Chr5	Developing grain and Heat stress induced
SNP-5.23913287.	RG HS	23975867	6.53997	G	A	G/A	0.00737058	LOC_Os05g40860	Chr5
SNP-5.23913287.	RG HS	23975867	6.53997	G	A	G/A	0.00737058	LOC_Os05g40870	Chr5
SNP-5.23913287.	RG HS	23975867	6.53997	G	A	G/A	0.00737058	LOC_Os05g40880	Chr5
SNP-5.23913287.	RG HS	23975867	6.53997	G	A	G/A	0.00737058	LOC_Os05g40890	Chr5	Heat stress induced
SNP-5.23913287.	RG HS	23975867	6.53997	G	A	G/A	0.00737058	LOC_Os05g40900	Chr5
SNP-5.23913287.	RG HS	23975867	6.53997	G	A	G/A	0.00737058	LOC_Os05g40900	Chr5
SNP-5.22646011.	RG HS	22708570	6.52649	T	A	T/A	1.09505e-11	LOC_Os05g38690	Chr5
SNP-5.22646011.	RG HS	22708570	6.52649	T	A	T/A	1.09505e-11	LOC_Os05g38700	Chr5
SNP-5.22646011.	RG HS	22708570	6.52649	T	A	T/A	1.09505e-11	LOC_Os05g38710	Chr5
SNP-5.22646011.	RG HS	22708570	6.52649	T	A	T/A	1.09505e-11	LOC_Os05g38710	Chr5
SNP-5.22646011.	RG HS	22708570	6.52649	T	A	T/A	1.09505e-11	LOC_Os05g38710	Chr5
SNP-5.22646011.	RG HS	22708570	6.52649	T	A	T/A	1.09505e-11	LOC_Os05g38720	Chr5
SNP-5.22646011.	RG HS	22708570	6.52649	T	A	T/A	1.09505e-11	LOC_Os05g38730	Chr5
SNP-5.22646011.	RG HS	22708570	6.52649	T	A	T/A	1.09505e-11	LOC_Os05g38730	Chr5
SNP-5.21630828.	RG HS	21693387	6.52021	A	G	A/G	1.95249e-06	LOC_Os05g37090	Chr5
SNP-5.21630828.	RG HS	21693387	6.52021	A	G	A/G	1.95249e-06	LOC_Os05g37100	Chr5
SNP-5.21630828.	RG HS	21693387	6.52021	A	G	A/G	1.95249e-06	LOC_Os05g37110	Chr5
SNP-5.21630828.	RG HS	21693387	6.52021	A	G	A/G	1.95249e-06	LOC_Os05g37120	Chr5
SNP-5.21630828.	RG HS	21693387	6.52021	A	G	A/G	1.95249e-06	LOC_Os05g37130	Chr5
SNP-5.21630828.	RG HS	21693387	6.52021	A	G	A/G	1.95249e-06	LOC_Os05g37130	Chr5
SNP-5.21630828.	RG HS	21693387	6.52021	A	G	A/G	1.95249e-06	LOC_Os05g37130	Chr5
SNP-5.21630828.	RG HS	21693387	6.52021	A	G	A/G	1.95249e-06	LOC_Os05g37130	Chr5
SNP-5.21630828.	RG HS	21693387	6.52021	A	G	A/G	1.95249e-06	LOC_Os05g37130	Chr5
SNP-5.21630828.	RG HS	21693387	6.52021	A	G	A/G	1.95249e-06	LOC_Os05g37140	Chr5
SNP-5.21630828.	RG HS	21693387	6.52021	A	G	A/G	1.95249e-06	LOC_Os05g37140	Chr5
SNP-5.21630828.	RG HS	21693387	6.52021	A	G	A/G	1.95249e-06	LOC_Os05g37150	Chr5
SNP-5.21630828.	RG HS	21693387	6.52021	A	G	A/G	1.95249e-06	LOC_Os05g37160	Chr5
SNP-5.24040516.	RG HS	24103097	6.51821	G	T	G/T	0.00552403	LOC_Os05g41120	Chr5
SNP-5.24040516.	RG HS	24103097	6.51821	G	T	G/T	0.00552403	LOC_Os05g41120	Chr5
SNP-5.24040516.	RG HS	24103097	6.51821	G	T	G/T	0.00552403	LOC_Os05g41130	Chr5
SNP-5.24040516.	RG HS	24103097	6.51821	G	T	G/T	0.00552403	LOC_Os05g41150	Chr5
SNP-5.24040516.	RG HS	24103097	6.51821	G	T	G/T	0.00552403	LOC_Os05g41160	Chr5
SNP-5.24040516.	RG HS	24103097	6.51821	G	T	G/T	0.00552403	LOC_Os05g41166	Chr5
SNP-5.24040516.	RG HS	24103097	6.51821	G	T	G/T	0.00552403	LOC_Os05g41172	Chr5
SNP-5.24040516.	RG HS	24103097	6.51821	G	T	G/T	0.00552403	LOC_Os05g41172	Chr5
SNP-5.24040516.	RG HS	24103097	6.51821	G	T	G/T	0.00552403	LOC_Os05g41180	Chr5
SNP-5.22438189.	RG HS	22500748	6.51708	C	T	C/T	0.020964	LOC_Os05g38350	Chr5
SNP-5.22438189.	RG HS	22500748	6.51708	C	T	C/T	0.020964	LOC_Os05g38360	Chr5
SNP-5.22438189.	RG HS	22500748	6.51708	C	T	C/T	0.020964	LOC_Os05g38360	Chr5
SNP-5.22438189.	RG HS	22500748	6.51708	C	T	C/T	0.020964	LOC_Os05g38360	Chr5
SNP-5.22438189.	RG HS	22500748	6.51708	C	T	C/T	0.020964	LOC_Os05g38370	Chr5
SNP-5.22438189.	RG HS	22500748	6.51708	C	T	C/T	0.020964	LOC_Os05g38370	Chr5
SNP-5.22438189.	RG HS	22500748	6.51708	C	T	C/T	0.020964	LOC_Os05g38370	Chr5
SNP-5.22438189.	RG HS	22500748	6.51708	C	T	C/T	0.020964	LOC_Os05g38380	Chr5
SNP-5.22438189.	RG HS	22500748	6.51708	C	T	C/T	0.020964	LOC_Os05g38390	Chr5
SNP-5.22438189.	RG HS	22500748	6.51708	C	T	C/T	0.020964	LOC_Os05g38400	Chr5
SNP-5.22438189.	RG HS	22500748	6.51708	C	T	C/T	0.020964	LOC_Os05g38400	Chr5
SNP-5.22438189.	RG HS	22500748	6.51708	C	T	C/T	0.020964	LOC_Os05g38400	Chr5
SNP-5.24260396.	RG HS	24322978	6.5077	G	A	G/A	0.0166114	LOC_Os05g41510	Chr5
SNP-5.24260396.	RG HS	24322978	6.5077	G	A	G/A	0.0166114	LOC_Os05g41520	Chr5
SNP-5.24260396.	RG HS	24322978	6.5077	G	A	G/A	0.0166114	LOC_Os05g41530	Chr5
SNP-5.24260396.	RG HS	24322978	6.5077	G	A	G/A	0.0166114	LOC_Os05g41540	Chr5
SNP-5.24260396.	RG HS	24322978	6.5077	G	A	G/A	0.0166114	LOC_Os05g41550	Chr5
SNP-5.24260396.	RG HS	24322978	6.5077	G	A	G/A	0.0166114	LOC_Os05g41550	Chr5
SNP-5.24260396.	RG HS	24322978	6.5077	G	A	G/A	0.0166114	LOC_Os05g41550	Chr5
SNP-5.24260396.	RG HS	24322978	6.5077	G	A	G/A	0.0166114	LOC_Os05g41560	Chr5
SNP-5.24260396.	RG HS	24322978	6.5077	G	A	G/A	0.0166114	LOC_Os05g41570	Chr5
