# Supplementary material for: Rice Chalky Grain 5 regulates natural variation for grain quality under heat stress
Source: Front Plant Sci. 2022 Oct 11;13:1026472. doi: 10.3389/fpls.2022.1026472 (PMC9593041; doi:10.3389/fpls.2022.1026472)
Supplement: Supplementary Table S6 — Percentage reduction (%) of various grain parameters in wild-type, knockout and overexpression lines under heat stress. [file Table_6.xlsx]

## Sheet: Sheet 1
Table S6. Percentage reduction (%) of various grain parameters in all genotypes under heat stress
Genotype	Grain length	Grain width	Grain area	Single grain weight	Total yield
OE#1	0.0728	0.009	0.0848	0.2377	30.06
OE#2	0.077	0.0058	0.0832	0.1957	42.4
KO#5	0.1739	0.0374	0.2078	0.4265	50
KO#6	0.109	0.033	0.1377	0.3994	36.1
Kit (WT)	0.0693	0.0008	0.0736	0.3147	33.16
