# Supplementary material for: Rice Chalky Grain 5 regulates natural variation for grain quality under heat stress
Source: Front Plant Sci. 2022 Oct 11;13:1026472. doi: 10.3389/fpls.2022.1026472 (PMC9593041; doi:10.3389/fpls.2022.1026472)
Supplement: Supplementary Table S7 — Genes positively and negatively co-regulated with OsCG5 identified from pairwise Pearson correlation analysis using the dataset from Chen et al., 2016. [file Table_7.xlsx]

## Sheet: Sheet1
Table S7. Positively and negatively co-regulated genes of OsCG5 identified from pairwise Pearson correlation analysis using the dataset from Chen et al., 2016
Locus	Pearson correlation coefficient	P-Value	Annotation
LOC_Os07g01460	0.968	2.53144e-07	expressed protein
LOC_Os12g44350	0.96	7.9786e-07	actin, putative, expressed
LOC_Os07g22640	0.951	2.01549e-06	lipid binding protein, putative, expressed
LOC_Os01g63270	0.948	2.62943e-06	alpha-glucan phosphorylast isozyme, putative, expressed
LOC_Os01g58730	0.947	2.87795e-06	glycosyl hydrolases family 17, putative, expressed
LOC_Os06g45320	0.945	3.69895e-06	DEFL27 - Defensin and Defensin-like DEFL family
LOC_Os06g15360	0.944	3.78664e-06	RAD23 DNA repair protein, putative, expressed
LOC_Os01g02880	0.943	4.22025e-06	fructose-bisphospate aldolase isozyme, putative, expressed
LOC_Os01g46350	0.942	4.66107e-06	proteins of unknown function domain containing protein, expressed
LOC_Os08g07490	0.942	4.8099e-06	expressed protein
LOC_Os01g01660	0.942	4.85402e-06	isoflavone reductase, putative, expressed
LOC_Os01g57700	0.941	4.99628e-06	membrane protein, putative, expressed
LOC_Os06g43620	0.94	5.48488e-06	haemolysin-III, putative, expressed
LOC_Os02g20130	0.94	5.49245e-06	DEFL72 - Defensin and Defensin-like DEFL family
LOC_Os02g44730	0.939	5.77026e-06	tetracycline transporter protein, putative, expressed
LOC_Os09g04730	0.938	6.56686e-06	dehydrogenase/reductase SDR family member 2, putative, expressed
LOC_Os02g38290	0.937	6.81942e-06	cytochrome P450, putative, expressed
LOC_Os08g01090	0.937	7.22107e-06	B3 DNA binding domain containing protein, expressed
LOC_Os01g45274	0.936	7.54055e-06	carbonic anhydrase, chloroplast precursor, putative, expressed
LOC_Os02g52450	0.935	8.16084e-06	regulator of ribonuclease, putative, expressed
LOC_Os02g46290	0.935	8.40037e-06	invertase/pectin methylesterase inhibitor family protein, putative, expressed
LOC_Os06g05430	0.935	8.46685e-06	expressed protein
LOC_Os08g42350	0.934	9.11856e-06	nodulin MtN3 family protein, putative, expressed
LOC_Os03g45344	0.932	9.91273e-06	expressed protein
LOC_Os01g21630	0.932	1.0399e-05	pectinacetylesterase domain containing protein, expressed
LOC_Os03g48060	0.931	1.06556e-05	class I glutamine amidotransferase, putative, expressed
LOC_Os05g01760	0.929	1.23207e-05	lysine ketoglutarate reductase trans-splicing related 1, putative, expressed
LOC_Os11g04010	0.928	1.37905e-05	ICE-like protease p20 domain containing protein, putative, expressed
LOC_Os08g03380	0.926	1.509e-05	heat shock protein DnaJ, putative, expressed
LOC_Os10g22330	0.925	1.62488e-05	clathrin adaptor complex small chain domain containing protein, expressed
LOC_Os01g66700	0.925	1.65192e-05	beta-hexosaminidase precursor, putative, expressed
LOC_Os11g06790	0.925	1.69216e-05	retrotransposon protein, putative, unclassified, expressed
LOC_Os03g62950	0.925	1.69921e-05	expressed protein
LOC_Os11g47330	0.924	1.70201e-05	ATP-grasp domain containing protein, expressed
LOC_Os10g37090	0.924	1.73687e-05	expressed protein
LOC_Os01g42150	0.924	1.77393e-05	MEGL13 - Maternally expressed gene MEG family protein precursor, expressed
LOC_Os01g13280	0.922	2.02092e-05	ubiquitin conjugating enzyme protein, putative, expressed
LOC_Os04g41460	0.922	2.02827e-05	transporter family protein, putative, expressed
LOC_Os06g19690	0.922	2.02899e-05	expressed protein
LOC_Os05g19670	0.922	2.04369e-05	Cupin domain containing protein, expressed
LOC_Os10g30580	0.921	2.15351e-05	cell division control protein 48 homolog E, putative, expressed
LOC_Os01g64970	0.92	2.19104e-05	CAMK_CAMK_like.11 - CAMK includes calcium/calmodulin depedent protein kinases, expressed
LOC_Os07g41360	0.92	2.28288e-05	alpha-1,4-glucan-protein synthase, putative, expressed
LOC_Os01g37960	0.92	2.28709e-05	hydrolase, putative, expressed
LOC_Os12g02370	0.92	2.31246e-05	chalcone--flavonone isomerase, putative, expressed
LOC_Os09g33670	0.919	2.39089e-05	zinc finger, C3HC4 type domain containing protein, expressed
LOC_Os08g06550	0.919	2.4245e-05	acyl CoA binding protein, putative, expressed
LOC_Os03g51930	0.919	2.4477e-05	expressed protein
LOC_Os03g12110	0.919	2.44935e-05	homocysteine S-methyltransferase protein, putative, expressed
LOC_Os04g15760	0.919	2.46085e-05	DEFL51 - Defensin and Defensin-like DEFL family, expressed
LOC_Os05g06700	0.918	2.56927e-05	expressed protein
LOC_Os12g37870	0.917	2.6766e-05	ATP-grasp domain containing protein, expressed
LOC_Os11g05940	0.917	2.7025e-05	expressed protein
LOC_Os12g33080	0.916	2.87004e-05	2-oxoglutarate/malate translocator, chloroplast precursor, putative, expressed
LOC_Os08g43580	0.916	2.93149e-05	acyl carrier protein, putative, expressed
LOC_Os08g24900	0.915	2.94848e-05	retrotransposon protein, putative, unclassified, expressed
LOC_Os10g39320	0.915	3.01042e-05	aspartic proteinase nepenthesin precursor, putative, expressed
LOC_Os08g04840	0.915	3.10569e-05	MYB family transcription factor, putative, expressed
LOC_Os03g55290	0.914	3.11681e-05	GASR3 - Gibberellin-regulated GASA/GAST/Snakin family protein precursor, expressed
LOC_Os05g49170	0.913	3.37154e-05	cold acclimation protein WCOR413, putative, expressed
LOC_Os02g55140	0.913	3.44443e-05	leucine aminopeptidase, chloroplast precursor, putative, expressed
LOC_Os06g43920	0.912	3.53324e-05	hypothetical protein
LOC_Os06g48660	0.911	3.7233e-05	DEFL21 - Defensin and Defensin-like DEFL family, expressed
LOC_Os02g17210	0.91	3.89741e-05	OsFBX43 - F-box domain containing protein, expressed
LOC_Os04g15740	0.91	3.90018e-05	DEFL50 - Defensin and Defensin-like DEFL family, expressed
LOC_Os05g13520	0.91	3.94429e-05	white-brown complex homolog protein 12, putative, expressed
LOC_Os04g02900	0.91	3.97853e-05	dehydrogenase E1 component domain containing protein, expressed
LOC_Os12g41880	0.91	4.05597e-05	nuclear transcription factor Y subunit, putative, expressed
LOC_Os12g18110	0.91	4.09503e-05	PQ loop repeat domain containing protein, expressed
LOC_Os02g09630	0.908	4.36978e-05	GA20292-PA, putative, expressed
LOC_Os02g53570	0.908	4.54312e-05	DEFL74 - Defensin and Defensin-like DEFL family, expressed
LOC_Os01g42010	0.907	4.57645e-05	expressed protein
LOC_Os08g30740	0.907	4.64974e-05	ABC transporter, ATP-binding protein, putative, expressed
LOC_Os03g64170	0.906	4.81041e-05	GDSL-like lipase/acylhydrolase, putative, expressed
LOC_Os01g34560	0.906	4.82007e-05	3-ketoacyl-CoA synthase, putative, expressed
LOC_Os12g31450	0.906	4.82255e-05	plastid division regulator MinE, putative, expressed
LOC_Os06g40150	0.906	4.83305e-05	AP2 domain containing protein, expressed
LOC_Os03g08570	0.906	4.90633e-05	amine oxidase, flavin-containing, domain containing protein, expressed
LOC_Os03g21960	0.906	4.91735e-05	aminotransferase, putative, expressed
LOC_Os02g33130	0.906	4.92243e-05	pectinesterase inhibitor domain containing protein, putative, expressed
LOC_Os01g07700	0.906	4.98879e-05	expressed protein
LOC_Os03g31210	0.906	4.98929e-05	UDP-glucose 6-dehydrogenase, putative, expressed
LOC_Os11g19480	0.906	5.04969e-05	receptor protein kinase-like protein At4g34220 precursor, putative, expressed
LOC_Os05g07280	0.905	5.13588e-05	expressed protein
LOC_Os02g07410	0.905	5.14213e-05	glycine cleavage system H protein, putative, expressed
LOC_Os11g06730	0.905	5.15804e-05	ECAGL2 - ECA1 gametogenesis related family protein precursor, expressed
LOC_Os12g41790	0.905	5.23223e-05	DEFL3 - Defensin and Defensin-like DEFL family, expressed
LOC_Os08g01310	0.905	5.26195e-05	phospholipase C, putative, expressed
LOC_Os03g28420	0.904	5.33231e-05	3-oxoacyl-synthase, putative, expressed
LOC_Os05g43440	0.904	5.36604e-05	single-stranded DNA-binding protein, putative, expressed
LOC_Os11g16400	0.904	5.46968e-05	expressed protein
LOC_Os08g10600	0.904	5.50936e-05	UTP--glucose-1-phosphate uridylyltransferase, putative, expressed
LOC_Os12g17900	0.904	5.55395e-05	armadillo/beta-catenin repeat family protein, putative, expressed
LOC_Os09g02440	0.903	5.67199e-05	DCL, chloroplast precursor, putative, expressed
LOC_Os12g36194	0.903	5.75729e-05	nucleoside diphosphate kinase, putative, expressed
LOC_Os07g38600	0.903	5.83077e-05	REX1 DNA Repair family protein, expressed
LOC_Os01g16400	0.903	5.87206e-05	NB-ARC domain containing protein, expressed
LOC_Os03g02710	0.902	5.97636e-05	hydroxymethylglutaryl-CoA synthase, putative, expressed
LOC_Os12g41780	0.902	6.02999e-05	glycosyl transferase family 17 protein, putative, expressed
LOC_Os03g63860	0.902	6.03185e-05	DANA2, putative, expressed
LOC_Os02g01920	0.902	6.09621e-05	GHMP kinases ATP-binding protein, putative, expressed
LOC_Os01g56310	0.902	6.14753e-05	radical SAM enzyme, putative, expressed
LOC_Os08g42010	0.902	6.14778e-05	nodulin, putative, expressed
LOC_Os07g01470	0.901	6.22316e-05	circumsporozoite protein precursor, putative, expressed
LOC_Os11g40080	0.901	6.24492e-05	lipin, N-terminal conserved region family protein, expressed
LOC_Os06g49770	0.901	6.29411e-05	LTPL86 - Protease inhibitor/seed storage/LTP family protein precursor, expressed
LOC_Os06g36030	0.901	6.30403e-05	SWIM zinc finger family protein, expressed
LOC_Os05g47650	0.901	6.34221e-05	B3 DNA binding domain containing protein, expressed
LOC_Os06g15420	0.901	6.41238e-05	asparagine synthetase, putative, expressed
LOC_Os05g11970	0.901	6.47428e-05	GDSL-like lipase/acylhydrolase, putative, expressed
LOC_Os06g43840	0.9	6.48948e-05	protein kinase domain containing protein, expressed
LOC_Os04g52460	0.9	6.51872e-05	retrotransposon protein, putative, unclassified, expressed
LOC_Os09g28600	0.9	6.54144e-05	expressed protein
LOC_Os09g12560	0.9	6.5953e-05	ferrochelatase-2, chloroplast precursor, putative, expressed
LOC_Os05g37140	0.9	6.65908e-05	2Fe-2S iron-sulfur cluster binding domain containing protein, expressed
LOC_Os09g38560	0.9	6.71424e-05	OsRCI2-11 - Hydrophobic protein OSR8, expressed
LOC_Os02g06670	0.9	6.74837e-05	retrotransposon protein, putative, unclassified, expressed
LOC_Os02g38300	0.899	6.80687e-05	SNF7 domain containing protein, putative, expressed
LOC_Os09g02790	0.899	6.9114e-05	zinc-binding protein, putative, expressed
LOC_Os02g07060	0.898	7.1504e-05	tubulin/FtsZ domain containing protein, putative, expressed
LOC_Os06g12810	0.898	7.33235e-05	proteins of unknown function domain containing protein, expressed
LOC_Os10g30600	0.898	7.36727e-05	tyrosine protein kinase domain containing protein, putative, expressed
LOC_Os03g55090	0.898	7.39472e-05	alpha-glucan phosphorylast isozyme, putative, expressed
LOC_Os04g51330	0.897	7.51108e-05	maltose excess protein 1-like, chloroplast precursor, putative, expressed
LOC_Os03g22700	0.897	7.6801e-05	cyclin-dependent kinase C-2, putative, expressed
LOC_Os03g57854	0.897	7.76875e-05	MBTB3 - Bric-a-Brac, Tramtrack, Broad Complex BTB domain with Meprin and TRAF Homology MATH domain, expressed
LOC_Os02g01500	0.897	7.805e-05	2-oxo acid dehydrogenases acyltransferase domain containing protein, expressed
LOC_Os04g30760	0.896	7.98109e-05	3-oxoacyl-reductase, chloroplast precursor, putative, expressed
LOC_Os02g09200	0.896	8.01811e-05	cytochrome P450 71D10, putative, expressed
LOC_Os09g25460	0.895	8.32475e-05	transferase family protein, putative, expressed
LOC_Os03g48310	0.895	8.44838e-05	plasma membrane ATPase, putative, expressed
LOC_Os01g09720	0.895	8.51031e-05	dof zinc finger domain containing protein, putative, expressed
LOC_Os01g43380	0.894	8.64399e-05	glycosyltransferase family protein 1, putative, expressed
LOC_Os02g52870	0.894	8.67609e-05	zinc finger, C3HC4 type domain containing protein, expressed
LOC_Os01g59150	0.894	8.68322e-05	tubulin/FtsZ domain containing protein, putative, expressed
LOC_Os03g19410	0.894	8.78495e-05	OsPOP7 - Putative Prolyl Oligopeptidase homologue, expressed
LOC_Os07g25590	0.894	8.81546e-05	decarboxylase, putative, expressed
LOC_Os06g09630	0.894	8.83881e-05	3-oxoacyl-synthase, putative, expressed
LOC_Os04g24600	0.894	8.88906e-05	cysteine proteinase 1 precursor, putative, expressed
LOC_Os08g32920	0.893	9.13401e-05	dynamin-2B, putative, expressed
LOC_Os11g06880	0.893	9.14278e-05	acyl-CoA synthetase, putative, expressed
LOC_Os08g42730	0.893	9.31417e-05	radical SAM enzyme, putative, expressed
LOC_Os08g16320	0.893	9.35334e-05	cytochrome P450 protein, putative, expressed
LOC_Os11g41130	0.893	9.40706e-05	vacuolar protein sorting-associated protein 26, putative, expressed
LOC_Os01g12190	0.893	9.40721e-05	expressed protein
LOC_Os06g13060	0.892	9.74046e-05	heat shock protein DnaJ, putative, expressed
LOC_Os03g11590	0.892	9.8179e-05	integral membrane protein, putative, expressed
LOC_Os03g08100	0.891	0.000100684	hydrolase, alpha/beta fold family protein, putative, expressed
LOC_Os07g20150	0.891	0.000101141	expressed protein
LOC_Os04g55220	0.891	0.000101583	C2 domain containing protein, expressed
LOC_Os09g10730	0.891	0.000101713	expressed protein
LOC_Os04g05500	0.891	0.000101773	MEGL8 - Maternally expressed gene MEG family protein precursor, expressed
LOC_Os02g57480	0.89	0.000103308	transferase family protein, putative, expressed
LOC_Os02g06390	0.89	0.000105808	expressed protein
LOC_Os04g51610	0.889	0.000108362	calcium-transporting ATPase, plasma membrane-type, putative, expressed
LOC_Os12g08170	0.889	0.000110301	2-oxo acid dehydrogenases acyltransferase domain containing protein, expressed
LOC_Os01g71280	0.889	0.000110813	glycerol-3-phosphate dehydrogenase, putative, expressed
LOC_Os01g61190	0.888	0.000115458	exo70 exocyst complex subunit, putative, expressed
LOC_Os11g32240	0.888	0.000115467	cytochrome P450 51, putative, expressed
LOC_Os06g03860	0.887	0.00011793	uncharacterized membrane protein, putative, expressed
LOC_Os05g07632	0.887	0.000118094	haloacid dehalogenase-like hydrolase family protein, putative, expressed
LOC_Os01g35050	0.887	0.000118264	early-responsive to dehydration protein-related, putative, expressed
LOC_Os04g58580	0.887	0.000120518	phosphomannomutase, putative, expressed
LOC_Os01g37980	0.887	0.000122053	vesicle transport v-SNARE protein, putative, expressed
LOC_Os01g01650	0.886	0.000122609	isoflavone reductase homolog IRL, putative, expressed
LOC_Os08g09460	0.886	0.000123464	OsFBX267 - F-box domain containing protein, expressed
LOC_Os06g28124	0.886	0.000123781	glycosyltransferase, putative, expressed
LOC_Os01g57030	0.886	0.000123893	expressed protein
LOC_Os05g51690	0.886	0.000124445	CCT motif family protein, expressed
LOC_Os05g27100	0.886	0.000124834	expressed protein
LOC_Os04g43210	0.886	0.000125251	transporter family protein, putative, expressed
LOC_Os12g21890	0.886	0.000125918	PTEN, putative, expressed
LOC_Os09g39380	0.886	0.000126563	monodehydroascorbate reductase, putative, expressed
LOC_Os09g36860	0.886	0.000126592	acyl carrier protein, putative, expressed
LOC_Os09g36970	0.885	0.000127859	expressed protein
LOC_Os08g08840	0.885	0.000129023	phosphate/phosphate translocator, putative, expressed
LOC_Os06g05080	0.885	0.000131245	cytochrome c oxidase subunit 5B, mitochondrial precursor, putative, expressed
LOC_Os10g36350	0.885	0.000132426	MSP domain containing protein, putative, expressed
LOC_Os09g07830	0.884	0.000133095	acetyl-CoA acetyltransferase, cytosolic, putative, expressed
LOC_Os10g42100	0.884	0.000133382	pyruvate kinase, putative, expressed
LOC_Os06g10810	0.884	0.000134569	phosphate carrier protein, mitochondrial precursor, putative, expressed
LOC_Os07g40930	0.884	0.0001346	WD repeat-containing protein 12, putative, expressed
LOC_Os07g07880	0.884	0.000136058	trp repressor/replication initiator, putative, expressed
LOC_Os03g12290	0.884	0.000136786	glutamine synthetase, catalytic domain containing protein, expressed
LOC_Os04g33460	0.884	0.000137856	1,4-alpha-glucan-branching enzyme 2, chloroplast precursor, putative, expressed
LOC_Os11g08265	0.883	0.00013867	expressed protein
LOC_Os11g16430	0.883	0.000139914	diphthamide biosynthesis protein, putative, expressed
LOC_Os05g40330	0.883	0.00014133	auxin efflux carrier component, putative, expressed
LOC_Os01g57370	0.883	0.000141479	cyclic nucleotide-gated ion channel 2, putative, expressed
LOC_Os06g40620	0.883	0.000141601	SNF7 domain containing protein, putative, expressed
LOC_Os03g16980	0.883	0.000142157	NAD dependent epimerase/dehydratase family domain containing protein, expressed
LOC_Os11g40490	0.883	0.000143766	MBTB63 - Bric-a-Brac, Tramtrack, Broad Complex BTB domain with Meprin and TRAF Homology MATH domain, expressed
LOC_Os11g01480	0.883	0.000143925	MYB family transcription factor, putative, expressed
LOC_Os07g20600	0.882	0.000144484	retrotransposon, putative, centromere-specific
LOC_Os11g09940	0.882	0.00014574	expressed protein
LOC_Os01g16900	0.882	0.000146197	dehydrogenase, putative, expressed
LOC_Os12g01100	0.882	0.000147858	expressed protein
LOC_Os06g45590	0.882	0.000147951	glyceraldehyde-3-phosphate dehydrogenase, putative, expressed
LOC_Os02g09290	0.882	0.000149314	cytochrome P450 71D10, putative, expressed
LOC_Os03g03640	0.881	0.000150515	expressed protein
LOC_Os06g44310	0.881	0.000151126	tetraspanin family protein, putative, expressed
LOC_Os04g56060	0.881	0.000152387	protein kinase domain containing protein, expressed
LOC_Os01g01360	0.881	0.000152875	peptide transporter PTR2, putative, expressed
LOC_Os08g12840	0.881	0.000153268	FabA-like domain containing protein, expressed
LOC_Os03g59280	0.881	0.000154696	plastocyanin-like domain containing protein, putative, expressed
LOC_Os07g01750	0.881	0.00015504	MATE efflux family protein, putative, expressed
LOC_Os02g33180	0.881	0.000155075	rar1, putative, expressed
LOC_Os10g39760	0.881	0.000155146	WD domain, G-beta repeat domain containing protein, expressed
LOC_Os10g21100	0.881	0.00015586	glycosyl hydrolase family 10 protein, putative, expressed
LOC_Os04g55650	0.88	0.000156533	oryzain alpha chain precursor, putative, expressed
LOC_Os09g04200	0.88	0.000158113	transposon protein, putative, CACTA, En/Spm sub-class
LOC_Os01g50110	0.88	0.000158542	MYB family transcription factor, putative, expressed
LOC_Os05g23260	0.88	0.000158735	OsSigP4 - Putative Type I Signal Peptidase homologue; employs a putative Ser/His catalytic dyad, expressed
LOC_Os06g30860	0.88	0.0001588	WRKY31, expressed
LOC_Os11g45295	0.88	0.000161631	retrotransposon protein, putative, unclassified, expressed
LOC_Os09g33720	0.88	0.000161834	protein transport protein Sec61, putative, expressed
LOC_Os01g42470	0.88	0.00016212	acetyltransferase, GNAT family, putative, expressed
LOC_Os04g49870	0.879	0.000163322	expressed protein
LOC_Os02g10510	0.879	0.000164147	Ubiquitin family domain containing protein, expressed
LOC_Os02g45070	0.879	0.000164149	PINHEAD, putative, expressed
LOC_Os02g54390	0.879	0.000164412	hypro1, putative, expressed
LOC_Os02g41590	0.879	0.000164715	kinase, pfkB family, putative, expressed
LOC_Os09g31350	0.879	0.000165179	expressed protein
LOC_Os04g53220	0.879	0.000165187	signal recognition particle 14 kDa protein, putative, expressed
LOC_Os08g23810	0.879	0.000166061	enoyl-acyl-carrier-protein reductase NADH, chloroplast precursor, expressed
LOC_Os05g38690	0.879	0.000166638	expressed protein
LOC_Os09g25580	0.879	0.000167594	monogalactosyldiacylglycerol synthase, putative, expressed
LOC_Os03g56900	0.879	0.000167966	reticulon domain containing protein, putative, expressed
LOC_Os07g42960	0.879	0.000169306	phospho-2-dehydro-3-deoxyheptonate aldolase, chloroplast precursor, putative, expressed
LOC_Os08g07480	0.878	0.000169509	DNA-directed RNA polymerase subunit, putative, expressed
LOC_Os09g32050	0.878	0.000170005	chaperone protein dnaJ 10, putative, expressed
LOC_Os03g09870	0.878	0.000170885	mitochondrial import inner membrane translocase subunit Tim17, putative, expressed
LOC_Os07g25710	0.878	0.000171812	myb-like DNA-binding domain containing protein, expressed
LOC_Os02g04700	0.878	0.000174165	tRNA synthetases class II domain containing protein, expressed
LOC_Os01g51380	0.878	0.000174381	ATP synthase, putative, expressed
LOC_Os05g38400	0.878	0.000175117	OsFtsH8 FtsH protease, homologue of AtFtsH3/10, expressed
LOC_Os04g55060	0.878	0.000175346	3-oxoacyl-synthase III, chloroplast precursor, putative, expressed
LOC_Os12g06770	0.878	0.000176089	hypothetical protein
LOC_Os08g25570	0.877	0.00017722	histone deacetylase, putative, expressed
LOC_Os04g38840	0.877	0.000177476	LTPL81 - Protease inhibitor/seed storage/LTP family protein precursor, expressed
LOC_Os04g52850	0.877	0.000178306	OTU-like cysteine protease family protein, putative, expressed
LOC_Os04g55280	0.877	0.000180175	expressed protein
LOC_Os03g21870	0.877	0.000180393	DUF623 domain containing protein, expressed
LOC_Os02g34860	0.877	0.000181943	Regulator of chromosome condensation domain containing protein, expressed
LOC_Os02g44520	0.877	0.000181994	OsSub19 - Putative Subtilisin homologue, expressed
LOC_Os03g17520	0.877	0.000182199	CDP-alcohol phosphatidyltransferase, putative, expressed
LOC_Os09g33810	0.877	0.000182675	ankyrin repeat domain containing protein, putative, expressed
LOC_Os01g08760	0.876	0.000185292	choline/ethanolamine kinase, putative, expressed
LOC_Os11g11620	0.876	0.000185552	ZmEBE-1 protein, putative, expressed
LOC_Os07g46190	0.876	0.000186383	pectinesterase, putative, expressed
LOC_Os07g07560	0.876	0.00018646	CK1_CaseinKinase_1a.6 - CK1 includes the casein kinase 1 kinases, expressed
LOC_Os01g05810	0.876	0.000187314	gamma-glutamyltranspeptidase 1 precursor, putative, expressed
LOC_Os01g71670	0.876	0.000187854	glycosyl hydrolases family 17, putative, expressed
LOC_Os05g05480	0.876	0.000188637	OsDegp6 - Putative Deg protease homologue, expressed
LOC_Os08g04920	0.876	0.000189025	OsDegp11 - Putative Deg protease homologue, expressed
LOC_Os07g32129	0.876	0.000189945	expressed protein
LOC_Os07g44410	0.876	0.000190126	WD40-like Beta Propeller Repeat family protein, expressed
LOC_Os02g50840	0.875	0.000191656	BAH domain containing protein, putative, expressed
LOC_Os06g49880	0.875	0.000191668	B-box zinc finger family protein, putative, expressed
LOC_Os05g23320	0.875	0.000192966	expressed protein
LOC_Os03g03130	0.875	0.00019369	ubiquitin-conjugating enzyme, putative, expressed
LOC_Os07g08340	0.875	0.0001945	pyruvate kinase, putative, expressed
LOC_Os01g40570	0.875	0.000194752	outer mitochondrial membrane porin, putative, expressed
LOC_Os08g01950	0.875	0.000195409	transferase family protein, putative, expressed
LOC_Os12g03100	0.875	0.000195531	exostosin family domain containing protein, expressed
LOC_Os05g31490	0.875	0.000195674	golgi transport complex protein-related, putative, expressed
LOC_Os01g51800	0.875	0.000197313	expressed protein
LOC_Os01g59790	0.875	0.000197336	ADP-ribosylation factor, putative, expressed
LOC_Os01g65380	0.874	0.000197906	patellin protein, putative, expressed
LOC_Os03g15950	0.874	0.000197971	enolase, putative, expressed
LOC_Os07g03200	0.874	0.000199258	phytosulfokines precursor, putative, expressed
LOC_Os05g46260	0.874	0.00019962	exostosin, putative, expressed
LOC_Os05g07030	0.874	0.000199854	arginyl-tRNA synthetase, putative, expressed
LOC_Os07g12730	0.874	0.000200227	DUF567 domain containing protein, putative, expressed
LOC_Os03g48170	0.874	0.00020183	5-AMP-activated protein kinase-related, putative, expressed
LOC_Os01g27990	0.874	0.000202872	NPL4, putative, expressed
LOC_Os01g09560	0.874	0.00020299	mitochondrial-processing peptidase subunit alpha, mitochondrial precursor, putative, expressed
LOC_Os01g19450	0.874	0.000203592	ATP-citrate synthase subunit 1, putative, expressed
LOC_Os11g06720	0.873	0.000206002	abscisic stress-ripening, putative, expressed
LOC_Os01g04260	0.873	0.000206097	fatty acid hydroxylase, putative, expressed
LOC_Os10g17280	0.873	0.000206452	ATP synthase gamma chain, putative, expressed
LOC_Os09g08420	0.873	0.000208342	AGC_PVPK_like_kin82y.15 - ACG kinases include homologs to PKA, PKG and PKC, expressed
LOC_Os11g26600	0.873	0.000208359	MEGL3 - Maternally expressed gene MEG family protein precursor, putative, expressed
LOC_Os04g32020	0.873	0.000210688	2-oxoglutarate dehydrogenase E1 component, mitochondrial precursor, putative, expressed
LOC_Os07g27490	0.873	0.000211637	Regulator of chromosome condensation domain containing protein, expressed
LOC_Os05g34670	0.873	0.000211808	KH domain containing protein, putative, expressed
LOC_Os10g37630	0.872	0.000213477	UBX domain-containing protein, putative, expressed
LOC_Os03g44420	0.872	0.000214456	tubulin/FtsZ domain containing protein, putative, expressed
LOC_Os09g12570	0.872	0.00021627	ubiquitin-conjugating enzyme, putative, expressed
LOC_Os08g01960	0.872	0.000218954	transferase family protein, putative, expressed
LOC_Os10g13670	0.872	0.000219279	Zinc finger, C3HC4 type domain containing protein, expressed
LOC_Os10g39220	0.872	0.000219625	tobamovirus multiplication protein, putative, expressed
LOC_Os03g25960	0.871	0.000221946	RNA recognition motif containing protein, putative, expressed
LOC_Os08g28900	0.871	0.000222694	OsRR8 type-A response regulator, expressed
LOC_Os03g55850	0.871	0.000222849	cold acclimation protein WCOR413, putative, expressed
LOC_Os09g19640	0.871	0.000223314	holocarboxylase synthetase, putative, expressed
LOC_Os03g43990	0.871	0.000223975	BTBN8 - Bric-a-Brac, Tramtrack, Broad Complex BTB domain with non-phototropic hypocotyl 3 NPH3 and coiled-coil domains, expressed
LOC_Os03g53900	0.871	0.000224175	universal stress protein domain containing protein, putative, expressed
LOC_Os07g15770	0.871	0.000224446	CCT motif family protein, expressed
LOC_Os04g34090	0.871	0.000227185	expressed protein
LOC_Os05g06350	0.871	0.000228373	importin subunit alpha, putative, expressed
LOC_Os07g37990	0.871	0.000228773	glycosyltransferase sugar-binding region containing DXD motif, putative, expressed
LOC_Os02g04170	0.871	0.000229124	L-aspartate oxidase 1, putative, expressed
LOC_Os10g40540	0.87	0.000230062	enoyl-CoA hydratase/isomerase family protein, putative, expressed
LOC_Os08g43060	0.87	0.000230303	expressed protein
LOC_Os01g62490	0.87	0.000231616	laccase precursor protein, putative, expressed
LOC_Os03g59250	0.87	0.000232019	expressed protein
LOC_Os01g43060	0.87	0.000232227	expressed protein
LOC_Os07g01310	0.87	0.000233323	glutamate receptor, putative, expressed
LOC_Os09g09360	0.87	0.000234168	esterase/lipase/thioesterase, putative, expressed
LOC_Os09g21520	0.87	0.00023428	DEAD-box ATP-dependent RNA helicase, putative, expressed
LOC_Os03g01910	0.87	0.000235042	transcription factor BTF3, putative, expressed
LOC_Os01g46070	0.87	0.000235474	lactate/malate dehydrogenase, putative, expressed
LOC_Os12g07740	0.87	0.000235658	eukaryotic translation initiation factor 2 subunit gamma, putative, expressed
LOC_Os02g58500	0.87	0.000237586	phospholipase A2, putative, expressed
LOC_Os03g18680	0.869	0.000238728	membrane associated DUF588 domain containing protein, putative, expressed
LOC_Os12g43550	0.869	0.000238829	ras-related protein, putative, expressed
LOC_Os02g52950	0.869	0.000238927	expressed protein
LOC_Os12g08280	0.869	0.00023931	inositol-1-monophosphatase, putative, expressed
LOC_Os11g32650	0.869	0.000241273	chalcone synthase, putative, expressed
LOC_Os01g32330	0.869	0.000241729	heavy metal-associated domain containing protein, expressed
LOC_Os08g13130	0.869	0.000241977	expressed protein
LOC_Os10g37480	0.869	0.000243063	STE_PAK_Ste20_STLK.6 - STE kinases include homologs to sterile 7, sterile 11 and sterile 20 from yeast, expressed
LOC_Os05g02640	0.869	0.000243339	hydrolase, NUDIX family, domain containing protein, expressed
LOC_Os02g16540	0.869	0.000244891	WRKY39, expressed
LOC_Os02g46700	0.869	0.00024513	GCN5-related N-acetyltransferase, putative, expressed
LOC_Os02g44106	0.868	0.00024783	expansin precursor, putative, expressed
LOC_Os07g49230	0.868	0.000248533	ubiquitin-activating enzyme, putative, expressed
LOC_Os02g04670	0.868	0.000248631	glucan endo-1,3-beta-glucosidase precursor, putative, expressed
LOC_Os02g18850	0.868	0.000249402	OsPOP5 - Putative Prolyl Oligopeptidase homologue, expressed
LOC_Os08g44430	0.868	0.000249539	vesicle-associated membrane protein 727, putative, expressed
LOC_Os09g35710	0.868	0.000255309	UBX domain-containing protein, putative, expressed
LOC_Os04g33060	0.867	0.000258499	NAD dependent epimerase/dehydratase family protein, putative, expressed
LOC_Os06g05790	0.867	0.000259788	transferase family domain containing protein, expressed
LOC_Os04g35270	0.867	0.000260903	alpha-1,4-fucosyltransferase, putative, expressed
LOC_Os09g15650	0.867	0.000261719	expressed protein
LOC_Os04g58470	0.867	0.000263003	choline transporter-related, putative, expressed
LOC_Os04g42980	0.867	0.000263151	zinc finger family protein, putative, expressed
LOC_Os07g22910	0.867	0.000264355	expressed protein
LOC_Os01g12650	0.866	0.000266503	reticulon domain containing protein, putative, expressed
LOC_Os03g55110	0.866	0.000267259	26S proteasome non-ATPase regulatory subunit 10, putative, expressed
LOC_Os05g19040	0.866	0.000268192	prefoldin, putative, expressed
LOC_Os12g29370	0.866	0.00026959	ZmEBE-1 protein, putative, expressed
LOC_Os07g42150	0.866	0.000270025	transcription initiation factor IID, putative, expressed
LOC_Os05g03040	0.866	0.000272096	AP2 domain containing protein, expressed
LOC_Os12g37939	0.866	0.000273208	unc-93 homolog A, putative, expressed
LOC_Os02g10190	0.866	0.000273223	DUF1680 domain containing protein, putative, expressed
LOC_Os03g18590	0.865	0.000276401	malonyl CoA-acyl carrier protein transacylase, mitochondrial precursor, putative, expressed
LOC_Os01g01307	0.865	0.000277329	translocon-associated protein beta domain containing protein, expressed
LOC_Os06g41110	0.865	0.00027795	tubulin binding cofactor C, putative, expressed
LOC_Os08g15070	0.865	0.000278512	GDU1, putative, expressed
LOC_Os02g46680	0.865	0.00027867	multidrug resistance protein, putative, expressed
LOC_Os02g38040	0.865	0.000279766	leucine-rich repeat family protein, putative, expressed
LOC_Os07g38990	0.865	0.000280666	expressed protein
LOC_Os03g52470	0.865	0.000281256	WD domain, G-beta repeat domain containing protein, expressed
LOC_Os01g51120	0.865	0.000281661	vesicle transport v-SNARE protein, putative, expressed
LOC_Os03g02180	0.865	0.000282954	cytochrome P450, putative, expressed
LOC_Os01g66560	0.864	0.000286316	signal recognition particle 72 kDa protein, putative, expressed
LOC_Os05g48050	0.864	0.000288199	ribosomal protein L7/L12 C-terminal domain containing protein, expressed
LOC_Os03g10510	0.864	0.000288447	outer mitochondrial membrane porin, putative, expressed
LOC_Os03g08450	0.864	0.000289102	eukaryotic translation initiation factor 3 subunit K, putative, expressed
LOC_Os10g30210	0.864	0.000290359	expressed protein
LOC_Os08g32170	0.864	0.000291393	oxidoreductase, 2OG-FeII oxygenase domain containing protein, putative, expressed
LOC_Os07g45350	0.864	0.000292881	zinc finger, RING-type, putative, expressed
LOC_Os03g25440	0.864	0.000293011	expressed protein
LOC_Os05g01480	0.864	0.000293096	ras-related protein, putative, expressed
LOC_Os03g57120	0.864	0.000294093	ferredoxin--NADP reductase, chloroplast precursor, putative, expressed
LOC_Os05g41200	0.864	0.000294372	OsCML9 - Calmodulin-related calcium sensor protein, expressed
LOC_Os04g21580	0.864	0.000294391	retrotransposon protein, putative, unclassified, expressed
LOC_Os02g48720	0.864	0.000295146	mitochondrial carrier protein, putative, expressed
LOC_Os03g64190	0.863	0.000299701	la domain containing protein, putative, expressed
LOC_Os10g35280	0.863	0.000299744	nucleolar complex protein 2, putative, expressed
LOC_Os10g30310	0.863	0.000299992	zinc finger, C3HC4 type domain containing protein, expressed
LOC_Os03g51210	0.863	0.000300406	expressed protein
LOC_Os12g06760	0.863	0.000300441	DEFL17 - Defensin and Defensin-like DEFL family
LOC_Os07g44620	0.863	0.000301603	eukaryotic translation initiation factor 6, putative, expressed
LOC_Os03g31400	0.863	0.000302892	U-box domain-containing protein, putative, expressed
LOC_Os12g07010	0.863	0.000304586	ribosomal protein L3, putative, expressed
LOC_Os11g19250	0.862	0.000305916	AARP2CN domain containing protein, expressed
LOC_Os02g10640	0.862	0.000308232	26S protease regulatory subunit, putative, expressed
LOC_Os10g42820	0.862	0.000309663	early-responsive to dehydration protein-related, putative, expressed
LOC_Os01g21850	0.862	0.000312032	protein transport protein-related, putative, expressed
LOC_Os01g73950	0.862	0.000312294	PPR repeat containing protein, expressed
LOC_Os01g47280	0.862	0.000312691	expressed protein
LOC_Os05g51570	0.862	0.000315163	vacuolar-processing enzyme precursor, putative, expressed
LOC_Os04g30880	0.862	0.000315932	TBC domain containing protein, expressed
LOC_Os10g34370	0.862	0.000316379	expressed protein
LOC_Os03g11180	0.861	0.000316723	cysteine proteinase inhibitor 6 precursor, putative, expressed
LOC_Os05g01262	0.861	0.000316913	translocon-associated protein beta domain containing protein, expressed
LOC_Os02g07870	0.861	0.000321418	ATP synthase, putative, expressed
LOC_Os05g02400	0.861	0.000321671	RNA recognition motif containing protein, expressed
LOC_Os02g41520	0.861	0.000322673	glycosyl transferase 8 domain containing protein, putative, expressed
LOC_Os01g28820	0.861	0.000323041	retrotransposon, putative, centromere-specific, expressed
LOC_Os11g33330	0.861	0.00032682	peptidase, M24 family protein, putative, expressed
LOC_Os01g25610	0.86	0.000327663	40S ribosomal protein S4, putative, expressed
LOC_Os08g33940	0.86	0.000327704	MYB family transcription factor, putative, expressed
LOC_Os04g58110	0.86	0.000328292	pyruvate kinase, putative, expressed
LOC_Os08g26990	0.86	0.000329574	response regulator receiver domain containing protein, expressed
LOC_Os03g57130	0.86	0.000330223	expressed protein
LOC_Os07g47180	0.86	0.000331733	transposon protein, putative, unclassified, expressed
LOC_Os02g50620	0.86	0.000332085	dehydrogenase E1 component domain containing protein, expressed
LOC_Os01g37800	0.86	0.0003321	ras-related protein, putative, expressed
LOC_Os08g28950	0.86	0.000332248	response regulator receiver domain containing protein, expressed
LOC_Os04g41950	0.86	0.000333272	calcium-binding mitochondrial protein anon-60Da, putative, expressed
LOC_Os09g39670	0.86	0.00033473	oxidoreductase, short chain dehydrogenase/reductase family domain containing family, expressed
LOC_Os01g21610	0.86	0.000335945	uncharacterized aarF domain-containing protein kinase 4, putative, expressed
LOC_Os02g08260	0.86	0.000336072	HD domain containing protein 2, putative, expressed
LOC_Os01g54590	0.86	0.000336074	ras-related protein, putative, expressed
LOC_Os02g10260	0.86	0.000336136	outer membrane protein, OMP85 family protein, expressed
LOC_Os04g58560	0.86	0.000336221	cysteine protease ATG4, putative, expressed
LOC_Os05g01050	0.86	0.000338664	DNA-binding protein-related, putative, expressed
LOC_Os04g10240	0.86	0.000338793	nicotiana lesion-inducing like, putative, expressed
LOC_Os12g04510	0.859	0.000339847	DNA-directed RNA polymerases I, II, and III subunit RPABC1, putative, expressed
LOC_Os02g05330	0.859	0.000339924	DEAD-box ATP-dependent RNA helicase, putative, expressed
LOC_Os03g59050	0.859	0.000342018	DEAD-box ATP-dependent RNA helicase, putative, expressed
LOC_Os07g38540	0.859	0.000343714	40S ribosomal protein S13, putative, expressed
LOC_Os05g02610	0.859	0.000343746	expressed protein
LOC_Os01g15029	0.859	0.000345267	expressed protein
LOC_Os01g74000	0.859	0.000347793	glycerol-3-phosphate dehydrogenase, putative, expressed
LOC_Os01g67000	0.859	0.000347819	membrane-associated 30 kDa protein, chloroplast precursor, putative, expressed
LOC_Os01g40420	0.859	0.000349543	CBS domain containing membrane protein, putative, expressed
LOC_Os10g19902	0.859	0.00035033	expressed protein
LOC_Os03g50820	0.859	0.000350467	cytochrome b561, putative, expressed
LOC_Os03g63090	0.858	0.000351166	actin-related protein 2/3 complex subunit 4, putative, expressed
LOC_Os02g44680	0.858	0.00035193	allantoin permease, putative, expressed
LOC_Os08g06020	0.858	0.000352681	MSP domain containing protein, expressed
LOC_Os03g03820	0.858	0.000355623	adenylate kinase, putative, expressed
LOC_Os08g06330	0.858	0.000358272	zinc finger C-x8-C-x5-C-x3-H type family protein, expressed
LOC_Os07g11060	0.858	0.0003589	expressed protein
LOC_Os02g13770	0.858	0.000360048	transposon protein, putative, CACTA, En/Spm sub-class, expressed
LOC_Os01g66850	0.858	0.000360807	pectinacetylesterase domain containing protein, expressed
LOC_Os02g38930	0.858	0.000361896	cytochrome P450 71D7, putative, expressed
LOC_Os12g32040	0.858	0.000362014	ZmEBE-1 protein, putative, expressed
LOC_Os10g28330	0.858	0.000362047	ZOS10-04 - C2H2 zinc finger protein, expressed
LOC_Os03g21950	0.858	0.000362277	fumarate hydratase, mitochondrial precursor, putative, expressed
LOC_Os01g18420	0.857	0.000362745	OsMADS88 - MADS-box family gene with M-gamma type-box, expressed
LOC_Os01g41630	0.857	0.000363573	serine/threonine protein phosphatase 2A 55 kDa regulatory subunit B, putative, expressed
LOC_Os06g01410	0.857	0.000364302	glutamine cyclotransferase precursor, putative, expressed
LOC_Os02g52930	0.857	0.00036729	integral membrane protein DUF6 containing protein, expressed
LOC_Os10g31520	0.857	0.000368464	ribosomal RNA assembly protein mis3, putative, expressed
LOC_Os03g44300	0.857	0.000369239	transketolase, putative, expressed
LOC_Os05g03490	0.857	0.000369902	expressed protein
LOC_Os01g28230	0.857	0.000370101	ZOS1-07 - C2H2 zinc finger protein, expressed
LOC_Os02g58020	0.857	0.000370497	ABC transporter, ATP-binding protein, putative, expressed
LOC_Os09g35970	0.857	0.000370542	6-phosphogluconolactonase, putative, expressed
LOC_Os02g01170	0.857	0.000370583	HECT-domain domain containing protein, expressed
LOC_Os05g41120	0.857	0.00037107	endoplasmic reticulum-Golgi intermediate compartment protein 3, putative, expressed
LOC_Os05g43120	0.857	0.000371225	GDSL-like lipase/acylhydrolase, putative, expressed
LOC_Os07g38730	0.857	0.000371431	tubulin/FtsZ domain containing protein, putative, expressed
LOC_Os11g48030	0.857	0.000372057	skp1 family, tetramerisation domain containing protein, expressed
LOC_Os02g03970	0.857	0.000372496	PPR repeat domain containing protein, putative, expressed
LOC_Os12g01430	0.857	0.000373396	ribosomal protein L10, putative, expressed
LOC_Os08g07970	0.856	0.000374877	transcription factor, putative, expressed
LOC_Os07g41750	0.856	0.000375539	40S ribosomal protein S3-1, putative, expressed
LOC_Os05g23620	0.856	0.000376086	cytochrome c1-1, heme protein, mitochondrial precursor, putative, expressed
LOC_Os03g44430	0.856	0.000377212	ubiquitin carboxyl-terminal hydrolase, family 1, putative, expressed
LOC_Os03g46690	0.856	0.000379595	OsFBX105 - F-box domain containing protein, expressed
LOC_Os03g63500	0.856	0.000381271	ATPase, AFG1 family domain containing protein, expressed
LOC_Os03g01900	0.856	0.000381932	40S ribosomal protein S17, putative, expressed
LOC_Os05g47980	0.856	0.000382266	ATP synthase, putative, expressed
LOC_Os01g56600	0.856	0.000382572	signal recognition particle 54 kDa protein, putative, expressed
LOC_Os06g13810	0.856	0.000383007	pyrophosphate--fructose 6-phosphate 1-phosphotransferase subunit beta, putative, expressed
LOC_Os09g36770	0.856	0.000383361	NTMC2Type1.2 protein, putative, expressed
LOC_Os01g01670	0.856	0.000383629	expressed protein
LOC_Os06g21120	0.856	0.00038394	expressed protein
LOC_Os08g12820	0.856	0.000383968	proteasome/cyclosome repeat containing protein, expressed
LOC_Os08g38350	0.856	0.000384411	expressed protein
LOC_Os01g46980	0.856	0.000386761	vacuolar ATP synthase subunit E, putative, expressed
LOC_Os09g08300	0.856	0.000387167	expressed protein
LOC_Os12g35580	0.855	0.000390365	riboflavin synthase alpha chain, putative, expressed
LOC_Os01g71050	0.855	0.000391147	MSP domain containing protein, putative, expressed
LOC_Os06g22420	0.855	0.000393761	ZOS6-04 - C2H2 zinc finger protein, expressed
LOC_Os05g49150	0.855	0.000396002	eukaryotic translation initiation factor 3 subunit D, putative, expressed
LOC_Os03g21810	0.855	0.000397762	insulin-degrading enzyme, putative, expressed
LOC_Os06g39870	0.855	0.000397869	26S protease regulatory subunit 8, putative, expressed
LOC_Os05g38230	0.855	0.000397952	oxidoreductase, aldo/keto reductase family protein, putative, expressed
LOC_Os05g31000	0.855	0.000399434	nascent polypeptide-associated complex subunit alpha, putative, expressed
LOC_Os04g39210	0.855	0.0003997	agmatine deiminase, putative, expressed
LOC_Os01g47660	0.854	0.000401092	60S ribosomal protein L18a, putative, expressed
LOC_Os07g18750	0.854	0.000402491	LTPL42 - Protease inhibitor/seed storage/LTP family protein precursor, expressed
LOC_Os06g28970	0.854	0.000403413	bolA, putative, expressed
LOC_Os04g42230	0.854	0.000403911	expressed protein
LOC_Os11g40590	0.854	0.000405724	DUF1399 containing protein, putative, expressed
LOC_Os05g28280	0.854	0.000406024	peptidase, M24 family protein, putative, expressed
LOC_Os03g27370	0.854	0.000409049	phospholipase D, putative, expressed
LOC_Os02g38260	0.854	0.000410212	glycosyl hydrolase family 5 protein, putative, expressed
LOC_Os11g05410	0.854	0.000410218	Ser/Thr protein phosphatase family protein, putative, expressed
LOC_Os05g38550	0.854	0.000410574	ubiquitin-conjugating enzyme, putative, expressed
LOC_Os06g47200	0.854	0.000411807	LTPL85 - Protease inhibitor/seed storage/LTP family protein precursor, expressed
LOC_Os01g40750	0.854	0.000412258	expressed protein
LOC_Os11g42525	0.854	0.000412916	hypothetical protein
LOC_Os12g42876	0.854	0.000413117	5-methyltetrahydropteroyltriglutamate--homocysteine methyltransferase, putative, expressed
LOC_Os10g20540	0.854	0.000413176	DEFL69 - Defensin and Defensin-like DEFL family
LOC_Os10g38700	0.853	0.00041379	glutathione S-transferase, putative, expressed
LOC_Os02g18410	0.853	0.000413864	salt stress root protein RS1, putative, expressed
LOC_Os09g12600	0.853	0.000415793	phosphate/phosphate translocator, putative, expressed
LOC_Os05g35460	0.853	0.000415833	patellin protein, putative, expressed
LOC_Os08g17160	0.853	0.000416093	plastocyanin-like domain containing protein, putative, expressed
LOC_Os05g09400	0.853	0.000416197	30S ribosomal protein S31, chloroplast precursor, putative, expressed
LOC_Os08g40060	0.853	0.000418574	expressed protein
LOC_Os12g38790	0.853	0.000419729	targeting protein for Xklp2 containing protein, expressed
LOC_Os12g07490	0.853	0.000419982	protein transport protein Sec61 subunit beta, putative, expressed
LOC_Os08g37320	0.853	0.000421334	expressed protein
LOC_Os06g01890	0.853	0.000421722	MADS-box transcription factor, putative, expressed
LOC_Os02g02470	0.853	0.0004224	oxidoreductase, short chain dehydrogenase/reductase family domain containing protein, expressed
LOC_Os03g50540	0.853	0.000422863	2Fe-2S iron-sulfur cluster binding domain containing protein, expressed
LOC_Os02g03690	0.853	0.000425844	beta-amylase, putative, expressed
LOC_Os03g27320	0.852	0.000428365	steroid binding protein, putative, expressed
LOC_Os08g33340	0.852	0.000429091	RAD23 DNA repair protein, putative, expressed
LOC_Os01g10820	0.852	0.000431662	ribosomal protein L5, putative, expressed
LOC_Os01g15979	0.852	0.000432485	gb protein, putative, expressed
LOC_Os01g34860	0.852	0.00043385	expressed protein
LOC_Os06g49110	0.852	0.000434599	delta-aminolevulinic acid dehydratase, chloroplast precursor, putative, expressed
LOC_Os05g02060	0.852	0.00043481	mitochondrial import inner membrane translocase subunit Tim17, putative, expressed
LOC_Os09g28880	0.852	0.000439109	DUF617 domain containing protein, expressed
LOC_Os03g62620	0.851	0.000442655	late embryogenesis abundant protein, putative, expressed
LOC_Os05g16300	0.851	0.000445841	expressed protein
LOC_Os09g19734	0.851	0.000447663	isochorismate synthase 1, chloroplast precursor, putative, expressed
LOC_Os07g02210	0.851	0.000448476	eukaryotic translation initiation factor 5A, putative, expressed
LOC_Os02g05744	0.851	0.000448859	endoglucanase, putative, expressed
LOC_Os06g04290	0.851	0.000449347	S10/S20 domain containing ribosomal protein, putative, expressed
LOC_Os04g58620	0.851	0.000450351	potasium efflux antiporter protein, putative, expressed
LOC_Os12g05780	0.851	0.000451013	transporter-related, putative, expressed
LOC_Os12g44380	0.851	0.000451279	sucrose transporter, putativ, expressed
LOC_Os08g04670	0.851	0.000453964	expressed protein
LOC_Os01g51060	0.85	0.000456136	hydrolase, putative, expressed
LOC_Os08g06474	0.85	0.000456709	ribosomal protein L13, putative, expressed
LOC_Os08g34190	0.85	0.000456937	stromal cell-derived factor 2-like protein precursor, putative, expressed
LOC_Os10g07510	0.85	0.000460329	DUF260 domain containing protein, putative, expressed
LOC_Os02g19880	0.85	0.000461321	expressed protein
LOC_Os04g35280	0.85	0.000461853	neutral/alkaline invertase, putative, expressed
LOC_Os01g48960	0.85	0.000462502	glutamate synthase, chloroplast precursor, putative, expressed
LOC_Os04g59320	0.85	0.000463065	protein kinase domain containing protein, expressed
LOC_Os10g28200	0.85	0.000463862	NAD dependent epimerase/dehydratase family protein, putative, expressed
LOC_Os02g58340	0.85	0.000464176	oligopeptidase, putative, expressed
LOC_Os11g42450	0.85	0.000464287	leucine-rich repeat family protein, putative, expressed
LOC_Os04g35170	0.85	0.000464808	expressed protein
LOC_Os05g49120	0.85	0.000464967	NLI interacting factor-like phosphatase, putative, expressed
LOC_Os04g50990	0.85	0.00046794	L11 domain containing ribosomal protein, putative, expressed
LOC_Os08g16880	0.85	0.000468044	sas10/Utp3 family protein, expressed
LOC_Os04g01290	0.85	0.000469268	proteasome subunit, putative, expressed
LOC_Os03g05806	0.849	0.000470395	pseudouridine synthase family protein, putative, expressed
LOC_Os01g11920	0.849	0.000471134	retrotransposon protein, putative, unclassified, expressed
LOC_Os12g07050	0.849	0.000471498	RNA polymerase II subunit A C-terminal domain phosphatase ssu72, putative, expressed
LOC_Os04g32660	0.849	0.000472451	cytochrome b-c1 complex subunit Rieske, mitochondrial precursor, putative, expressed
LOC_Os10g08550	0.849	0.000473506	enolase, putative, expressed
LOC_Os11g29680	0.849	0.000474046	expressed protein
LOC_Os08g39830	0.849	0.000475002	ethylene-insensitive 3, putative, expressed
LOC_Os01g63880	0.849	0.000476162	expressed protein
LOC_Os11g42430	0.849	0.000477769	transporter family protein, putative, expressed
LOC_Os07g35650	0.849	0.000479497	TKL_IRAK_DUF26-lc.2 - DUF26 kinases have homology to DUF26 containing loci, expressed
LOC_Os06g44910	0.849	0.000479687	OsGrx_C4 - glutaredoxin subgroup I, expressed
LOC_Os04g36770	0.849	0.000482517	PME/invertase inhibitor, putative, expressed
LOC_Os09g34100	0.849	0.000483889	metallo-beta-lactamase family protein, putative, expressed
LOC_Os05g50220	0.849	0.000484075	pex14, putative, expressed
LOC_Os01g65790	0.848	0.000486046	pectinesterase, putative, expressed
LOC_Os01g43160	0.848	0.000486576	polygalacturonase, putative, expressed
LOC_Os07g32380	0.848	0.00048659	protein phosphatase 2C, putative, expressed
LOC_Os06g33930	0.848	0.000486956	Divergent PAP2 family domain containing protein, expressed
LOC_Os01g64090	0.848	0.00048724	L1P family of ribosomal proteins domain containing protein, expressed
LOC_Os03g09850	0.848	0.000487794	auxin-responsive protein-related, putative, expressed
LOC_Os07g40580	0.848	0.000490487	eukaryotic translation initiation factor 5A, putative, expressed
LOC_Os02g28810	0.848	0.000492744	ribosomal protein, putative, expressed
LOC_Os07g42450	0.848	0.000493747	ribosomal protein S2, putative, expressed
LOC_Os12g25700	0.848	0.000494082	UDP-glucose 6-dehydrogenase, putative, expressed
LOC_Os05g44320	0.848	0.000494153	WD domain, G-beta repeat domain containing protein, expressed
LOC_Os05g11780	0.848	0.000494279	mitochondrial carrier protein, putative, expressed
LOC_Os10g01540	0.848	0.000497934	notchless protein, putative, expressed
LOC_Os03g48220	0.848	0.000498098	expressed protein
LOC_Os12g22680	0.847	0.000500303	histone H3, putative, expressed
LOC_Os06g03920	0.847	0.000503417	expressed protein
LOC_Os03g09300	0.847	0.000503429	pumilio-family RNA binding repeat containing protein, expressed
LOC_Os03g18180	0.847	0.000503484	ranBP1 domain containing protein, expressed
LOC_Os09g25390	0.847	0.000504597	phospholipase D, putative, expressed
LOC_Os12g22650	0.847	0.000504736	histone H3, putative, expressed
LOC_Os09g26650	0.847	0.000505309	2Fe-2S iron-sulfur cluster binding domain containing protein, expressed
LOC_Os06g36490	0.847	0.00050649	ethylene-responsive element-binding protein, putative, expressed
LOC_Os02g34560	0.847	0.000506928	plant neutral invertase domain containing protein, expressed
LOC_Os07g31300	0.847	0.000507273	ATP synthase delta chain, mitochondrial precursor, putative, expressed
LOC_Os11g42520	0.847	0.000509195	DEFL34 - Defensin and Defensin-like DEFL family, expressed
LOC_Os02g15610	0.847	0.000510645	40S ribosomal protein S15a, putative, expressed
LOC_Os05g47970	0.847	0.000510941	microtubule associated protein, putative, expressed
LOC_Os11g06750	0.847	0.00051129	ribosomal protein L3, putative, expressed
LOC_Os08g39440	0.847	0.000514205	RNA recognition motif containing protein, putative, expressed
LOC_Os01g64480	0.847	0.000514981	harpin-induced protein 1 domain containing protein, expressed
LOC_Os09g32976	0.847	0.000515413	ribosomal protein L7Ae, putative, expressed
LOC_Os04g26850	0.846	0.000517147	SAD2, putative, expressed
LOC_Os03g02030	0.846	0.000517176	folylpolyglutamate synthase, mitochondrial precursor, putative, expressed
LOC_Os05g22940	0.846	0.000519737	acetyl-CoA carboxylase, putative, expressed
LOC_Os03g53310	0.846	0.000520234	emp24/gp25L/p24 family protein, putative, expressed
LOC_Os11g08285	0.846	0.000520846	expressed protein
LOC_Os03g02280	0.846	0.000522662	DUF584 domain containing protein, putative, expressed
LOC_Os07g12220	0.846	0.000523331	expressed protein
LOC_Os03g30000	0.846	0.000523347	glycosyl transferase 8 domain containing protein, putative, expressed
LOC_Os04g49220	0.846	0.000525134	mitochondrial import inner membrane translocase subunit Tim, putative, expressed
LOC_Os01g56580	0.846	0.000526235	CK1_CaseinKinase_1a.3 - CK1 includes the casein kinase 1 kinases, expressed
LOC_Os04g36040	0.846	0.000528103	peptide transporter PTR2, putative, expressed
LOC_Os01g59730	0.846	0.000528761	ribosomal protein L7Ae, putative, expressed
LOC_Os02g49620	0.846	0.000529284	expressed protein
LOC_Os12g07140	0.846	0.000529778	expressed protein
LOC_Os03g53360	0.846	0.00053046	transferase family protein, putative, expressed
LOC_Os03g38980	0.846	0.000530608	tRNA synthetases class II domain containing protein, expressed
LOC_Os05g39390	0.846	0.000530778	outer membrane protein, OMP85 family protein, expressed
LOC_Os02g41610	0.845	0.000532318	expressed protein
LOC_Os04g02730	0.845	0.000533471	tRNA-dihydrouridine synthase 3-like, putative, expressed
LOC_Os02g09190	0.845	0.000534298	cytochrome P450, putative, expressed
LOC_Os02g04270	0.845	0.000534508	DNA polymerase V, putative, expressed
LOC_Os03g58204	0.845	0.000535902	ribosomal protein L4, putative, expressed
LOC_Os09g38000	0.845	0.000536128	no apical meristem protein, putative, expressed
LOC_Os03g11410	0.845	0.000536264	mitochondrial-processing peptidase subunit, mitochondrial precursor, putative, expressed
LOC_Os01g67134	0.845	0.000536465	ribosomal L18p/L5e family protein, putative, expressed
LOC_Os12g42230	0.845	0.000538602	transketolase, putative, expressed
LOC_Os04g54410	0.845	0.000538783	expressed protein
LOC_Os04g40874	0.845	0.000539527	glucose-6-phosphate 1-dehydrogenase, cytoplasmic isoform, putative, expressed
LOC_Os08g13110	0.845	0.000540815	hypothetical protein
LOC_Os04g44840	0.845	0.000541342	glycosyl hydrolase family 3 protein, putative, expressed
LOC_Os01g66350	0.845	0.000541472	DUF647 domain containing protein, putative, expressed
LOC_Os01g07520	0.845	0.000541765	proline-rich family protein, putative, expressed
LOC_Os01g10450	0.845	0.000541952	protein kinase domain containing protein, expressed
LOC_Os02g52860	0.845	0.000543601	phosphate carrier protein, mitochondrial precursor, putative, expressed
LOC_Os07g22720	0.845	0.000545021	2-oxo acid dehydrogenases acyltransferase domain containing protein, expressed
LOC_Os05g30530	0.845	0.000545395	40S ribosomal protein S4, putative, expressed
LOC_Os06g50146	0.845	0.000546722	calcium-dependent protein kinase CPK1 adapter protein 2, putative, expressed
LOC_Os08g04460	0.844	0.000549381	NADPH-dependent FMN reductase domain containing protein, expressed
LOC_Os01g01510	0.844	0.000550178	sas10/Utp3 family protein, expressed
LOC_Os09g12270	0.844	0.000552219	peptidyl-prolyl cis-trans isomerase, FKBP-type, putative, expressed
LOC_Os09g10820	0.844	0.000552885	oxidoreductase domain protein, putative, expressed
LOC_Os07g26974	0.844	0.00055471	expressed protein
LOC_Os01g22520	0.844	0.000556059	dihydrolipoyl dehydrogenase 1, mitochondrial precursor, putative, expressed
LOC_Os04g52940	0.844	0.000558538	SIT4 phosphatase-associated protein domain containing protein, expressed
LOC_Os11g38670	0.844	0.000559173	DEAD-box ATP-dependent RNA helicase, putative, expressed
LOC_Os08g09190	0.844	0.000561642	auxin efflux carrier component, putative, expressed
LOC_Os06g03540	0.844	0.000561934	oligopeptide transporter, putative, expressed
LOC_Os01g46060	0.843	0.000565286	NUC189 domain containing protein, expressed
LOC_Os06g35730	0.843	0.000565526	ribosomal protein L5, putative, expressed
LOC_Os08g08820	0.843	0.000566444	homeobox and START domains containing protein, putative, expressed
LOC_Os07g23244	0.843	0.00056709	ribosomal protein L23 family protein, putative, expressed
LOC_Os09g39350	0.843	0.000568738	expressed protein
LOC_Os12g34854	0.843	0.000569245	RNA polymerase Rpb7, N-terminal domain containing protein, expressed
LOC_Os06g02490	0.843	0.000569478	acyl CoA binding protein, putative, expressed
LOC_Os01g74330	0.843	0.000570549	pectinacetylesterase domain containing protein, expressed
LOC_Os03g06580	0.843	0.000570703	MTN26L2 - MtN26 family protein precursor, expressed
LOC_Os09g38080	0.843	0.000571274	retrotransposon protein, putative, unclassified, expressed
LOC_Os01g51190	0.843	0.000574214	expressed protein
LOC_Os03g38120	0.843	0.000574878	expressed protein
LOC_Os01g66720	0.843	0.00057489	NADP-dependent oxidoreductase, putative, expressed
LOC_Os06g47320	0.843	0.000574983	T-complex protein, putative, expressed
LOC_Os05g30535	0.843	0.000576736	hypothetical protein
LOC_Os12g03880	0.843	0.000576812	60S acidic ribosomal protein P0, putative, expressed
LOC_Os12g24130	0.843	0.00057746	expressed protein
LOC_Os11g33240	0.843	0.000579417	citrate synthase, putative, expressed
LOC_Os12g38870	0.842	0.00058243	expressed protein
LOC_Os03g05260	0.842	0.000582469	ankyrin repeat domain containing protein, expressed
LOC_Os02g21650	0.842	0.000582822	prefoldin, putative, expressed
LOC_Os01g35240	0.842	0.000585227	hypothetical protein
LOC_Os07g43390	0.842	0.00058578	4-alpha-glucanotransferase, chloroplast precursor, putative, expressed
LOC_Os02g09270	0.842	0.000586144	cytochrome P450 71A1, putative, expressed
LOC_Os03g53700	0.842	0.000587673	PHD-finger domain containing protein, putative, expressed
LOC_Os05g45950	0.842	0.000591321	outer mitochondrial membrane porin, putative, expressed
LOC_Os02g49080	0.842	0.000593065	KH domain containing protein, putative, expressed
LOC_Os08g43430	0.842	0.000597296	CXE carboxylesterase, putative, expressed
LOC_Os03g03450	0.842	0.000598683	anthranilate phosphoribosyltransferase, chloroplast precursor, putative, expressed
LOC_Os04g06530	0.841	0.000600135	MEGL12 - Maternally expressed gene MEG family protein precursor, expressed
LOC_Os02g01230	0.841	0.000601239	ribosomal protein, putative, expressed
LOC_Os05g15140	0.841	0.000603689	expressed protein
LOC_Os10g37540	0.841	0.000604913	OsFBDUF48 - F-box and DUF domain containing protein, expressed
LOC_Os08g05830	0.841	0.000605142	transaldolase, putative, expressed
LOC_Os03g37490	0.841	0.00060569	MATE efflux family protein, putative, expressed
LOC_Os01g13700	0.841	0.000606446	DNA-binding protein-related, putative, expressed
LOC_Os01g55450	0.841	0.000606984	CAMK_KIN1/SNF1/Nim1_like.11 - CAMK includes calcium/calmodulin depedent protein kinases, expressed
LOC_Os12g34300	0.841	0.000607414	OsFBX454 - F-box domain containing protein, expressed
LOC_Os09g35540	0.841	0.000608026	expressed protein
LOC_Os10g39810	0.841	0.000608881	fatty acid hydroxylase, putative, expressed
LOC_Os12g21798	0.841	0.000609078	40S ribosomal protein S3a, putative, expressed
LOC_Os03g51220	0.841	0.000609198	SWI/SNF-related matrix-associated actin-dependent regulator of chromatin subfamily C member, putative, expressed
LOC_Os01g69970	0.841	0.000611096	WD domain, G-beta repeat domain containing protein, expressed
LOC_Os09g32100	0.841	0.00061113	expressed protein
LOC_Os04g32330	0.841	0.000613146	dihydrolipoyllysine-residue succinyltransferase component of 2-oxoglutarate dehydrogenase complex, mitochondrial precursor, putative, expressed
LOC_Os09g32500	0.841	0.000614177	60S ribosomal protein L32, putative, expressed
LOC_Os11g32100	0.84	0.000620626	inducer of CBF expression 1, putative, expressed
LOC_Os02g04325	0.84	0.000620876	expressed protein
LOC_Os03g57320	0.84	0.000621275	expp1 protein precursor, putative, expressed
LOC_Os07g30840	0.84	0.000621935	proteasome subunit, putative, expressed
LOC_Os09g38690	0.84	0.000622714	transporter family protein, putative, expressed
LOC_Os07g07709	0.84	0.000624211	ribosomal protein S13p/S18e, putative, expressed
LOC_Os06g01990	0.84	0.000624505	phosphoglycolate phosphatase, plasmid, putative, expressed
LOC_Os02g51550	0.84	0.000625057	DUF581 domain containing protein, expressed
LOC_Os02g13530	0.84	0.000627411	40S ribosomal protein S24, putative, expressed
LOC_Os01g42294	0.84	0.000627717	inactive receptor kinase At2g26730 precursor, putative, expressed
LOC_Os02g27769	0.84	0.000628513	40S ribosomal protein S27, putative, expressed
LOC_Os01g41610	0.84	0.000629948	mitochondrial ATP synthase g subunit family protein, putative, expressed
LOC_Os02g54700	0.84	0.000629989	RNA recognition motif containing protein, putative, expressed
LOC_Os01g71980	0.84	0.000631776	rho-GTPase-activating protein-like, putative, expressed
LOC_Os12g40930	0.84	0.000632271	expressed protein
LOC_Os11g13670	0.84	0.000636457	gibberellin receptor GID1L2, putative, expressed
LOC_Os05g25630	0.839	0.000637182	inhibitor I family protein, putative, expressed
LOC_Os03g13170	0.839	0.000637368	ubiquitin fusion protein, putative, expressed
LOC_Os12g04010	0.839	0.000639882	M-phase phosphoprotein 10, putative, expressed
LOC_Os01g11900	0.839	0.000640647	hhH-GPD superfamily base excision DNA repair protein, expressed
LOC_Os04g46460	0.839	0.000640966	amino acid kinase, putative, expressed
LOC_Os10g35490	0.839	0.000642568	hydrolase, alpha/beta fold family domain containing protein, expressed
LOC_Os04g54620	0.839	0.000647246	expressed protein
LOC_Os07g48170	0.839	0.000647392	nucleotidyltransferase, putative, expressed
LOC_Os01g11810	0.839	0.000647744	powdery mildew resistant protein 5, putative, expressed
LOC_Os08g33330	0.839	0.000648717	protein kinase PKN/PRK1, effector, putative, expressed
LOC_Os02g09920	0.839	0.000648888	PHD-finger domain containing protein, putative, expressed
LOC_Os07g43200	0.839	0.000649612	retrotransposon protein, putative, LINE subclass, expressed
LOC_Os05g01310	0.839	0.000651278	ankyrin repeat family protein, putative, expressed
LOC_Os10g07998	0.839	0.000652044	nodulin, putative, expressed
LOC_Os01g27020	0.839	0.000652329	transposon protein, putative, unclassified, expressed
LOC_Os12g05650	0.839	0.000652578	ACT domain containing protein, expressed
LOC_Os11g42530	0.839	0.000654627	DEFL25 - Defensin and Defensin-like DEFL family
LOC_Os04g40860	0.838	0.000655782	transposon protein, putative, unclassified, expressed
LOC_Os07g10250	0.838	0.000656499	DEAD-box ATP-dependent RNA helicase 52B, putative, expressed
LOC_Os06g27770	0.838	0.000656519	isoflavone reductase homolog IRL, putative, expressed
LOC_Os02g58480	0.838	0.000657859	sucrose synthase, putative, expressed
LOC_Os02g57670	0.838	0.000659313	ribosomal L9, putative, expressed
LOC_Os04g35300	0.838	0.00065978	SLL1 protein, putative, expressed
LOC_Os11g36410	0.838	0.000660423	NBS-LRR type disease resistance protein, putative, expressed
LOC_Os10g31950	0.838	0.000662511	3-ketoacyl-CoA thiolase, peroxisomal precursor, putative, expressed
LOC_Os09g29070	0.838	0.000663369	glucose-6-phosphate isomerase, putative, expressed
LOC_Os08g09100	0.838	0.000664266	RNA recognition motif containing protein, putative, expressed
LOC_Os05g05840	0.838	0.000668047	tRNA synthetase class II core domain containing protein, expressed
LOC_Os02g33230	0.838	0.00066821	nucleoside-diphosphate-sugar epimerase, putative, expressed
LOC_Os02g44630	0.838	0.000668494	aquaporin protein, putative, expressed
LOC_Os07g42950	0.838	0.000669729	40S ribosomal protein S6, putative, expressed
LOC_Os05g12580	0.838	0.000673704	expressed protein
LOC_Os03g02170	0.837	0.000674998	transmembrane and coiled-coil domain-containing protein 4, putative, expressed
LOC_Os03g46610	0.837	0.000675258	DEAD-box ATP-dependent RNA helicase, putative, expressed
LOC_Os10g19904	0.837	0.000676655	expressed protein
LOC_Os03g08050	0.837	0.000676742	elongation factor Tu, putative, expressed
LOC_Os03g55150	0.837	0.000677087	eukaryotic translation initiation factor 5A, putative, expressed
LOC_Os03g06880	0.837	0.000677684	kinase, pfkB family, putative, expressed
LOC_Os02g07220	0.837	0.000681892	peptidyl-prolyl cis-trans isomerase, FKBP-type, putative, expressed
LOC_Os03g48090	0.837	0.000682067	WD domain, G-beta repeat domain containing protein, expressed
LOC_Os03g12900	0.837	0.000682396	squalene monooxygenase, putative, expressed
LOC_Os06g33720	0.837	0.000682565	flavin-containing monooxygenase family protein, putative, expressed
LOC_Os06g11320	0.837	0.00068494	peptidyl-prolyl cis-trans isomerase CYP40, putative, expressed
LOC_Os02g50174	0.837	0.000688187	caleosin related protein, putative, expressed
LOC_Os06g10760	0.837	0.000688829	emp24/gp25L/p24 family protein, putative, expressed
LOC_Os01g62810	0.837	0.000689362	regulator of chromosome condensation, putative, expressed
LOC_Os04g51370	0.837	0.000690493	protein kinase, putative, expressed
LOC_Os11g48020	0.837	0.000690521	fatty acid hydroxylase, putative, expressed
LOC_Os07g42234	0.837	0.000690999	retrotransposon protein, putative, unclassified, expressed
LOC_Os12g25170	0.837	0.00069401	NB-ARC domain containing disease resistance protein, putative, expressed
LOC_Os07g32570	0.837	0.000694383	OsAPRL1 adenosine 5'-phosphosulfate reductase-like OsAPRL1, expressed
LOC_Os12g04520	0.836	0.000696367	FAD-binding and arabino-lactone oxidase domains containing protein, putative, expressed
LOC_Os03g59220	0.836	0.000696591	cytochrome b-c1 complex subunit 7, putative, expressed
LOC_Os05g25194	0.836	0.000697171	metal cation transporter, putative, expressed
LOC_Os04g51240	0.836	0.000697513	EF hand family protein, putative, expressed
LOC_Os01g63680	0.836	0.000700232	MYB family transcription factor, putative, expressed
LOC_Os06g11180	0.836	0.000700282	OsPOP12 - Putative Prolyl Oligopeptidase homologue, expressed
LOC_Os07g42300	0.836	0.000701266	elongation factor protein, putative, expressed
LOC_Os06g36700	0.836	0.000701943	T-complex protein, putative, expressed
LOC_Os09g31080	0.836	0.00070231	induced stolen tip protein TUB8, putative, expressed
LOC_Os01g33030	0.836	0.000704433	Brix domain containing protein, putative, expressed
LOC_Os01g13430	0.836	0.000705246	importin-alpha re-exporter, putative, expressed
LOC_Os02g43280	0.836	0.000705786	aldehyde dehydrogenase, putative, expressed
LOC_Os10g35520	0.836	0.000706644	hydrolase, alpha/beta fold family domain containing protein, expressed
LOC_Os01g70140	0.836	0.000707377	ubiquitin-conjugating enzyme E2-22 kDa, putative, expressed
LOC_Os06g07160	0.836	0.000709413	expressed protein
LOC_Os02g46990	0.836	0.000712881	AAA-type ATPase family protein, putative, expressed
LOC_Os03g53600	0.835	0.000714868	HTH DNA-binding protein, putative, expressed
LOC_Os11g18940	0.835	0.000715411	WW domain containing protein, expressed
LOC_Os05g41670	0.835	0.000716803	ICE-like protease p20 domain containing protein, putative, expressed
LOC_Os09g31280	0.835	0.000717307	OTU-like cysteine protease family protein, putative, expressed
LOC_Os01g60660	0.835	0.000718356	methionyl-tRNA synthetase, putative, expressed
LOC_Os04g59010	0.835	0.000718736	F-box domain containing protein, expressed
LOC_Os02g07490	0.835	0.000721089	glyceraldehyde-3-phosphate dehydrogenase, putative, expressed
LOC_Os01g69230	0.835	0.000721621	exo70 exocyst complex subunit domain containing protein, expressed
LOC_Os09g24230	0.835	0.000725051	haloacid dehalogenase-like hydrolase family protein, putative, expressed
LOC_Os07g47420	0.835	0.000727143	60S ribosome subunit biogenesis protein NIP7, putative, expressed
LOC_Os12g25150	0.835	0.00072817	retrotransposon protein, putative, Ty3-gypsy subclass, expressed
LOC_Os03g63400	0.835	0.00072846	transcription factor BTF3, putative, expressed
LOC_Os02g58650	0.835	0.000734347	expressed protein
LOC_Os06g02390	0.835	0.000735049	ADP-ribosylation factor 1, putative, expressed
LOC_Os09g10600	0.835	0.000735119	enoyl-acyl-carrier-protein reductase NADH, chloroplast precursor, expressed
LOC_Os05g49880	0.834	0.000735627	lactate/malate dehydrogenase, putative, expressed
LOC_Os01g49190	0.834	0.000736464	ATP synthase, putative, expressed
LOC_Os01g65670	0.834	0.000736881	amino acid transporter, putative, expressed
LOC_Os01g12090	0.834	0.000737417	ribosomal protein S6 family protein, putative, expressed
LOC_Os08g42690	0.834	0.000738832	ankyrin repeat domain containing protein, expressed
LOC_Os05g11710	0.834	0.000739667	ribosomal protein L5, putative, expressed
LOC_Os01g43030	0.834	0.00074001	tetratricopeptide repeat domain containing protein, expressed
LOC_Os03g14530	0.834	0.000743292	S10/S20 domain containing ribosomal protein, putative, expressed
LOC_Os03g04460	0.834	0.000743321	outer mitochondrial membrane porin, putative, expressed
LOC_Os11g04060	0.834	0.000745487	major facilitator superfamily antiporter, putative, expressed
LOC_Os05g36110	0.834	0.000746485	protein of unknown function DUF502 domain containing protein, expressed
LOC_Os03g11990	0.834	0.000747196	bolA, putative, expressed
LOC_Os01g53700	0.834	0.000748097	mitochondrial-processing peptidase subunit, mitochondrial precursor, putative, expressed
LOC_Os10g27380	0.834	0.000749019	expressed protein
LOC_Os10g41190	0.834	0.000750763	transporter family protein, putative, expressed
LOC_Os02g03260	0.834	0.000753045	3-isopropylmalate dehydratase large subunit 2, putative, expressed
LOC_Os04g57520	0.834	0.000754683	UBX domain-containing protein, putative, expressed
LOC_Os03g59020	0.834	0.000755003	T-complex protein, putative, expressed
LOC_Os03g56820	0.834	0.000756516	fatty acid hydroxylase, putative, expressed
LOC_Os04g50880	0.833	0.00075745	phosphoribulokinase/Uridine kinase family protein, expressed
LOC_Os01g74140	0.833	0.000760866	WRKY17, expressed
LOC_Os03g55280	0.833	0.000763417	semialdehyde dehydrogenase, NAD binding domain containing protein, putative, expressed
LOC_Os03g53650	0.833	0.000763694	cysteine synthase, putative, expressed
LOC_Os09g35730	0.833	0.000764344	OsRhmbd16 - Putative Rhomboid homologue, expressed
LOC_Os04g40730	0.833	0.000764405	oxidoreductase, short chain dehydrogenase/reductase family, putative, expressed
LOC_Os09g33500	0.833	0.00076545	transketolase, putative, expressed
LOC_Os03g12700	0.833	0.00076582	expressed protein
LOC_Os01g69990	0.833	0.000766367	GYF domain containing protein, putative, expressed
LOC_Os11g34824	0.833	0.00076696	expressed protein
LOC_Os06g41990	0.833	0.000766972	M16 domain containing zinc peptidase, putative, expressed
LOC_Os02g58170	0.833	0.000767432	transposon protein, putative, unclassified, expressed
LOC_Os01g51770	0.833	0.000768744	outer mitochondrial membrane porin, putative, expressed
LOC_Os04g56590	0.833	0.000768937	ATP/GTP binding protein, putative, expressed
LOC_Os06g36400	0.833	0.000771538	HAD superfamily phosphatase, putative, expressed
LOC_Os05g19000	0.833	0.000772946	expressed protein
LOC_Os07g44650	0.832	0.000778548	LYR motif containing protein, putative, expressed
LOC_Os02g37420	0.832	0.000778997	ras-related protein, putative, expressed
LOC_Os01g16030	0.832	0.000780753	ADP-ribosylation factor, putative, expressed
LOC_Os06g11330	0.832	0.000781812	OsMADS55 - MADS-box family gene with MIKCc type-box, expressed
LOC_Os05g06280	0.832	0.000782647	ATKINESIN-13A/KINESIN-13A, putative, expressed
LOC_Os03g61960	0.832	0.00078435	2Fe-2S iron-sulfur cluster binding domain containing protein, expressed
LOC_Os03g08020	0.832	0.00078457	elongation factor Tu, putative, expressed
LOC_Os12g42980	0.832	0.000784743	cysteine synthase, putative, expressed
LOC_Os03g18570	0.832	0.000786702	40S ribosomal protein S7, putative, expressed
LOC_Os07g29390	0.832	0.000788461	peptidyl-prolyl cis-trans isomerase, putative, expressed
LOC_Os07g13230	0.832	0.000789099	eukaryotic initiation factor 5A hypusine, DNA-binding OB fold family protein, expressed
LOC_Os07g12650	0.832	0.000789617	ribosomal protein L7Ae, putative, expressed
LOC_Os06g06410	0.832	0.000790467	rRNA-processing protein FCF, putative, expressed
LOC_Os07g49520	0.832	0.000791155	2-oxoglutarate dehydrogenase E1 component, mitochondrial precursor, putative, expressed
LOC_Os11g04370	0.832	0.000792804	ribosomal protein L24, putative, expressed
LOC_Os01g54910	0.832	0.000793105	GTP-binding protein typA/bipA, putative, expressed
LOC_Os06g02144	0.832	0.000793667	6-phosphogluconate dehydrogenase, decarboxylating, putative, expressed
LOC_Os02g01332	0.832	0.000794059	ribosomal protein L6, putative, expressed
LOC_Os07g12250	0.832	0.000794502	ribosomal protein L24, putative, expressed
LOC_Os01g41190	0.832	0.000799764	glycine-rich protein, putative, expressed
LOC_Os02g29220	0.831	0.000803294	expressed protein
LOC_Os05g08560	0.831	0.00080406	transposon protein, putative, unclassified, expressed
LOC_Os02g05340	0.831	0.000804264	proteasome/cyclosome repeat containing protein, expressed
LOC_Os03g18500	0.831	0.000806698	mitochondrial import inner membrane translocase subunit Tim17, putative, expressed
LOC_Os02g55220	0.831	0.000809362	carboxyl-terminal proteinase, putative
LOC_Os03g53050	0.831	0.000813268	WRKY121, expressed
LOC_Os02g40830	0.831	0.000817756	succinyl-CoA ligase beta-chain, mitochondrial precursor, putative, expressed
LOC_Os05g25950	0.831	0.000818522	cyclin, putative, expressed
LOC_Os08g25720	0.831	0.00081856	pyrophosphate--fructose 6-phosphate 1-phosphotransferase subunit alpha, putative, expressed
LOC_Os05g48620	0.831	0.000821588	tRNA-binding arm, putative, expressed
LOC_Os05g05560	0.83	0.000823495	expressed protein
LOC_Os10g02240	0.83	0.000827447	peptide transporter PTR2, putative, expressed
LOC_Os02g55280	0.83	0.000831869	NLI interacting factor-like phosphatase, putative, expressed
LOC_Os01g73890	0.83	0.000832602	transcription initiation factor IIA gamma chain, putative, expressed
LOC_Os07g13270	0.83	0.000833245	SNF7 domain containing protein, putative, expressed
LOC_Os01g33550	0.83	0.00083441	MEGL19 - Maternally expressed gene MEG family protein precursor, putative, expressed
LOC_Os04g51310	0.83	0.000836307	putrescine-binding periplasmic protein-related, putative, expressed
LOC_Os10g33680	0.83	0.000836403	serine/threonine-protein phosphatase 2A regulatory subunit B subunitbeta, putative, expressed
LOC_Os03g58940	0.83	0.000836447	LTPL83 - Protease inhibitor/seed storage/LTP family protein precursor, putative, expressed
LOC_Os08g02340	0.83	0.000836585	60S acidic ribosomal protein, putative, expressed
LOC_Os04g39770	0.83	0.000838599	expressed protein
LOC_Os09g37310	0.83	0.00084039	retrotransposon protein, putative, unclassified, expressed
LOC_Os05g42190	0.83	0.000840414	NADPH-dependent FMN reductase domain containing protein, expressed
LOC_Os03g18350	0.83	0.000840667	importin subunit beta, putative, expressed
LOC_Os10g35550	0.83	0.00084403	pre-mRNA-processing factor 6, putative, expressed
LOC_Os02g33140	0.829	0.000845901	ribosomal protein, putative, expressed
LOC_Os01g52390	0.829	0.000846997	plasminogen activator inhibitor 1 RNA-binding protein, putative, expressed
LOC_Os12g07260	0.829	0.000848457	PPR repeat domain containing protein, putative, expressed
LOC_Os11g33110	0.829	0.00085196	Cupin domain containing protein, expressed
LOC_Os08g02550	0.829	0.000852169	proteasome subunit, putative, expressed
LOC_Os02g09910	0.829	0.000852502	PHD-finger domain containing protein, putative, expressed
LOC_Os07g05580	0.829	0.000855793	ribosomal protein L7Ae, putative, expressed
LOC_Os04g32250	0.829	0.000857417	expressed protein
LOC_Os03g12310	0.829	0.000857622	retrotransposon protein, putative, unclassified, expressed
LOC_Os03g08810	0.829	0.000857846	expressed protein
LOC_Os08g01120	0.829	0.000858121	sulfate transporter, putative, expressed
LOC_Os08g42980	0.829	0.000858414	la domain containing protein, expressed
LOC_Os05g08770	0.829	0.000858552	uncharacterized protein At4g06744 precursor, putative, expressed
LOC_Os04g55040	0.829	0.000861218	vacuolar ATP synthase subunit D 1, putative, expressed
LOC_Os04g56700	0.829	0.000863254	naringenin,2-oxoglutarate 3-dioxygenase, putative, expressed
LOC_Os01g57880	0.829	0.000863444	plastocyanin-like domain containing protein, putative, expressed
LOC_Os06g18670	0.829	0.000863547	anthocyanidin 3-O-glucosyltransferase, putative, expressed
LOC_Os12g37980	0.829	0.000869084	protein kinase domain containing protein, expressed
LOC_Os01g33080	0.829	0.000869135	fimbrin-like protein 2, putative, expressed
LOC_Os07g07530	0.828	0.000872965	expressed protein
LOC_Os02g35830	0.828	0.000876078	extracellular ligand-gated ion channel, putative, expressed
LOC_Os07g07770	0.828	0.000876498	ribosomal protein S13p/S18e, putative, expressed
LOC_Os06g44374	0.828	0.000877044	protein transport protein SEC61 subunit gamma, putative, expressed
LOC_Os02g02530	0.828	0.000879574	signal peptide peptidase domain containing protein, expressed
LOC_Os05g51830	0.828	0.000880365	ZOS5-12 - C2H2 zinc finger protein, expressed
LOC_Os03g60870	0.828	0.000881859	ras-related protein, putative, expressed
LOC_Os11g10480	0.828	0.000882811	dehydrogenase, putative, expressed
LOC_Os11g07280	0.828	0.000884512	coatomer subunit beta-1, putative, expressed
LOC_Os04g51630	0.828	0.000886406	60S ribosomal protein L7, putative, expressed
LOC_Os10g32820	0.828	0.00088668	60S ribosomal protein L21-2, putative, expressed
LOC_Os01g51260	0.828	0.000888629	MYB family transcription factor, putative, expressed
LOC_Os08g41810	0.828	0.000891088	ribosomal protein L22, putative, expressed
LOC_Os01g37090	0.828	0.000892393	expressed protein
LOC_Os10g20830	0.827	0.000894302	LTPL133 - Protease inhibitor/seed storage/LTP family protein precursor, expressed
LOC_Os03g28410	0.827	0.000899492	ribosomal protein S2, putative, expressed
LOC_Os01g61020	0.827	0.0008995	curculin-like lectin family protein, putative, expressed
LOC_Os05g50920	0.827	0.000899693	transmembrane amino acid transporter protein, putative, expressed
LOC_Os02g39870	0.827	0.00090033	co-chaperone GrpE protein, putative, expressed
LOC_Os09g36830	0.827	0.000902606	Skp1 family, dimerisation domain containing protein, expressed
LOC_Os03g36780	0.827	0.000903559	elongation factor, putative, expressed
LOC_Os02g49680	0.827	0.000906223	arsenate reductase, putative, expressed
LOC_Os02g25820	0.827	0.00091169	B3 DNA binding domain containing protein, expressed
LOC_Os05g06310	0.827	0.000912507	60S ribosomal protein L18-3, putative, expressed
LOC_Os06g05550	0.827	0.000912967	GDSL-like lipase/acylhydrolase, putative, expressed
LOC_Os06g08140	0.827	0.000915246	protein phosphatase 2C, putative, expressed
LOC_Os06g48720	0.827	0.000917939	cadmium/zinc-transporting ATPase 4, putative, expressed
LOC_Os04g35060	0.826	0.000918166	nicotinate phosphoribosyltransferase family domain containing protein, expressed
LOC_Os09g20820	0.826	0.000920001	enolase, putative, expressed
LOC_Os07g38810	0.826	0.000920152	lectin receptor-type protein kinase, putative, expressed
LOC_Os08g33370	0.826	0.000920236	14-3-3 protein, putative, expressed
LOC_Os11g26710	0.826	0.000921651	MEGL5 - Maternally expressed gene MEG family protein precursor, putative, expressed
LOC_Os07g40700	0.826	0.000923293	RNA methyltransferase, TrmH family protein, putative, expressed
LOC_Os06g22870	0.826	0.000925047	OsIAA21 - Auxin-responsive Aux/IAA gene family member, expressed
LOC_Os05g49410	0.826	0.000925951	expressed protein
LOC_Os05g05830	0.826	0.000926948	bifunctional protein folD, putative, expressed
LOC_Os01g41280	0.826	0.00092816	OsFBD4 - F-box and FBD domain containing protein, expressed
LOC_Os11g04730	0.826	0.000928335	DNA-directed RNA polymerases I, II, and III subunit RPABC1, putative, expressed
LOC_Os04g53770	0.826	0.00092872	SDA1, putative, expressed
LOC_Os05g04570	0.826	0.000928939	F-box family protein, putative, expressed
LOC_Os12g01370	0.826	0.00092978	fatty acid desaturase, putative, expressed
LOC_Os04g47590	0.826	0.000930703	niemann-Pick C1 protein precursor, putative, expressed
LOC_Os03g24940	0.826	0.000939976	proline-rich family protein, putative, expressed
LOC_Os05g36920	0.825	0.000943921	histone deacetylase, putative, expressed
LOC_Os09g37860	0.825	0.000947875	NOL1/NOP2/sun family protein, putative, expressed
LOC_Os01g71210	0.825	0.000947946	expressed protein
LOC_Os05g49180	0.825	0.000948845	protein of unknown function DUF1296 domain containing protein, expressed
LOC_Os11g26850	0.825	0.000949029	erythronate-4-phosphate dehydrogenase, putative, expressed
LOC_Os04g08350	0.825	0.000952827	cysteine synthase, chloroplast/chromoplast precursor, putative, expressed
LOC_Os01g45200	0.825	0.000954052	cinnamoyl-CoA reductase-related, putative, expressed
LOC_Os02g31070	0.825	0.000954231	expressed protein
LOC_Os07g36250	0.825	0.000956612	peptide chain release factor protein, putative, expressed
LOC_Os06g42990	0.825	0.000958952	AP2 domain containing protein, expressed
LOC_Os02g24354	0.825	0.000960876	pyridoxal-dependent decarboxylase protein, putative, expressed
LOC_Os05g09490	0.825	0.000962651	peptidase, T1 family, putative, expressed
LOC_Os11g13694	0.825	0.000962737	AGAP007117-PA, putative, expressed
LOC_Os03g42290	0.825	0.000962986	B3 DNA binding domain containing protein, expressed
LOC_Os05g43550	0.825	0.000963206	Eukaryotic aspartyl protease domain containing protein, expressed
LOC_Os11g29690	0.825	0.000963677	oxidoreductase, 2OG-Fe oxygenase family protein, putative, expressed
LOC_Os01g27730	0.824	0.000969077	GTPase of unknown function domain containing protein, putative, expressed
LOC_Os04g52310	0.824	0.00097352	metal cation transporter, putative, expressed
LOC_Os02g05050	0.824	0.000977308	OsSAUR4 - Auxin-responsive SAUR gene family member, expressed
LOC_Os03g07910	0.824	0.000978573	nitrilase, putative, expressed
LOC_Os08g33440	0.824	0.000980858	2-oxo acid dehydrogenases acyltransferase domain containing protein, expressed
LOC_Os05g29870	0.824	0.000983006	basic salivary proline-rich protein 3 precursor, putative, expressed
LOC_Os01g55549	0.824	0.000985078	homeobox and START domains containing protein, putative, expressed
LOC_Os12g40830	0.824	0.000986308	kinase, pfkB family, putative, expressed
LOC_Os01g57240	0.824	0.000988638	expressed protein
LOC_Os01g37480	0.824	0.000988906	expressed protein
LOC_Os02g39030	0.824	0.000988971	transmembrane protein 17, putative, expressed
LOC_Os07g42420	0.824	0.000989783	3-oxoacyl-synthase, putative, expressed
LOC_Os03g51080	0.824	0.000991026	glutamate decarboxylase, putative, expressed
LOC_Os02g47130	0.824	0.000994088	expressed protein
LOC_Os12g09280	0.824	0.000994187	RNA polymerase subunit, putative, expressed
LOC_Os02g55940	0.823	0.000996942	ribosomal protein S15 containing protein, expressed
LOC_Os03g59380	0.823	0.000999907	LTPL28 - Protease inhibitor/seed storage/LTP family protein precursor, expressed
LOC_Os06g34780	0.823	0.0010001	expressed protein
LOC_Os04g45070	0.823	0.00100313	remorin, putative, expressed
LOC_Os08g23360	0.823	0.00100594	signal recognition particle 68 kDa protein, putative, expressed
LOC_Os11g11390	0.823	0.00100624	ribosomal protein, putative, expressed
LOC_Os09g08720	0.823	0.00100697	cinnamoyl CoA reductase, putative, expressed
LOC_Os02g55590	0.823	0.00100778	expressed protein
LOC_Os04g06340	0.823	0.00100973	MEGL11 - Maternally expressed gene MEG family protein precursor, expressed
LOC_Os05g39960	0.823	0.00101076	40S ribosomal protein S26, putative, expressed
LOC_Os12g16130	0.823	0.00101554	transposon protein, putative, unclassified, expressed
LOC_Os04g20220	0.823	0.00101749	elongation factor Tu, putative, expressed
LOC_Os07g34110	0.823	0.00101846	integral membrane protein DUF6 containing protein, expressed
LOC_Os11g29190	0.822	0.00102155	40S ribosomal protein S5, putative, expressed
LOC_Os02g42430	0.822	0.00102291	GEM, putative, expressed
LOC_Os11g31190	0.822	0.00102418	nodulin MtN3 family protein, putative, expressed
LOC_Os06g19640	0.822	0.00102805	39S ribosomal protein L46, mitochondrial precursor, putative, expressed
LOC_Os01g02930	0.822	0.00102843	glycosyltransferase protein, putative, expressed
LOC_Os08g42050	0.822	0.00102942	emp24/gp25L/p24 family protein, putative, expressed
LOC_Os10g03870	0.822	0.0010355	OsFBX353 - F-box domain containing protein, expressed
LOC_Os02g53830	0.822	0.00103632	MTD1, putative, expressed
LOC_Os05g30880	0.822	0.00103666	nucleolar matrix protein-related, putative, expressed
LOC_Os02g08140	0.822	0.0010393	CAMK_KIN1/SNF1/Nim1_like.14 - CAMK includes calcium/calmodulin depedent protein kinases, expressed
LOC_Os06g49505	0.822	0.00104017	arogenate dehydrogenase 1, chloroplast precursor, putative, expressed
LOC_Os01g67590	0.822	0.0010435	oligopeptidase, putative, expressed
LOC_Os06g27800	0.822	0.00104364	tm-1GCR237 protein, putative, expressed
LOC_Os02g30310	0.822	0.00104563	ThiF family domain containing protein, putative, expressed
LOC_Os05g46620	0.822	0.00104632	chaperone protein dnaJ 10, putative, expressed
LOC_Os08g04700	0.822	0.0010467	expressed protein
LOC_Os02g48360	0.822	0.00104744	pyrophosphate--fructose 6-phosphate 1-phosphotransferase subunit alpha, putative, expressed
LOC_Os12g31660	0.821	0.00104961	transposon protein, putative, CACTA, En/Spm sub-class, expressed
LOC_Os01g53990	0.821	0.00105158	pectinesterase, putative, expressed
LOC_Os02g57854	0.821	0.00105714	vacuolar ATP synthase subunit F, putative, expressed
LOC_Os09g20900	0.821	0.00105778	hypoxia-responsive family protein, putative, expressed
LOC_Os10g34180	0.821	0.00105872	transcription factor BTF3, putative, expressed
LOC_Os03g18700	0.821	0.00106483	expressed protein
LOC_Os06g07860	0.821	0.00106697	cystathionine gamma-synthase, putative, expressed
LOC_Os01g58600	0.821	0.00107092	expressed protein
LOC_Os01g05010	0.821	0.00107099	mitochondrial glycoprotein, putative, expressed
LOC_Os08g21350	0.821	0.00107149	cig3, putative, expressed
LOC_Os05g45320	0.821	0.00107169	ubiquitin domain-containing protein 1, putative, expressed
LOC_Os01g37910	0.821	0.0010743	vacuolar-processing enzyme precursor, putative, expressed
LOC_Os02g11060	0.821	0.00107495	WD domain, G-beta repeat domain containing protein, expressed
LOC_Os04g58010	0.821	0.00107551	B3 DNA binding domain containing protein, expressed
LOC_Os01g47130	0.82	0.00107829	expressed protein
LOC_Os06g19444	0.82	0.00107959	CCT/B-box zinc finger protein, putative, expressed
LOC_Os05g23130	0.82	0.00108114	expressed protein
LOC_Os03g63410	0.82	0.001082	elongation factor Tu, putative, expressed
LOC_Os02g11780	0.82	0.00108329	transcription factor S-II, central domain containing protein, expressed
LOC_Os03g63710	0.82	0.00108373	GTPase-activating protein, putative, expressed
LOC_Os02g05120	0.82	0.00108682	expressed protein
LOC_Os11g12410	0.82	0.0010881	serpin domain containing protein, putative, expressed
LOC_Os02g54160	0.82	0.00108811	AP2 domain containing protein, expressed
LOC_Os06g23570	0.82	0.00109022	expressed protein
LOC_Os03g25350	0.82	0.00109176	LTPL36 - Protease inhibitor/seed storage/LTP family protein precursor, expressed
LOC_Os05g51180	0.82	0.0010928	hyaluronan/mRNA binding family domain containing protein, expressed
LOC_Os10g39440	0.82	0.00109542	transporter family protein, putative, expressed
LOC_Os02g10320	0.82	0.00109843	3-oxoacyl-synthase, putative, expressed
LOC_Os07g25440	0.82	0.00109847	WD domain, G-beta repeat domain containing protein, expressed
LOC_Os03g64080	0.82	0.00109885	retrotransposon protein, putative, Ty1-copia subclass, expressed
LOC_Os07g36940	0.82	0.00110272	eukaryotic translation initiation factor 4G, putative, expressed
LOC_Os03g38990	0.819	0.00110512	DNA-binding protein, putative, expressed
LOC_Os02g32120	0.819	0.00110617	cytochrome b-c1 complex subunit Rieske, mitochondrial precursor, putative, expressed
LOC_Os09g35600	0.819	0.00110777	MATE domain containing protein, expressed
LOC_Os03g30430	0.819	0.00110988	nitrilase-associated protein, putative, expressed
LOC_Os05g40420	0.819	0.00111122	2,3-bisphosphoglycerate-independent phosphoglycerate mutase, putative, expressed
LOC_Os04g38740	0.819	0.00111149	MYB family transcription factor, putative, expressed
LOC_Os06g05890	0.819	0.00111152	B-box zinc finger family protein, putative, expressed
LOC_Os03g15540	0.819	0.00111464	HEAT repeat family protein, putative, expressed
LOC_Os03g08440	0.819	0.00111549	ribosomal protein S2, putative, expressed
LOC_Os01g22500	0.819	0.00111631	craniofacial development protein 1, putative, expressed
LOC_Os02g46130	0.819	0.00111708	tRNA synthetases class II domain containing protein, expressed
LOC_Os01g37837	0.819	0.00111723	seryl-tRNA synthetase, putative, expressed
LOC_Os05g38610	0.819	0.00111969	clathrin adaptor complex small chain domain containing protein, expressed
LOC_Os02g02275	0.819	0.00112088	expressed protein
LOC_Os01g01060	0.819	0.00112155	40S ribosomal protein S5, putative, expressed
LOC_Os06g43850	0.819	0.00112157	ATP synthase F1, delta subunit family protein, putative, expressed
LOC_Os03g42770	0.819	0.00112471	expressed protein
LOC_Os04g05080	0.819	0.00112541	vacuolar ATP synthase subunit F, putative, expressed
LOC_Os06g40720	0.819	0.00112576	EF hand family protein, putative, expressed
LOC_Os01g43110	0.819	0.00112852	expressed protein
LOC_Os05g47890	0.819	0.00113063	WD domain, G-beta repeat domain containing protein, expressed
LOC_Os02g13950	0.819	0.00113123	NHL repeat-containing protein, putative, expressed
LOC_Os07g39870	0.818	0.00113382	eukaryotic peptide chain release factor subunit 1-1, putative, expressed
LOC_Os02g09320	0.818	0.00113395	cytochrome P450, putative, expressed
LOC_Os05g07850	0.818	0.00113473	receptor-like kinase, putative, expressed
LOC_Os06g16390	0.818	0.00113607	SET domain containing protein, expressed
LOC_Os02g58460	0.818	0.00113625	beta-catenin-like protein 1, putative, expressed
LOC_Os01g07382	0.818	0.00113641	expressed protein
LOC_Os03g50480	0.818	0.0011371	phosphoglucomutase, putative, expressed
LOC_Os07g08240	0.818	0.00113944	ZmEBE-1 protein, putative, expressed
LOC_Os10g26130	0.818	0.00114011	phenylalanyl-tRNA synthetase, putative, expressed
LOC_Os03g05730	0.818	0.00114244	cell division control protein 48 homolog E, putative, expressed
LOC_Os03g13970	0.818	0.0011467	26S proteasome non-ATPase regulatory subunit 4, putative, expressed
LOC_Os02g48590	0.818	0.00114932	expressed protein
LOC_Os01g55730	0.818	0.00115054	AGAP003732-PA, putative, expressed
LOC_Os01g58590	0.818	0.00115571	expressed protein
LOC_Os01g23610	0.818	0.00115589	dihydrolipoyl dehydrogenase, putative, expressed
LOC_Os02g36974	0.818	0.00115624	14-3-3 protein, putative, expressed
LOC_Os01g23680	0.818	0.00115648	rossmann fold nucleotide-binding protein involved in DNA uptake, putative, expressed
LOC_Os06g51480	0.818	0.00116091	expressed protein
LOC_Os02g03460	0.818	0.00116185	phosphatidate cytidylyltransferase, putative, expressed
LOC_Os06g49810	0.818	0.00116228	glycosyl transferase family 8, putative, expressed
LOC_Os05g50960	0.818	0.00116262	polygalacturonase, putative, expressed
LOC_Os12g42090	0.817	0.00116554	methyltransferase domain containing protein, putative, expressed
LOC_Os02g55260	0.817	0.00116687	DEAD-box ATP-dependent RNA helicase, putative, expressed
LOC_Os06g14510	0.817	0.00116836	glucose-6-phosphate isomerase, putative, expressed
LOC_Os07g07340	0.817	0.00116877	glucan endo-1,3-beta-glucosidase precursor, putative, expressed
LOC_Os01g16110	0.817	0.00117034	la domain containing protein, putative, expressed
LOC_Os06g05180	0.817	0.00117243	coatomer subunit beta, putative, expressed
LOC_Os05g08990	0.817	0.00117255	glutaminyl-tRNA synthetase, putative, expressed
LOC_Os08g43640	0.817	0.00117297	26S proteasome non-ATPase regulatory subunit 3, putative, expressed
LOC_Os07g41260	0.817	0.00117322	PPR repeat domain containing protein, putative, expressed
LOC_Os03g48140	0.817	0.0011739	myosin, putative, expressed
LOC_Os08g05870	0.817	0.00117558	oxysterol-binding protein-related protein 6, putative, expressed
LOC_Os04g44560	0.817	0.00117585	expressed protein
LOC_Os03g18580	0.817	0.00117624	40S ribosomal protein S7, putative, expressed
LOC_Os02g53330	0.817	0.00117648	1-aminocyclopropane-1-carboxylate deaminase, putative, expressed
LOC_Os08g02120	0.817	0.00117766	kinase, pfkB family, putative, expressed
LOC_Os09g33986	0.817	0.001179	peptidase, T1 family, putative, expressed
LOC_Os02g01960	0.817	0.00118216	tetratricopeptide repeat domain containing protein, expressed
LOC_Os05g33390	0.817	0.00118648	cation-transporting ATPase, putative, expressed
LOC_Os06g06590	0.817	0.00118684	expressed protein
LOC_Os05g42350	0.817	0.00118734	ferredoxin--nitrite reductase, putative, expressed
LOC_Os08g10649	0.817	0.00118831	GTPase of unknown function domain containing protein, putative, expressed
LOC_Os02g11030	0.817	0.00119336	50S ribosomal protein L19, chloroplast precursor, putative, expressed
LOC_Os01g10290	0.816	0.00119407	autophagy-related protein 3, putative, expressed
LOC_Os10g35500	0.816	0.00119445	epoxide hydrolase, putative, expressed
LOC_Os02g08100	0.816	0.00119817	AMP-binding domain containing protein, expressed
LOC_Os07g44640	0.816	0.00120192	ZOS7-13 - C2H2 zinc finger protein, expressed
LOC_Os02g34370	0.816	0.00120294	expressed protein
LOC_Os03g63520	0.816	0.00120393	Der1-like family domain containing protein, expressed
LOC_Os10g42260	0.816	0.00120404	expressed protein
LOC_Os01g42980	0.816	0.00120608	ribosomal protein L22, putative, expressed
LOC_Os12g35350	0.816	0.0012064	kelch repeat protein, putative, expressed
LOC_Os07g02200	0.816	0.00120646	plastocyanin-like domain containing protein, putative, expressed
LOC_Os07g44004	0.816	0.00120694	expressed protein
LOC_Os06g47770	0.816	0.00120978	expressed protein
LOC_Os06g43690	0.816	0.00121205	WD repeat-containing protein, putative, expressed
LOC_Os03g15560	0.816	0.00121483	wibg, putative, expressed
LOC_Os06g34790	0.816	0.00121551	DUF538 domain containing protein, putative, expressed
LOC_Os02g08000	0.816	0.00121691	expressed protein
LOC_Os03g21550	0.816	0.00121848	eukaryotic translation initiation factor 2 subunit beta, putative, expressed
LOC_Os01g41260	0.816	0.00121981	OsFBD2 - F-box and FBD domain containing protein, expressed
LOC_Os09g24690	0.816	0.00122217	60S ribosomal protein L34, putative, expressed
LOC_Os12g18140	0.815	0.00122414	superkiller viralicidic activity 2-like 2, putative, expressed
LOC_Os05g07680	0.815	0.00122595	KIP1, putative, expressed
LOC_Os09g31180	0.815	0.00122642	ribosomal protein L6, putative, expressed
LOC_Os02g17450	0.815	0.00122741	retrotransposon protein, putative, unclassified, expressed
LOC_Os01g42880	0.815	0.00122862	transferase family protein, putative, expressed
LOC_Os03g38260	0.815	0.00122938	60S ribosomal protein L19-3, putative, expressed
LOC_Os05g48320	0.815	0.00123403	60S ribosomal protein L37a, putative, expressed
LOC_Os08g45040	0.815	0.00123638	zinc finger protein 593, putative, expressed
LOC_Os06g43760	0.815	0.00123898	tRNA synthetase class I, putative, expressed
LOC_Os09g07820	0.815	0.00123971	exosome complex exonuclease, putative, expressed
LOC_Os08g03640	0.815	0.0012414	60S acidic ribosomal protein P0, putative, expressed
LOC_Os02g52340	0.815	0.00124166	OsMADS22 - MADS-box family gene with MIKCc type-box, expressed
LOC_Os03g07570	0.815	0.00124295	aminotransferase, putative, expressed
LOC_Os04g56080	0.815	0.00124299	S-locus-like receptor protein kinase, putative, expressed
LOC_Os02g40490	0.815	0.00124343	expressed protein
LOC_Os01g73140	0.815	0.00124527	ubiquitin-fold modifier 1 precursor, putative, expressed
LOC_Os12g04290	0.815	0.00125035	PP2A regulatory subunit TAP46, putative, expressed
LOC_Os01g24680	0.815	0.00125394	3-hydroxyacyl-CoA dehydrogenase, putative, expressed
LOC_Os04g42380	0.814	0.00125534	ribosomal protein S17, putative, expressed
LOC_Os01g10350	0.814	0.00125759	MPPN domain containing protein, expressed
LOC_Os09g37100	0.814	0.00126003	phospholipase D, putative, expressed
LOC_Os06g36770	0.814	0.00126254	serine/threonine protein phosphatase 2A 55 kDa regulatory subunit B, putative, expressed
LOC_Os07g48430	0.814	0.00126292	nucleoside-triphosphatase, putative, expressed
LOC_Os04g44280	0.814	0.00126397	OsRR5 type-A response regulator, expressed
LOC_Os04g21600	0.814	0.0012641	expressed protein
LOC_Os07g34620	0.814	0.00126629	expressed protein
LOC_Os01g69160	0.814	0.00126761	regulatory protein, putative, expressed
LOC_Os02g45250	0.814	0.00127138	homeobox and START domains containing protein, putative, expressed
LOC_Os01g52970	0.814	0.00127145	OsFBX22 - F-box domain containing protein, expressed
LOC_Os06g37440	0.814	0.00127874	elongation factor 1-gamma, putative, expressed
LOC_Os02g14860	0.814	0.00127918	prefoldin subunit, putative, expressed
LOC_Os03g50885	0.814	0.00128136	actin, putative, expressed
LOC_Os06g34660	0.814	0.00128327	X8 domain containing protein, expressed
LOC_Os08g04290	0.814	0.00128485	WD domain, G-beta repeat domain containing protein, expressed
LOC_Os10g32970	0.814	0.00128516	eukaryotic translation initiation factor, putative, expressed
LOC_Os02g57570	0.814	0.00128608	MATE efflux family protein, putative, expressed
LOC_Os07g40800	0.813	0.00128725	PPR repeat domain containing protein, putative, expressed
LOC_Os05g14194	0.813	0.0012881	glyoxalase family protein, putative, expressed
LOC_Os08g01570	0.813	0.00129056	retrotransposon protein, putative, unclassified, expressed
LOC_Os10g42750	0.813	0.00129752	CSLD1 - cellulose synthase-like family D, expressed
LOC_Os02g30460	0.813	0.00129911	uncharacterized protein MJ0304, putative, expressed
LOC_Os02g57450	0.813	0.00130237	Ser/Thr protein phosphatase family protein, putative, expressed
LOC_Os03g15033	0.813	0.00130429	expressed protein
LOC_Os06g06560	0.813	0.00130466	starch synthase, putative, expressed
LOC_Os10g10244	0.813	0.00130467	alanyl-tRNA synthetase, putative, expressed
LOC_Os05g29990	0.813	0.00130487	NAD dependent epimerase/dehydratase family domain containing protein, expressed
LOC_Os01g16540	0.813	0.00131278	NEDD8-activating enzyme E1 catalytic subunit, putative, expressed
LOC_Os04g42010	0.813	0.00131497	RNA binding protein, putative, expressed
LOC_Os01g29690	0.813	0.00131517	expressed protein
LOC_Os01g16010	0.813	0.00131567	BCAS2 protein, putative, expressed
LOC_Os10g02220	0.813	0.0013176	peptide transporter PTR2, putative, expressed
LOC_Os02g58070	0.812	0.00132123	oxidoreductase, putative, expressed
LOC_Os08g14900	0.812	0.00132151	expressed protein
LOC_Os10g08450	0.812	0.00132155	transposon protein, putative, CACTA, En/Spm sub-class, expressed
LOC_Os04g35180	0.812	0.00132316	co-chaperone GrpE protein, putative, expressed
LOC_Os04g56540	0.812	0.00132647	expressed protein
LOC_Os11g37640	0.812	0.00133036	ADP-ribosylation factor, putative, expressed
LOC_Os02g27960	0.812	0.00133163	expressed protein
LOC_Os03g38000	0.812	0.00133369	40S ribosomal protein S3-1, putative, expressed
LOC_Os01g53000	0.812	0.00134409	trehalose synthase, putative, expressed
LOC_Os10g37660	0.812	0.00134815	trehalase precursor, putative, expressed
LOC_Os05g48510	0.812	0.00134903	phenylalanyl-tRNA synthetase beta chain, putative, expressed
LOC_Os08g04190	0.812	0.00135218	homeobox and START domains containing protein, putative, expressed
LOC_Os07g03160	0.811	0.00135302	WD domain, G-beta repeat domain containing protein, expressed
LOC_Os07g08160	0.811	0.00136085	early light-induced protein, chloroplast precursor, putative, expressed
LOC_Os09g36040	0.811	0.00136358	rhodanese-like domain containing protein, putative, expressed
LOC_Os03g22460	0.811	0.00136631	expressed protein
LOC_Os08g06480	0.811	0.00136845	lissencephaly type-1-like homology motif, putative, expressed
LOC_Os02g01280	0.811	0.00137345	T-complex protein, putative, expressed
LOC_Os05g24601	0.811	0.00137704	coatomer subunit delta, putative, expressed
LOC_Os09g31120	0.811	0.00137832	pirin, putative, expressed
LOC_Os03g27260	0.811	0.00137936	40S ribosomal protein S6, putative, expressed
LOC_Os06g16290	0.811	0.00138052	ribosomal protein L7Ae, putative, expressed
LOC_Os03g58800	0.811	0.0013811	ATPase, putative, expressed
LOC_Os01g53930	0.81	0.00139298	hexokinase, putative, expressed
LOC_Os11g29400	0.81	0.00139414	6-phosphogluconate dehydrogenase, decarboxylating, putative, expressed
LOC_Os02g01900	0.81	0.00139534	expressed protein
LOC_Os02g06430	0.81	0.00139616	DUF292 domain containing protein, expressed
LOC_Os06g22100	0.81	0.00139649	DNA binding protein, putative, expressed
LOC_Os01g17402	0.81	0.00139699	cyclin, putative, expressed
LOC_Os01g15110	0.81	0.00139807	syntaxin, putative, expressed
LOC_Os06g05090	0.81	0.00140323	methyltransferase domain containing protein, expressed
LOC_Os01g10480	0.81	0.00140824	plastocyanin-like domain containing protein, putative, expressed
LOC_Os02g02860	0.81	0.00141097	glutamyl-tRNA synthetase, putative, expressed
LOC_Os11g09040	0.81	0.00141111	expressed protein
LOC_Os07g49150	0.81	0.00141182	26S protease regulatory subunit 4, putative, expressed
LOC_Os03g04750	0.81	0.00141484	60S ribosomal protein L21-2, putative, expressed
LOC_Os07g10720	0.81	0.00141589	40S ribosomal protein S15a, putative, expressed
LOC_Os06g45120	0.81	0.00141753	ATP synthase, putative, expressed
LOC_Os10g34670	0.81	0.00141867	prefoldin, putative, expressed
LOC_Os12g37419	0.81	0.00141916	cytochrome c oxidase polypeptide Vc, putative, expressed
LOC_Os11g04990	0.81	0.00142088	expressed protein
LOC_Os05g01250	0.809	0.00142201	SNF7 domain containing protein, putative, expressed
LOC_Os11g05760	0.809	0.0014221	OsProCP5 - Putative Lysosomal Pro-x Carboxypeptidase homologue, expressed
LOC_Os03g58700	0.809	0.0014251	vacuolar protein sorting-associated protein 35, putative, expressed
LOC_Os11g34120	0.809	0.00142522	exportin 1, putative, expressed
LOC_Os01g71490	0.809	0.00143115	expressed protein
LOC_Os07g44070	0.809	0.0014321	pectinacetylesterase domain containing protein, expressed
LOC_Os02g27470	0.809	0.00143573	importin-7, putative, expressed
LOC_Os02g37862	0.809	0.00143779	60S ribosomal protein L6, putative, expressed
LOC_Os02g37870	0.809	0.00143868	Brix domain containing protein, putative, expressed
LOC_Os02g36300	0.809	0.00143889	zinc finger, C3HC4 type domain containing protein, expressed
LOC_Os05g06270	0.809	0.00144112	zinc finger, C3HC4 type domain containing protein, expressed
LOC_Os09g23160	0.809	0.00144266	annexin, putative, expressed
LOC_Os08g44540	0.809	0.00144335	expressed protein
LOC_Os06g29120	0.809	0.00144633	STE_PAK_Ste20_STLK.5 - STE kinases include homologs to sterile 7, sterile 11 and sterile 20 from yeast, expressed
LOC_Os06g47330	0.809	0.00144704	dynamin family protein, putative, expressed
LOC_Os10g41960	0.809	0.00144932	eukaryotic translation initiation factor 3 subunit B, putative, expressed
LOC_Os03g60620	0.809	0.00145031	DnaK family protein, putative, expressed
LOC_Os07g41790	0.809	0.00145502	LSM domain containing protein, expressed
LOC_Os05g08580	0.809	0.00145579	hypothetical protein
LOC_Os06g35814	0.808	0.00146018	ras-related protein, putative, expressed
LOC_Os05g07626	0.808	0.00146345	expressed protein
LOC_Os06g06250	0.808	0.00146509	GDSL-like lipase/acylhydrolase, putative, expressed
LOC_Os05g34180	0.808	0.00146524	hydrolase, NUDIX family, domain containing protein, expressed
LOC_Os12g23980	0.808	0.00146728	OsSub63 - Putative Subtilisin homologue, expressed
LOC_Os04g01300	0.808	0.00146873	OsRhmbd10 - Putative Rhomboid homologue, expressed
LOC_Os02g22780	0.808	0.00147285	T-complex protein, putative, expressed
LOC_Os12g13460	0.808	0.00147755	SET domain-containing protein, putative, expressed
LOC_Os02g40880	0.808	0.00147784	ribosomal protein L14, putative, expressed
LOC_Os09g12660	0.808	0.00147915	glucose-1-phosphate adenylyltransferase large subunit, chloroplast precursor, putative, expressed
LOC_Os09g20660	0.808	0.00147944	UPF0041 domain containing protein, putative, expressed
LOC_Os10g22380	0.808	0.00148287	glutamyl-tRNA synthetase, cytoplasmic, putative, expressed
LOC_Os07g01600	0.808	0.00148353	dirigent, putative, expressed
LOC_Os06g05660	0.808	0.00148372	NAP domain containing protein, putative, expressed
LOC_Os05g46580	0.808	0.00148379	polyprenyl synthetase, putative, expressed
LOC_Os02g09170	0.808	0.0014866	sucrose-phosphate synthase, putative, expressed
LOC_Os08g44370	0.807	0.00149247	inosine-uridine preferring nucleoside hydrolase family protein, putative, expressed
LOC_Os11g03794	0.807	0.00149494	WD domain, G-beta repeat domain containing protein, expressed
LOC_Os07g12720	0.807	0.00149551	expressed protein
LOC_Os11g06070	0.807	0.00149655	expressed protein
LOC_Os06g35960	0.807	0.00150312	HSF-type DNA-binding domain containing protein, expressed
LOC_Os08g44480	0.807	0.00150374	40S ribosomal protein S25, putative, expressed
LOC_Os04g42130	0.807	0.00150802	integral membrane transporter family protein, putative, expressed
LOC_Os02g06690	0.807	0.00151016	plastocyanin-like domain containing protein, putative, expressed
LOC_Os12g41930	0.807	0.00151038	SRP40, C-terminal domain containing protein, expressed
LOC_Os11g42930	0.807	0.00151124	expressed protein
LOC_Os10g41150	0.807	0.00151723	aminotransferase, classes I and II, domain containing protein, expressed
LOC_Os08g04390	0.807	0.00151942	basic helix-loop-helix DND-binding domain containing protein, expressed
LOC_Os11g04070	0.807	0.00152031	60S acidic ribosomal protein P0, putative, expressed
LOC_Os10g42320	0.807	0.00152063	nonsense-mediated mRNA decay protein 3, putative, expressed
LOC_Os05g45270	0.807	0.00152105	ribosomal L9, putative, expressed
LOC_Os08g27870	0.807	0.00152298	EARLY flowering protein, putative, expressed
LOC_Os02g04660	0.807	0.00152474	arginine N-methyltransferase 5, putative, expressed
LOC_Os02g03270	0.807	0.00152588	AT hook motif domain containing protein, expressed
LOC_Os07g20580	0.807	0.00152819	DEAD-box ATP-dependent RNA helicase, putative, expressed
LOC_Os01g41030	0.806	0.00152934	ribosomal protein L25, putative, expressed
LOC_Os03g08980	0.806	0.00153372	expressed protein
LOC_Os05g48030	0.806	0.00153462	anti-silencing protein, ASF1-like domain containing protein, expressed
LOC_Os05g06770	0.806	0.00153573	40S ribosomal protein S27a, putative, expressed
LOC_Os05g41180	0.806	0.00153573	peptidase, T1 family, putative, expressed
LOC_Os08g02410	0.806	0.00154322	40S ribosomal protein S13, putative, expressed
LOC_Os03g12300	0.806	0.00154444	HEAT repeat family protein, putative, expressed
LOC_Os07g47780	0.806	0.0015493	60S ribosomal protein L18-3, putative, expressed
LOC_Os08g45160	0.806	0.00154961	TENA/THI-4 family protein, putative, expressed
LOC_Os09g25770	0.806	0.00155367	auxin-induced protein 5NG4, putative, expressed
LOC_Os03g06980	0.806	0.00155464	nucleic acid binding protein, putative, expressed
LOC_Os02g52480	0.806	0.00155531	cyclin-dependent kinase inhibitor, putative, expressed
LOC_Os01g15970	0.806	0.00155792	expressed protein
LOC_Os06g50154	0.806	0.00155799	translocon-associated protein subunit alpha precursor, putative, expressed
LOC_Os07g18610	0.806	0.00155883	OsFBLD7 - F-box, LRR and FBD domain containing protein, expressed
LOC_Os01g60410	0.806	0.00156459	ubiquitin-conjugating enzyme, putative, expressed
LOC_Os03g18510	0.806	0.0015651	expressed protein
LOC_Os01g62350	0.805	0.00156844	60S ribosomal protein L36-2, putative, expressed
LOC_Os01g52490	0.805	0.00157031	40S ribosomal protein S24, putative, expressed
LOC_Os02g56000	0.805	0.00157062	26S protease regulatory subunit 6A, putative, expressed
LOC_Os03g18830	0.805	0.00157408	programmed cell death protein 2, putative, expressed
LOC_Os08g28170	0.805	0.00157468	nucleobase-ascorbate transporter, putative, expressed
LOC_Os06g48030	0.805	0.00157508	peroxidase precursor, putative, expressed
LOC_Os05g40790	0.805	0.00157511	CCR4-NOT transcription factor, putative, expressed
LOC_Os06g12990	0.805	0.00158106	tRNA methyltransferase, putative, expressed
LOC_Os07g29320	0.805	0.00158685	rRNA-processing protein EBP2, putative, expressed
LOC_Os12g18960	0.805	0.00159155	integral membrane protein DUF6 containing protein, expressed
LOC_Os11g06240	0.805	0.00159724	ATOZI1, putative, expressed
LOC_Os05g44050	0.805	0.00159835	ras-related protein, putative, expressed
LOC_Os11g10780	0.805	0.00159932	expressed protein
LOC_Os01g09760	0.805	0.00160179	DIRP family protein, putative, expressed
LOC_Os02g06700	0.804	0.00160592	ribosomal protein, putative, expressed
LOC_Os02g03890	0.804	0.00160797	nuclear transport factor 2, putative, expressed
LOC_Os08g04660	0.804	0.00161043	expressed protein
LOC_Os01g49810	0.804	0.00161371	expressed protein
LOC_Os02g53060	0.804	0.00161874	peptidase, T1 family, putative, expressed
LOC_Os06g12780	0.804	0.00161949	OsDegp10 - Putative Deg protease homologue, expressed
LOC_Os12g07300	0.804	0.00162072	N-acetyltransferase 10, putative, expressed
LOC_Os05g48450	0.804	0.00162146	aminotransferase domain containing protein, putative, expressed
LOC_Os06g09020	0.804	0.00162472	expressed protein
LOC_Os02g09300	0.804	0.00162625	hypothetical protein
LOC_Os07g47700	0.804	0.0016263	NAD dependent epimerase/dehydratase family domain containing protein, expressed
LOC_Os03g58430	0.804	0.00162666	40S ribosomal protein S15, putative, expressed
LOC_Os03g09110	0.804	0.00162934	mitochondrial carrier protein, putative, expressed
LOC_Os12g25710	0.804	0.0016346	bifunctional aminoacyl-tRNA synthetase, putative, expressed
LOC_Os04g32190	0.803	0.0016419	expressed protein
LOC_Os03g22320	0.803	0.00164329	utp14 protein, putative, expressed
LOC_Os03g31134	0.803	0.00164658	retrotransposon protein, putative, Ty1-copia subclass, expressed
LOC_Os04g59494	0.803	0.00164798	transportin-2, putative, expressed
LOC_Os04g34100	0.803	0.00164824	expressed protein
LOC_Os03g17910	0.803	0.00164839	kinesin like protein, putative, expressed
LOC_Os04g47830	0.803	0.0016486	SNF2 family N-terminal domain containing protein, expressed
LOC_Os04g27860	0.803	0.0016495	40S ribosomal protein S27, putative, expressed
LOC_Os12g25130	0.803	0.00165047	CRP8 - Cysteine-rich family protein precursor, expressed
LOC_Os07g12830	0.803	0.00165051	cytochrome b5-like Heme/Steroid binding domain containing protein, expressed
LOC_Os07g38460	0.803	0.00165148	expressed protein
LOC_Os03g21060	0.803	0.00165153	No apical meristem protein, putative, expressed
LOC_Os05g25920	0.803	0.00165816	expressed protein
LOC_Os06g49890	0.803	0.0016621	coiled-coil domain-containing protein 90A, mitochondrial precursor, putative, expressed
LOC_Os08g06420	0.803	0.0016626	abhydrolase domain-containing protein FAM108C1, putative, expressed
LOC_Os04g49130	0.803	0.00166349	ubiquitin-conjugating enzyme, putative, expressed
LOC_Os03g50090	0.803	0.00166367	transposon protein, putative, CACTA, En/Spm sub-class, expressed
LOC_Os06g12330	0.803	0.00166464	amino acid transporter, putative, expressed
LOC_Os02g38840	0.803	0.00166619	glucose-6-phosphate 1-dehydrogenase, cytoplasmic isoform, putative, expressed
LOC_Os11g21990	0.803	0.0016667	expressed protein
LOC_Os06g40110	0.803	0.00166904	RNA polymerase Rpc34 subunit family protein, expressed
LOC_Os05g34170	0.803	0.00167162	tubulin/FtsZ domain containing protein, putative, expressed
LOC_Os02g29920	0.803	0.00167315	transposon protein, putative, CACTA, En/Spm sub-class
LOC_Os09g08430	0.803	0.00167386	ribosomal protein L22, putative, expressed
LOC_Os04g39700	0.803	0.00167703	60S ribosomal protein L6, putative, expressed
LOC_Os02g56510	0.802	0.00168166	phosphate transporter 1, putative, expressed
LOC_Os01g60360	0.802	0.00168547	ubiquitin-conjugating enzyme, putative, expressed
LOC_Os08g21660	0.802	0.00168679	WD domain, G-beta repeat domain containing protein, expressed
LOC_Os09g11790	0.802	0.00168855	DEFL14 - Defensin and Defensin-like DEFL family, expressed
LOC_Os05g23740	0.802	0.00169058	DnaK family protein, putative, expressed
LOC_Os02g30100	0.802	0.00169098	cytochrome P450, putative, expressed
LOC_Os01g44394	0.802	0.00169509	mitotic checkpoint protein, putative, expressed
LOC_Os01g06290	0.802	0.00169901	splicing factor, arginine/serine-rich, putative, expressed
LOC_Os04g52320	0.802	0.00170198	QRT3, putative, expressed
LOC_Os05g07600	0.802	0.00170492	expressed protein
LOC_Os01g65520	0.802	0.0017075	Sad1 / UNC-like C-terminal domain containing protein, putative, expressed
LOC_Os07g08660	0.802	0.00171007	40S ribosomal protein S15, putative, expressed
LOC_Os05g28510	0.802	0.00171022	importin subunit beta, putative, expressed
LOC_Os03g04590	0.802	0.001713	ribosomal protein, putative, expressed
LOC_Os09g35670	0.802	0.00171362	expressed protein
LOC_Os01g39780	0.802	0.00171436	expressed protein
LOC_Os01g72800	0.801	0.00172118	signal recognition particle receptor, putative, expressed
LOC_Os01g49290	0.801	0.00172294	WD repeat-containing protein, putative, expressed
LOC_Os08g39820	0.801	0.00172474	pre-rRNA-processing protein TSR2, putative, expressed
LOC_Os12g21500	0.801	0.00172524	exosome complex exonuclease, putative, expressed
LOC_Os02g42406	0.801	0.00173363	DEAD-box ATP-dependent RNA helicase, putative, expressed
LOC_Os03g22420	0.801	0.00173548	AAA-type ATPase family protein, putative, expressed
LOC_Os03g57190	0.801	0.00173707	TCP family transcription factor, putative, expressed
LOC_Os02g06650	0.801	0.00173782	COX VIIa, putative, expressed
LOC_Os05g28750	0.801	0.00173812	60S ribosomal protein L29-2, putative, expressed
LOC_Os12g07450	0.801	0.00173845	WD domain, G-beta repeat domain containing protein, expressed
LOC_Os10g09000	0.801	0.00174133	expressed protein
LOC_Os02g52360	0.801	0.00174449	peptidyl-prolyl cis-trans isomerase CYP40, putative, expressed
LOC_Os02g57180	0.801	0.00174717	NADH dehydrogenase 1 alpha subcomplex subunit 9,mitochondrial precursor, putative, expressed
LOC_Os12g37960	0.801	0.00174723	diaminopimelate epimerase, chloroplast precursor, putative, expressed
LOC_Os03g46570	0.801	0.00174759	protein binding protein, putative, expressed
LOC_Os03g53230	0.801	0.00174816	bifunctional 3-phosphoadenosine 5-phosphosulfate synthetase, putative, expressed
LOC_Os02g09600	0.801	0.00174978	expressed protein
LOC_Os02g12794	0.801	0.00175158	elongation factor 1-gamma, putative, expressed
LOC_Os02g07910	0.801	0.00175211	fiber protein Fb15, putative, expressed
LOC_Os10g03780	0.801	0.00175312	OsFBX351 - F-box domain containing protein, expressed
LOC_Os06g49790	0.801	0.00175459	acyltransferase, putative, expressed
LOC_Os03g02210	0.801	0.00175716	expressed protein
LOC_Os05g47470	0.801	0.00175814	VIP1 protein, putative, expressed
LOC_Os02g57090	0.801	0.00175818	anthranilate phosphoribosyltransferase, putative, expressed
LOC_Os12g25210	0.801	0.00175956	signal peptidase complex subunit 1, putative, expressed
LOC_Os11g04740	0.8	0.00176596	FAD-binding and arabino-lactone oxidase domains containing protein, putative, expressed
LOC_Os07g10660	0.8	0.0017689	ribosomal protein, putative, expressed
LOC_Os02g57540	0.8	0.00177976	60S ribosomal protein L28-1, putative, expressed
LOC_Os01g67420	-0.8	0.00177476	lipase, putative, expressed
LOC_Os06g01720	-0.8	0.00177114	expressed protein
LOC_Os08g06880	-0.8	0.00176552	expressed protein
LOC_Os09g37590	-0.8	0.00176144	OsFBDUF47 - F-box and DUF domain containing protein, expressed
LOC_Os01g26174	-0.801	0.00176103	OsWAK5 - OsWAK receptor-like protein kinase, expressed
LOC_Os01g09030	-0.801	0.00175467	2-aminoethanethiol dioxygenase, putative, expressed
LOC_Os11g30120	-0.801	0.00174115	expressed protein
LOC_Os04g38400	-0.801	0.00173284	ethylene-insensitive 3, putative, expressed
LOC_Os11g13800	-0.801	0.00173197	expressed protein
LOC_Os11g43140	-0.801	0.00173126	expressed protein
LOC_Os05g34780	-0.801	0.00172927	retrotransposon protein, putative, Ty3-gypsy subclass, expressed
LOC_Os01g48874	-0.801	0.00172531	wax synthase, putative, expressed
LOC_Os04g48370	-0.801	0.00172265	RNA polymerase IV subunit, putative, expressed
LOC_Os11g09590	-0.802	0.0017204	OsFBX404 - F-box domain containing protein, expressed
LOC_Os02g12370	-0.802	0.00171838	expressed protein
LOC_Os10g27170	-0.802	0.00171092	calmodulin-binding protein, putative, expressed
LOC_Os04g53640	-0.802	0.00170828	peroxidase precursor, putative, expressed
LOC_Os12g08020	-0.802	0.00170668	expressed protein
LOC_Os07g39290	-0.802	0.0016863	ruvB-like, putative, expressed
LOC_Os02g34840	-0.802	0.00168348	RNA polymerase II transcriptional coactivator KIWI, putative, expressed
LOC_Os04g49180	-0.803	0.00167983	expressed protein
LOC_Os10g29650	-0.803	0.00166454	retrotransposon protein, putative, unclassified, expressed
LOC_Os05g50180	-0.803	0.00166027	OsCML14 - Calmodulin-related calcium sensor protein, expressed
LOC_Os03g07920	-0.803	0.00165653	expressed protein
LOC_Os01g59560	-0.803	0.00165427	protein kinase domain containing protein, expressed
LOC_Os03g13240	-0.803	0.001652	peptide transporter, putative, expressed
LOC_Os01g02290	-0.803	0.00164764	Ser/Thr receptor-like kinase, putative, expressed
LOC_Os04g02370	-0.804	0.00161997	transposon protein, putative, unclassified, expressed
LOC_Os01g61910	-0.804	0.00161283	KIP1, putative, expressed
LOC_Os05g49910	-0.804	0.00160961	expressed protein
LOC_Os05g34240	-0.804	0.00160473	hAT dimerisation domain containing protein, expressed
LOC_Os03g61310	-0.805	0.00160232	receptor-like protein kinase, putative, expressed
LOC_Os11g06180	-0.805	0.0016021	nodulation-signaling pathway 2 protein, putative, expressed
LOC_Os05g37920	-0.805	0.00160157	expressed protein
LOC_Os12g42120	-0.805	0.00160104	PPR repeat containing protein, expressed
LOC_Os01g55950	-0.805	0.00159408	acetamidase, putative, expressed
LOC_Os05g33630	-0.805	0.00159199	inosine-uridine preferring nucleoside hydrolase family protein, putative, expressed
LOC_Os12g19549	-0.805	0.00158903	telomerase reverse transcriptase, putative, expressed
LOC_Os04g37700	-0.805	0.00158346	expressed protein
LOC_Os01g71262	-0.805	0.00157626	expressed protein
LOC_Os02g34760	-0.805	0.00156872	retrotransposon protein, putative, unclassified, expressed
LOC_Os09g26370	-0.805	0.00156619	DUF581 domain containing protein, expressed
LOC_Os08g42440	-0.806	0.0015653	CCT/B-box zinc finger protein, putative, expressed
LOC_Os08g15090	-0.806	0.00156232	diacylglycerol kinase catalytic domain family protein, expressed
LOC_Os05g19470	-0.806	0.0015619	expressed protein
LOC_Os12g13290	-0.806	0.00155496	expressed protein
LOC_Os03g59550	-0.806	0.00154781	RNA recognition motif containing protein, putative, expressed
LOC_Os03g45990	-0.806	0.00154736	expressed protein
LOC_Os05g39070	-0.807	0.00152333	NLI interacting factor-like phosphatase, putative, expressed
LOC_Os04g15600	-0.807	0.00151836	receptor kinase, putative, expressed
LOC_Os01g50780	-0.807	0.00151618	expressed protein
LOC_Os07g38980	-0.807	0.00151333	expressed protein
LOC_Os03g36520	-0.807	0.0015055	retrotransposon, putative, centromere-specific, expressed
LOC_Os04g46780	-0.807	0.00150212	MSP domain containing protein, expressed
LOC_Os02g04230	-0.807	0.00150004	CGMC_MAPKCMGC_2.7 - CGMC includes CDA, MAPK, GSK3, and CLKC kinases, expressed
LOC_Os10g05200	-0.808	0.00148238	OsFBX367 - F-box domain containing protein, expressed
LOC_Os06g46720	-0.808	0.00147209	retrotransposon protein, putative, unclassified, expressed
LOC_Os07g48270	-0.808	0.0014616	helicase conserved C-terminal domain containing protein, expressed
LOC_Os08g38620	-0.809	0.00145605	expressed protein
LOC_Os07g27050	-0.809	0.0014518	expressed protein
LOC_Os11g01450	-0.809	0.00144721	phosphatidate cytidylyltransferase, putative, expressed
LOC_Os03g06210	-0.809	0.00144606	expressed protein
LOC_Os07g35920	-0.809	0.0014387	expressed protein
LOC_Os03g10310	-0.809	0.00143573	expressed protein
LOC_Os10g28240	-0.809	0.00143072	calcium-transporting ATPase, plasma membrane-type, putative, expressed
LOC_Os03g42310	-0.809	0.0014286	expressed protein
LOC_Os02g44970	-0.809	0.00142454	expressed protein
LOC_Os05g03760	-0.809	0.00142402	zinc finger family protein, putative, expressed
LOC_Os01g72130	-0.81	0.00139425	glutathione S-transferase, putative, expressed
LOC_Os11g45930	-0.81	0.00139071	NBS-LRR type disease resistance protein, putative, expressed
LOC_Os04g13170	-0.81	0.00139037	OsFBD10 - F-box and FBD domain containing protein, expressed
LOC_Os02g15980	-0.81	0.00138741	expressed protein
LOC_Os02g46610	-0.81	0.00138687	zinc-binding protein, putative, expressed
LOC_Os12g39970	-0.811	0.00138343	expressed protein
LOC_Os03g10890	-0.811	0.00137468	zinc finger, C3HC4 type domain containing protein, expressed
LOC_Os03g08680	-0.811	0.00137308	pentatricopeptide, putative, expressed
LOC_Os09g38410	-0.811	0.00135931	sialin, putative, expressed
LOC_Os01g11370	-0.812	0.00135206	ATP-dependent RNA helicase, putative, expressed
LOC_Os07g02070	-0.812	0.00133677	retrotransposon protein, putative, Ty3-gypsy subclass
LOC_Os07g01200	-0.812	0.00133537	tetraacyldisaccharide 4-kinase, putative, expressed
LOC_Os10g35760	-0.813	0.00131895	pentatricopeptide, putative, expressed
LOC_Os05g20914	-0.813	0.00131701	expressed protein
LOC_Os02g45490	-0.813	0.00131157	expressed protein
LOC_Os05g46760	-0.813	0.00130523	STE_MEKK_ste11_MAP3K.19 - STE kinases include homologs to sterile 7, sterile 11 and sterile 20 from yeast, expressed
LOC_Os12g18120	-0.813	0.00130141	zinc finger C-x8-C-x5-C-x3-H type family protein, expressed
LOC_Os08g35000	-0.814	0.00127655	ARID/BRIGHT DNA-binding domain containing protein, expressed
LOC_Os03g51090	-0.814	0.00127529	OsFBDUF17 - F-box and DUF domain containing protein, expressed
LOC_Os10g40370	-0.814	0.00126949	expressed protein
LOC_Os09g01600	-0.814	0.00126782	expressed protein
LOC_Os02g25449	-0.814	0.0012664	expressed protein
LOC_Os09g39330	-0.814	0.00126591	retrotransposon protein, putative, unclassified, expressed
LOC_Os02g32580	-0.814	0.00125837	expressed protein
LOC_Os02g46210	-0.815	0.00125256	DUF581 domain containing protein, expressed
LOC_Os01g15130	-0.815	0.00125186	hydrolase, alpha/beta fold family domain containing protein, expressed
LOC_Os07g27310	-0.815	0.00124462	CRAL/TRIO domain containing protein, expressed
LOC_Os02g38790	-0.815	0.00124363	expressed protein
LOC_Os05g39930	-0.815	0.00123967	spotted leaf 11, putative, expressed
LOC_Os05g05810	-0.815	0.00123701	DEAD-box ATP-dependent RNA helicase, putative, expressed
LOC_Os01g04490	-0.816	0.00121923	Ser/Thr protein kinase, putative, expressed
LOC_Os10g34710	-0.816	0.00121693	myosin-2 heavy chain, non muscle, putative, expressed
LOC_Os01g12670	-0.816	0.00120187	expressed protein
LOC_Os12g38040	-0.816	0.00120172	metallothionein family protein, expressed
LOC_Os03g08300	-0.817	0.00118276	glycosyl transferase, group 1 domain containing protein, expressed
LOC_Os07g46080	-0.817	0.00117983	expressed protein
LOC_Os05g45340	-0.817	0.00117167	ATP binding protein, putative, expressed
LOC_Os02g01440	-0.818	0.0011537	nitric oxide synthase 1, putative, expressed
LOC_Os04g01150	-0.818	0.00113526	ELMO/CED-12 family protein, putative, expressed
LOC_Os05g51380	-0.819	0.00112986	expressed protein
LOC_Os05g34790	-0.819	0.00112414	GYF domain containing protein, putative, expressed
LOC_Os02g53380	-0.819	0.00112093	expressed protein
LOC_Os01g05090	-0.82	0.00109389	expressed protein
LOC_Os01g73060	-0.82	0.00109382	expressed protein
LOC_Os06g11650	-0.82	0.0010905	phosphate-induced protein 1 conserved region domain containing protein, expressed
LOC_Os03g51580	-0.82	0.00108978	helix-loop-helix DNA-binding domain containing protein, expressed
LOC_Os09g16510	-0.821	0.00107596	WRKY74, expressed
LOC_Os03g47980	-0.821	0.00106912	expressed protein
LOC_Os12g24790	-0.821	0.00106669	retrotransposon protein, putative, LINE subclass, expressed
LOC_Os04g27850	-0.821	0.00106219	oxidoreductase, putative, expressed
LOC_Os01g38980	-0.822	0.00103637	calmodulin-binding protein, putative, expressed
LOC_Os01g01030	-0.822	0.00102436	monocopper oxidase, putative, expressed
LOC_Os01g03660	-0.823	0.00101813	MYB family transcription factor, putative, expressed
LOC_Os07g08080	-0.823	0.0010024	expressed protein
LOC_Os04g33400	-0.823	0.000996466	OsFBLD2 - F-box, LRR and FBD domain containing protein, expressed
LOC_Os08g04400	-0.825	0.000967349	pentatricopeptide repeat domain containing protein, putative, expressed
LOC_Os08g34040	-0.825	0.000948409	expressed protein
LOC_Os04g50208	-0.825	0.00094695	phosphoenolpyruvate carboxykinase, putative, expressed
LOC_Os10g12330	-0.826	0.000941404	retrotransposon protein, putative, unclassified, expressed
LOC_Os02g04860	-0.826	0.000937846	expressed protein
LOC_Os04g40390	-0.826	0.00092959	expressed protein
LOC_Os07g04490	-0.826	0.000926174	expressed protein
LOC_Os02g50220	-0.826	0.000920846	expressed protein
LOC_Os02g34700	-0.827	0.000912317	expressed protein
LOC_Os03g60930	-0.827	0.000895956	RNA recognition motif containing protein, putative, expressed
LOC_Os03g01200	-0.828	0.000883962	SNF2 family N-terminal domain containing protein, expressed
LOC_Os06g35850	-0.828	0.000876983	lectin protein kinase family protein, putative, expressed
LOC_Os06g10420	-0.829	0.000847515	nitrilase, putative, expressed
LOC_Os01g51890	-0.83	0.000845277	endonuclease/exonuclease/phosphatase family domain containing protein, expressed
LOC_Os01g52810	-0.83	0.000839579	expressed protein
LOC_Os07g35600	-0.83	0.000836435	expressed protein
LOC_Os02g32540	-0.83	0.000834068	ubiquitin carboxyl-terminal hydrolase, family 1, putative, expressed
LOC_Os06g13070	-0.83	0.000830715	hhH-GPD superfamily base excision DNA repair protein, putative, expressed
LOC_Os03g30150	-0.83	0.000824732	expressed protein
LOC_Os07g48720	-0.83	0.0008236	MAG2, putative, expressed
LOC_Os11g38330	-0.831	0.000817857	ZOS11-06 - C2H2 zinc finger protein, expressed
LOC_Os03g03900	-0.831	0.000808814	NIN, putative, expressed
LOC_Os03g31690	-0.831	0.000808204	GCN5-related N-acetyltransferase, putative, expressed
LOC_Os06g11780	-0.831	0.000805134	MYB family transcription factor, putative, expressed
LOC_Os08g35050	-0.832	0.000784945	ARID/BRIGHT DNA-binding domain containing protein, expressed
LOC_Os01g05600	-0.833	0.000776644	NBS-LRR disease resistance protein, putative, expressed
LOC_Os01g73644	-0.833	0.000773156	expressed protein
LOC_Os07g01770	-0.833	0.000769398	expressed protein
LOC_Os03g04300	-0.833	0.00076708	ankyrin repeat domain containing protein, expressed
LOC_Os02g23823	-0.833	0.000766402	helix-loop-helix DNA-binding domain containing protein, expressed
LOC_Os01g50050	-0.833	0.000764222	polyprenyl synthetase, putative, expressed
LOC_Os10g41130	-0.833	0.00075859	AP2 domain containing protein, expressed
LOC_Os03g22450	-0.833	0.000758111	auxin response factor 75, putative, expressed
LOC_Os05g30350	-0.834	0.000755885	Os5bglu22 - beta-glucosidase homologue, similar to G. max isohydroxyurate hydrolase, expressed
LOC_Os01g56220	-0.834	0.000753273	expressed protein
LOC_Os03g24060	-0.834	0.000747771	tetratricopeptide repeat containing protein, putative, expressed
LOC_Os04g26834	-0.835	0.000728449	eukaryotic aspartyl protease domain containing protein, expressed
LOC_Os06g40790	-0.835	0.000727866	MLO domain containing protein, putative, expressed
LOC_Os07g48750	-0.835	0.000724184	alpha-N-arabinofuranosidase, putative, expressed
LOC_Os11g44560	-0.835	0.000719094	protein kinase domain containing protein, expressed
LOC_Os01g64930	-0.836	0.000711978	expressed protein
LOC_Os10g34795	-0.836	0.000698898	expressed protein
LOC_Os01g49730	-0.836	0.000695266	expressed protein
LOC_Os05g50310	-0.837	0.000685269	ZF-HD protein dimerisation region containing protein, expressed
LOC_Os01g58790	-0.837	0.000683734	GHMP kinases ATP-binding protein, putative, expressed
LOC_Os07g48260	-0.838	0.000672554	WRKY47, expressed
LOC_Os11g41170	-0.838	0.000672394	disease resistance protein RPM1, putative, expressed
LOC_Os02g37830	-0.838	0.000670999	protein kinase domain containing protein, expressed
LOC_Os01g08710	-0.838	0.000664715	WRKY102, expressed
LOC_Os08g39210	-0.839	0.000649501	OsWAK74 - OsWAK receptor-like protein kinase, expressed
LOC_Os11g13860	-0.839	0.00064676	cyclin-dependent kinase, putative, expressed
LOC_Os03g30890	-0.839	0.000643718	S-locus-like receptor protein kinase, putative, expressed
LOC_Os02g52160	-0.84	0.000627239	LMBR1 integral membrane protein, putative, expressed
LOC_Os09g26160	-0.84	0.000625988	glutamate receptor, putative, expressed
LOC_Os03g19090	-0.84	0.000624979	expressed protein
LOC_Os03g34280	-0.84	0.000620595	expressed protein
LOC_Os02g08330	-0.84	0.000618282	gp176, putative, expressed
LOC_Os01g34930	-0.841	0.000613601	callose synthase, putative, expressed
LOC_Os04g31900	-0.841	0.000602471	calmodulin-binding transcription activator 4, putative, expressed
LOC_Os04g37880	-0.841	0.0006016	expressed protein
LOC_Os09g38660	-0.842	0.000593056	expressed protein
LOC_Os12g14699	-0.842	0.000592659	protein kinase domain containing protein, expressed
LOC_Os07g33550	-0.843	0.000572803	cytochrome P450, putative, expressed
LOC_Os01g16810	-0.843	0.000567683	MYB family transcription factor, putative, expressed
LOC_Os02g09100	-0.844	0.000563735	isoleucyl-tRNA synthetase, cytoplasmic, putative, expressed
LOC_Os05g37880	-0.845	0.000545807	growth regulator related protein, putative, expressed
LOC_Os03g26360	-0.845	0.000542173	expressed protein
LOC_Os10g38580	-0.845	0.000541971	glutathione S-transferase, putative, expressed
LOC_Os08g24930	-0.845	0.000541064	expressed protein
LOC_Os01g42510	-0.847	0.000513919	expressed protein
LOC_Os04g02070	-0.847	0.000509564	expressed protein
LOC_Os07g06820	-0.847	0.000509032	serine/threonine-protein kinase RIO-like, putative, expressed
LOC_Os09g35830	-0.848	0.000497049	RNA recognition motif containing protein, putative, expressed
LOC_Os09g28040	-0.848	0.00049184	OsPOP18 - Putative Prolyl Oligopeptidase homologue, expressed
LOC_Os01g64350	-0.849	0.000474077	expressed protein
LOC_Os07g36780	-0.849	0.000471788	S-domain receptor-like protein kinase, putative, expressed
LOC_Os04g53030	-0.849	0.000470165	NBS-LRR disease resistance protein, putative, expressed
LOC_Os05g07764	-0.85	0.000467872	carboxyl-terminal proteinase, putative, expressed
LOC_Os01g67054	-0.85	0.000463949	calreticulin precursor protein, putative, expressed
LOC_Os03g08970	-0.85	0.000462701	expressed protein
LOC_Os11g44380	-0.85	0.000460887	expressed protein
LOC_Os05g04330	-0.85	0.000457547	DNA methyltransferase protein, putative, expressed
LOC_Os02g27440	-0.851	0.000442395	DNA topoisomerase 1, putative, expressed
LOC_Os03g49400	-0.852	0.000436349	ethylene-insensitive protein, putative, expressed
LOC_Os11g15010	-0.852	0.000434947	transposon protein, putative, Mutator sub-class, expressed
LOC_Os02g34520	-0.852	0.000428361	retrotransposon protein, putative, Ty1-copia subclass, expressed
LOC_Os11g17600	-0.853	0.00042336	roothairless 1, putative, expressed
LOC_Os01g37210	-0.853	0.000418985	expressed protein
LOC_Os02g45710	-0.853	0.000416399	zinc finger, C3HC4 type domain containing protein, expressed
LOC_Os01g07280	-0.854	0.000411053	disease resistance protein, putative, expressed
LOC_Os01g10580	-0.854	0.000402771	B-box zinc finger family protein, putative, expressed
LOC_Os03g14850	-0.855	0.000399379	OsMADS72 - MADS-box family gene with M-alpha type-box, expressed
LOC_Os02g45980	-0.855	0.000398418	ZR1 protein, putative, expressed
LOC_Os04g42940	-0.855	0.000394016	expressed protein
LOC_Os08g03890	-0.855	0.000390333	hypothetical protein
LOC_Os01g22070	-0.856	0.000379398	transposon protein, putative, Mutator sub-class, expressed
LOC_Os12g25720	-0.856	0.000378791	expressed protein
LOC_Os11g29110	-0.857	0.000370689	Leucine Rich Repeat family protein, expressed
LOC_Os09g15340	-0.857	0.000370679	hydrolase, NUDIX family, domain containing protein, expressed
LOC_Os05g44900	-0.857	0.000366347	expressed protein
LOC_Os05g34800	-0.859	0.000350099	expressed protein
LOC_Os02g40450	-0.859	0.000347663	DEAD/DEAH box helicase domain containing protein, expressed
LOC_Os01g19694	-0.859	0.000339342	Homeobox domain containing protein, expressed
LOC_Os01g22230	-0.86	0.000331221	peroxidase precursor, putative, expressed
LOC_Os01g17040	-0.861	0.000326985	heat shock protein DnaJ, putative, expressed
LOC_Os06g20060	-0.861	0.000326512	expressed protein
LOC_Os04g42610	-0.861	0.000325214	plant protein of unknown function DUF869 domain containing protein, expressed
LOC_Os09g08710	-0.861	0.000319015	expressed protein
LOC_Os12g32680	-0.862	0.000308651	NB-ARC domain containing protein, expressed
LOC_Os01g51250	-0.862	0.000307618	mitochondrial carrier protein, putative, expressed
LOC_Os04g35500	-0.863	0.000301336	ZF-HD protein dimerisation region containing protein, expressed
LOC_Os09g24460	-0.864	0.000294105	expressed protein
LOC_Os09g32910	-0.864	0.000287397	OsFBX337 - F-box domain containing protein, expressed
LOC_Os09g03630	-0.864	0.000285602	ankyrin, putative, expressed
LOC_Os04g20960	-0.866	0.000269968	expressed protein
LOC_Os04g42784	-0.866	0.000268018	DNA mismatch repair protein, putative, expressed
LOC_Os08g31460	-0.867	0.000265686	GTPase of unknown function domain containing protein, putative, expressed
LOC_Os07g45620	-0.868	0.000255242	retrotransposon protein, putative, Ty3-gypsy subclass, expressed
LOC_Os02g46420	-0.868	0.0002535	transposon protein, putative, unclassified, expressed
LOC_Os07g35310	-0.868	0.000252745	TKL_IRAK_DUF26-lc.12 - DUF26 kinases have homology to DUF26 containing loci, expressed
LOC_Os06g06740	-0.869	0.000246478	MYB family transcription factor, putative, expressed
LOC_Os06g35530	-0.869	0.000246263	CGMC_GSK.8 - CGMC includes CDA, MAPK, GSK3, and CLKC kinases, expressed
LOC_Os03g52680	-0.869	0.000245003	expressed protein
LOC_Os06g06780	-0.869	0.000242678	harpin-induced protein, putative, expressed
LOC_Os06g12129	-0.869	0.000238486	expressed protein
LOC_Os05g39520	-0.87	0.000234419	methyltransferase, putative, expressed
LOC_Os01g20720	-0.871	0.000225724	CC-NBS-LRR, putative, expressed
LOC_Os05g31620	-0.871	0.000222878	OsCML15 - Calmodulin-related calcium sensor protein, expressed
LOC_Os09g21689	-0.872	0.000218727	expressed protein
LOC_Os10g38890	-0.872	0.000216654	expressed protein
LOC_Os03g47530	-0.874	0.000203999	glycosyl transferase 8 domain containing protein, putative, expressed
LOC_Os05g08450	-0.874	0.000203497	expressed protein
LOC_Os02g36960	-0.876	0.000186725	choline transporter-related, putative, expressed
LOC_Os04g36740	-0.877	0.000180606	potassium channel SKOR, putative, expressed
LOC_Os05g47960	-0.878	0.000172362	expressed protein
LOC_Os03g54970	-0.88	0.000162096	expressed protein
LOC_Os04g52090	-0.88	0.000157688	AP2 domain containing protein, expressed
LOC_Os01g08380	-0.88	0.000157486	transferase family protein, putative, expressed
LOC_Os01g67260	-0.88	0.000156548	expressed protein
LOC_Os03g13850	-0.881	0.000155284	cell cycle checkpoint protein RAD17, putative, expressed
LOC_Os03g61240	-0.881	0.000152656	expressed protein
LOC_Os05g23340	-0.882	0.000146968	expressed protein
LOC_Os04g57340	-0.883	0.000142949	AP2 domain containing protein, expressed
LOC_Os08g34300	-0.883	0.000140023	retrotransposon protein, putative, unclassified, expressed
LOC_Os08g32430	-0.883	0.00013951	expressed protein
LOC_Os01g60350	-0.884	0.000137921	expressed protein
LOC_Os08g43410	-0.884	0.000135412	LRP1, putative, expressed
LOC_Os02g51030	-0.885	0.000131982	methyltransferase domain containing protein, putative, expressed
LOC_Os11g08840	-0.885	0.000130938	expressed protein
LOC_Os12g09590	-0.885	0.000130691	leafbladeless1, putative, expressed
LOC_Os04g34270	-0.886	0.00012676	serine/threonine-protein kinase receptor precursor, putative, expressed
LOC_Os03g14205	-0.886	0.000125723	expressed protein
LOC_Os04g02354	-0.887	0.000117835	expressed protein
LOC_Os03g12840	-0.887	0.000117489	Inositol 1, 3, 4-trisphosphate 5/6-kinase, putative, expressed
LOC_Os03g04610	-0.888	0.00011502	expressed protein
LOC_Os02g12130	-0.888	0.000113797	cysteine-rich receptor-like protein kinase 35 precursor, putative, expressed
LOC_Os05g41890	-0.888	0.000112601	expressed protein
LOC_Os12g09670	-0.89	0.000104094	expressed protein
LOC_Os04g31610	-0.89	0.000103734	OsFBO3 - F-box and other domain containing protein, expressed
LOC_Os01g70710	-0.89	0.000103544	heavy metal-associated domain containing protein, expressed
LOC_Os07g47990	-0.89	0.000103223	peroxidase precursor, putative, expressed
LOC_Os04g23319	-0.891	0.000100897	expressed protein
LOC_Os05g12730	-0.893	9.38985e-05	expressed protein
LOC_Os09g36420	-0.899	7.13655e-05	hsp90 protein, expressed
LOC_Os01g62070	-0.899	7.12377e-05	cation efflux family protein, putative, expressed
LOC_Os03g22190	-0.9	6.59205e-05	expressed protein
LOC_Os09g31200	-0.902	6.07008e-05	AN1-like zinc finger domain containing protein, expressed
LOC_Os03g36560	-0.904	5.3932e-05	peroxidase precursor, putative, expressed
LOC_Os01g02300	-0.904	5.3657e-05	receptor kinase ORK10, putative, expressed
LOC_Os01g57540	-0.905	5.26263e-05	protein kinase, putative, expressed
LOC_Os03g62070	-0.909	4.3035e-05	hydrolase, putative, expressed
LOC_Os09g04924	-0.909	4.10864e-05	expressed protein
LOC_Os02g04730	-0.912	3.64652e-05	cycloartenol synthase, putative, expressed
LOC_Os08g31580	-0.932	1.01683e-05	ethylene-responsive transcription factor, putative, expressed
LOC_Os01g11250	-0.941	5.1661e-06	potassium channel KAT1, putative, expressed
